# Supplementary material for: Potential Hepatoprotective Effects of Chamaecyparis lawsoniana against Methotrexate-Induced Liver Injury: Integrated Phytochemical Profiling, Target Network Analysis, and Experimental Validation
Source: MDPI journal article supplement (doi:10.3390/antiox12122118), 2023-12-14
Supplement: s1 [file s1]

**Table S1.** Target proteins, the corresponding grid coordinates, and amino acid residues of the active sites.

| Target protein | PDB ID | Grid box coordinates        |                           | Amino acid residues of the active site                                                                                                                                                                              |
|----------------|--------|-----------------------------|---------------------------|---------------------------------------------------------------------------------------------------------------------------------------------------------------------------------------------------------------------|
|                |        | Centers (x, y, z)           | Sizes (x, y, z)           |                                                                                                                                                                                                                     |
| TP53           | 8DC4   | -3.38569, 44.2361, 70.4518  | 21.6746, 20.5837, 15.0543 | Phe109, Leu145, Trp146, Val147, Pro151, Cys220, Glu221, Pro222, Pro223, Asp228, Ser229, Thr230 and Leu257                                                                                                           |
| IL6            | 4NI9   | -0.21833, 19.2354, 17.4484  | 15.4327, 15.8048, 16.1265 | Leu33, Ile36, Ser37, Arg40, Thr43, His164, Leu167, Arg168 and Lys171                                                                                                                                                |
| TNF- $\alpha$  | 2AZ5   | -21.1962, 75.6541, 32.956   | 16.589, 20.5662, 19.9422  | HisA15, LeuA57, IleA58, TyrA59, SerA60, GlnA61, TyrA119, LeuA120, GlyA121, GlyA122, GlnA149, TyrA151, IleA155, LeuB57, TyrB59, SerB60, GlnB61, TyrB119, LeuB120, GlyB121 and TyrB151                                |
| HSP90AA1       | 8AGI   | -25.8843, 19.7976, -14.2299 | 19.1259, 18.0473, 20.8229 | Glu47, Leu48, Ser50, Asn51, Ser52, Asp54, Ala55, Lys58, Ile91, Val92, Asp93, Ile96, Gly97, Met98, Asp102, Asn106, Leu107, Ile110, Ala111, Gly132, Gly135, Val136, Gly137, Phe138, Tyr139, Val150, Thr184 and Val186 |
| EGFR           | 7T4I   | -1.80337, 21.6678, 52.6633  | 23.0255, 26.1052, 16.8854 | Leu718, Gly719, Phe723, Val726, Ala743, Lys745, Leu747, Glu758, Ile759, Glu762, Cys775, Leu788, Thr790, Leu792, Met793, Gly796, Cys797, Asp837, Arg841, Asn842, Leu844, Thr854, Asp855, Gly857, Leu858 and Pro877   |
| IL1B           | 1T4Q   | -17.0683, 9.10508, -15.1524 | 16.9232, 17.5659, 16.972  | Ser43, Ser45, Gly61, Leu62, Glu64, Lys65, Tyr68 and Pro91                                                                                                                                                           |
| BCL2           | 7LHB   | 23.8668, -3.05969, 23.1438  | 23.6987, 28.1142, 26.0363 | Ala100, Asp103, Phe104, Asp111, Phe112, Glu114, Met115, Gln118, Val133, Glu136, Leu137, Trp144, Gly145, Val148, Ala149,                                                                                             |

|       |      |                            |                           |                                                                                                          |
|-------|------|----------------------------|---------------------------|----------------------------------------------------------------------------------------------------------|
|       |      |                            |                           | Glu152, Phe153,<br>Val156, Phe198, Tyr202                                                                |
| CASP3 | 3KJF | 24.8943, -9.50017, 7.49641 | 22.7691, 19.6748, 18.5798 | Trp206, Arg207,<br>Asn208, Ser209,<br>Lys210, Trp214,<br>Glu248, Ser249,<br>Phe250, Ser251 and<br>Phe252 |
