# Supplementary material for: Potential Hepatoprotective Effects of Chamaecyparis lawsoniana against Methotrexate-Induced Liver Injury: Integrated Phytochemical Profiling, Target Network Analysis, and Experimental Validation
Source: MDPI journal article supplement (doi:10.3390/antiox12122118), 2023-12-14
Supplement: s1 [file s1]

**Table S3.** Bioactive compounds of the ethanolic extract of *C. lawsoniana* aerial parts.

| Compound                | SMILES                                                                            | Chemical structure                                                                   |
|-------------------------|-----------------------------------------------------------------------------------|--------------------------------------------------------------------------------------|
| L-Threonic acid         | <chem>C([C@@H]([C@H](C(=O)O)O)O)O</chem>                                          | 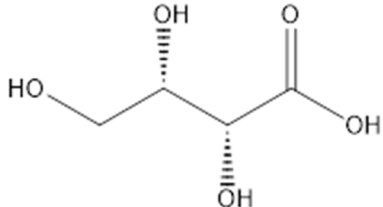  |
| Vanillic acid glucoside | <chem>COC1=C(C=CC(=C1)C(=O)O)O[C@H]2[C@@H]([C@H]([C@@H]([C@H](O2)CO)O)O)O</chem>  |   |
| Quinic acid             | <chem>C1[C@H](C([C@@H](CC1(C(=O)O)O)O)O)O</chem>                                  |   |
| Caffeoylshikimic acid   | <chem>C1[C@H]([C@@H]([C@@H](C=C1C(=O)[O-])O)O)OC(=O)/C=C/C2=CC(=C(C=C2)O)O</chem> |  |

|                                  |                                                                                                |                                                                                      |
|----------------------------------|------------------------------------------------------------------------------------------------|--------------------------------------------------------------------------------------|
| Ferulic acid <i>O</i> -glucoside | <chem>COC1=C(C=CC(=C1)C=CC(=O)O)OC2C(C(C(C(O2)CO)O)O)O</chem>                                  | 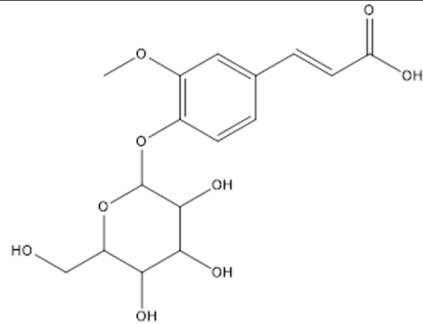  |
| Coumaroylquinic acid             | <chem>C1[C@H]([C@H]([C@@H](C[C@@]1(C(=O)O)O)OC(=O)/C=C/C2=CC=C(C(=C2)O)O)O</chem>              |   |
| Roseoside                        | <chem>CC1=CC(=O)CC([C@]1/C=C/[C@@H](C)O[C@H]2[C@@H]([C@H]([C@@H]([C@H](O2)CO)O)O)O)(C)C</chem> |   |
| Sinapoyl D-glucoside             | <chem>COC1=CC(=CC(=C1O)OC)/C=C/C(=O)OC2[C@@H]([C@H]([C@@H]([C@H](O2)CO)O)O)O</chem>            |  |

|                                                               |                                                                           |                                                                                       |
|---------------------------------------------------------------|---------------------------------------------------------------------------|---------------------------------------------------------------------------------------|
| Pinopalustrin (Nortrachelogenin)                              | <chem>COC1=C(C=CC(=C1)C[C@H]2COC(=O)[C@@]2(CC3=CC(=C(C=C3)O)OC)O)O</chem> | 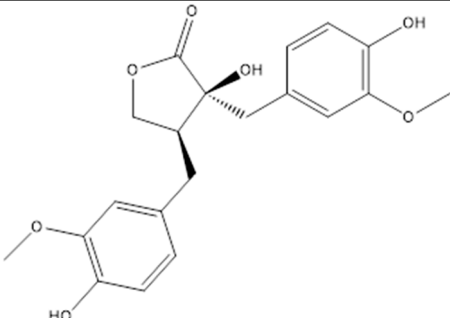   |
| 9,12,13-trihydroxyoctadeca-10,15-dienoic acid (Malyngic Acid) | <chem>CC/C=C\C[C@@H]([C@@H]/C=C/[C@H](CCC(CCCC(=O)O)O)O)O</chem>          |    |
| dihydrokaempferol (Aromadendrin)                              | <chem>C1=CC(=CC=C1[C@@H]2[C@H](C(=O)C3=C(C=C(C3O2)O)O)O)O</chem>          |    |
| 3,7-dimethylquercetin                                         | <chem>COC1=CC(=C2C(=C1)OC(=C(C2=O)OC)C3=CC(=C(C=C3)O)O)O</chem>           |   |
| 4',5,6,7-Tetramethoxyflavone (Scutellarein tetramethyl ether) | <chem>COC1=CC=C(C=C1)C2=CC(=O)C3=C(C(=C(C=C3O2)OC)OC)OC</chem>            |  |

|                                                |                                                                                                 |                                                                                      |
|------------------------------------------------|-------------------------------------------------------------------------------------------------|--------------------------------------------------------------------------------------|
| Phlorizin                                      | <chem>C1=CC(=CC=C1CCC(=O)C2=C(C=C(C=C2O[C@@H]3[C@@H]([C@H]([C@@H]([C@H](O3)CO)O)O)O)O)O</chem>  | 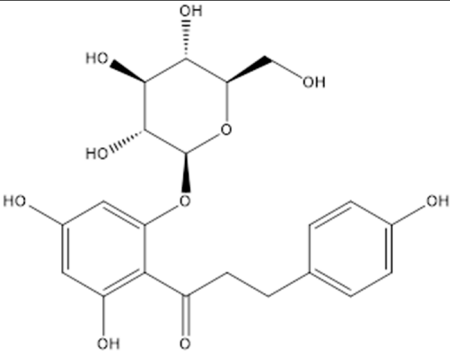  |
| Kaempferol-3- <i>O</i> -arabinoside            | <chem>C1[C@@H]([C@@H]([C@H]([C@@H](O1)OC2=C(OC3=CC(=CC(=C3C2=O)O)O)C4=CC=C(C(=C4)O)O)O)O</chem> |   |
| secoisolariciresinol<br>guaiacylglyceryl ether | <chem>OC[C@H](CC1=CC=C(OC(CO)COC2=CC=CC=C2OC)C(OC)=C1)[C@@H](CC3=CC=C(O)C(OC)=C3)CO</chem>      |  |

|                                         |                                                                                                                   |                                                                                      |
|-----------------------------------------|-------------------------------------------------------------------------------------------------------------------|--------------------------------------------------------------------------------------|
| lariciresinol-4'-guaiacylglyceryl ether | <chem>COC1=CC(C[C@H]2CO[C@H](C3=CC=C(O)C(OC)=C3)[C@H]2CO)=CC=C1O[C@@H](CO)CO</chem><br><chem>C4=CC=CC=C4OC</chem> | 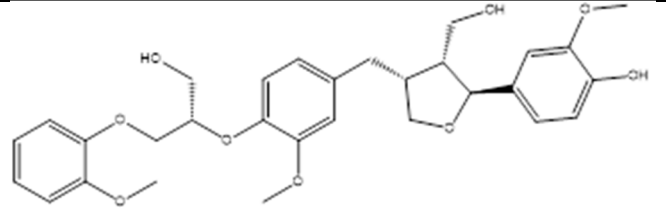  |
| Naringenin                              | <chem>C1[C@H](OC2=CC(=CC(=C2C1=O)O)O)C3=CC=C(C=C3)O</chem>                                                        |   |
| Protocatechualdehyde                    | <chem>C1=CC(=C(C=C1C=O)O)O</chem>                                                                                 |   |
| Matairesinol                            | <chem>COC1=C(C=CC(=C1)C[C@H]2COC(=O)[C@@H]2CC3=CC(=C(C=C3)O)OC)O</chem>                                           |  |

|                                                            |                                                                                                         |                                                                                       |
|------------------------------------------------------------|---------------------------------------------------------------------------------------------------------|---------------------------------------------------------------------------------------|
| <p>7-<i>O</i>-methylamentoflavone<br/>(Sequoiaflavone)</p> | <chem>COC1=CC(=C2C(=C1)OC(=CC2=O)C3=CC(=C(C=C3)O)C4=C(C=C(C5=C4OC(=CC5=O)C6=CC=C(C=C6)O)O)O)O</chem>    | 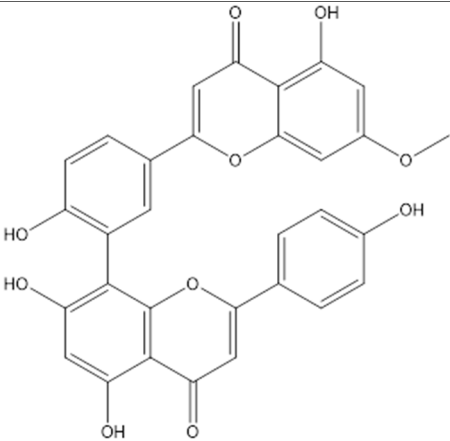   |
| <p>4'-<i>O</i>-methylamentoflavone<br/>(Bilobetin)</p>     | <chem>COC1=C(C=C(C=C1)C2=CC(=O)C3=C(C=C(C=C3O2)O)O)C4=C(C=C(C5=C4OC(=CC5=O)C6=C(C=C(C=C6)O)O)O)O</chem> |   |
| <p>8alpha-8-Hydroxy-12-oxo-13-abieten-18-oic acid</p>      | <chem>CC(C)C1=CC2(CCC3C(C2CC1=O)(CCCC3(C)C(=O)O)C)O</chem>                                              |  |

|                                    |                                                                                                         |                                                                                      |
|------------------------------------|---------------------------------------------------------------------------------------------------------|--------------------------------------------------------------------------------------|
| Copalic acid                       | <chem>C/C(=C\C(=O)O)/CC[C@@H]1C(=C)CC[C@H]2[C@]1(CCCC2(C)C)C</chem>                                     | 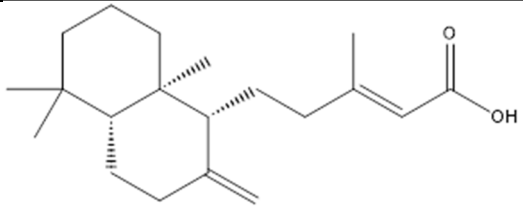  |
| Isoginkgetin                       | <chem>COC1=CC=C(C=C1)C2=CC(=O)C3=C(O2)C(=C(C=C3O)O)C4=C(C=CC(=C4)C5=CC(=O)C6=C(C=C(C=C6O5)O)O)OC</chem> |   |
| Robustaflavone 7,4'-dimethyl ether | <chem>COC1=C(C=C(C=C1)C2=CC(=O)C3=C(C=C(C=C3O2)OC)O)C4=C(C5=C(C=C4O)OC(=CC5=O)C6=CC=C(C=C6O)O)O</chem>  |  |

|                                                |                                                                                     |                                                                                       |
|------------------------------------------------|-------------------------------------------------------------------------------------|---------------------------------------------------------------------------------------|
| Cyclolariciresinol                             | <chem>COC1=C(C=C2[C@@H]([C@H]([C@@H](CC2=C1)CO)CO)C3=CC(=C(C=C3)O)OC)O</chem>       | 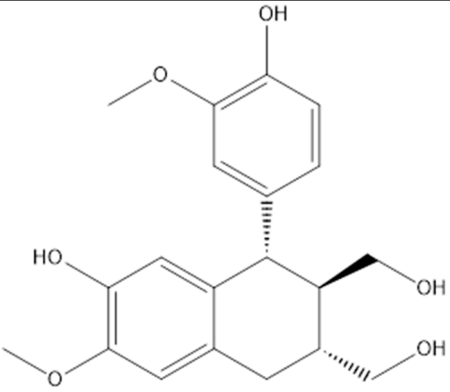   |
| Carnosol                                       | <chem>CC(C)C1=C(C(=C2C(=C1)[C@@H]3C[C@@H]4[C@@]2(CCCC4(C)C)C(=O)O3)O)O</chem>       |    |
| 3-Hydroxysandaracopimaric acid                 | <chem>C[C@@]1(CC[C@H]2C(=C1)CC[C@@H]3[C@@]2(CC[C@@H]([C@@]3(C)C(=O)O)O)C)C=C</chem> |   |
| 12alpha-hydroxy-8,15-isopimaradien-18-oic acid | <chem>C[C@]12CCC[C@@]([C@@H]1CCC3=C2C[C@@H]([C@](C3)(C)C=C)O)(C)C(=O)O</chem>       |  |

|                    |                                                                                |                                                                                                                                                                                                                                                                                                                                                                                                                                                                                                      |
|--------------------|--------------------------------------------------------------------------------|------------------------------------------------------------------------------------------------------------------------------------------------------------------------------------------------------------------------------------------------------------------------------------------------------------------------------------------------------------------------------------------------------------------------------------------------------------------------------------------------------|
| ent-kaurenoic acid | <chem>C[C@@]12CCC[C@@]([C@H]1CC[C@]34[C@H]2CC[C@H](C3)C(=C)C4)(C)C(=O)O</chem> | 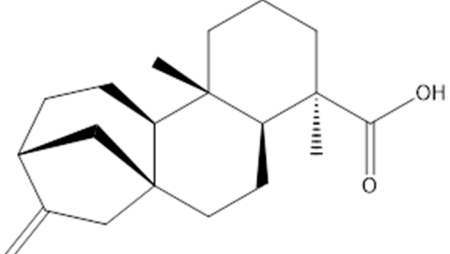 <p>The image shows the chemical structure of ent-kaurenoic acid. It is a tetracyclic diterpene consisting of four fused six-membered rings. The structure features several stereocenters indicated by wedged and dashed bonds. A carboxylic acid group (-COOH) is attached to one of the rings. The structure is drawn in a perspective view, showing the spatial arrangement of the rings and substituents.</p> |
|--------------------|--------------------------------------------------------------------------------|------------------------------------------------------------------------------------------------------------------------------------------------------------------------------------------------------------------------------------------------------------------------------------------------------------------------------------------------------------------------------------------------------------------------------------------------------------------------------------------------------|
