# Supplementary material for: Potential Hepatoprotective Effects of Chamaecyparis lawsoniana against Methotrexate-Induced Liver Injury: Integrated Phytochemical Profiling, Target Network Analysis, and Experimental Validation
Source: Antioxidants (Basel). 2023 Dec 14;12(12):2118. doi: 10.3390/antiox12122118 (PMC10740566; doi:10.3390/antiox12122118)
Supplement: Supplementary file 1 [file antioxidants-12-02118-s001.zip]

Archive with 13 entries (13 files):
- Figure S1.pdf
- Figure S2.pdf
- Table S1.pdf
- Table S10.xlsx
- Table S11.xlsx
- Table S2.xlsx
- Table S3.pdf
- Table S4.xlsx
- Table S5.xlsx
- Table S6.xlsx
- Table S7.xlsx
- Table S8.xlsx
- Table S9.xlsx
