# Supplementary material for: Potential Hepatoprotective Effects of Chamaecyparis lawsoniana against Methotrexate-Induced Liver Injury: Integrated Phytochemical Profiling, Target Network Analysis, and Experimental Validation
Source: Antioxidants (Basel). 2023 Dec 14;12(12):2118. doi: 10.3390/antiox12122118 (PMC10740566; doi:10.3390/antiox12122118)
Supplement: Supplementary file 1 [file antioxidants-12-02118-s001.zip › Table S2.xlsx]

## Sheet: Table S1 (Adme)
Molecule	Consensus Log P	ESOL Log S	ESOL Solubility (mg/ml)	ESOL Solubility (mol/l)	ESOL Class	Ali Log S	Ali Solubility (mg/ml)	Ali Solubility (mol/l)	Ali Class	Silicos-IT LogSw	Silicos-IT Solubility (mg/ml)	Silicos-IT Solubility (mol/l)	Silicos-IT class	GI absorption	BBB permeant	Pgp substrate	CYP1A2 inhibitor	CYP2C19 inhibitor	CYP2C9 inhibitor	CYP2D6 inhibitor	CYP3A4 inhibitor	log Kp (cm/s)	Lipinski #violations	Ghose #violations	Veber #violations	Egan #violations	Muegge #violations	Bioavailability Score	PAINS #alerts	Brenk #alerts	Leadlikeness #violations	Synthetic Accessibility
L-Threonic acid	-1.58	0.86	977	7.18	Highly soluble	0.6	543	3.99	Highly soluble	2	13600	100	Highly soluble	High	No	No	No	No	No	No	No	-8.64	0	4	0	0	3	0.56	0	0	1	2.53
Vanillic acid glucoside	-0.82	-0.8	52.4	0.159	Very soluble	-1.05	29.5	0.0895	Very soluble	0.31	668	2.02	Soluble	Low	No	No	No	No	No	No	No	-9.39	0	1	1	1	0	0.56	0	0	0	4.26
quinic acid	-1.69	0.53	648	3.37	Highly soluble	0.43	512	2.66	Highly soluble	2.08	23000	120	Soluble	Low	No	No	No	No	No	No	No	-9.15	0	1	0	0	2	0.56	0	0	1	3.34
Caffeoylshikimic acid	-0.06	-1.92	4.04	0.0121	Very soluble	-2.88	0.438	0.00131	Soluble	0.05	379	1.13	Soluble	Low	No	No	No	No	No	No	No	-8.18	0	1	1	1	0	0.56	1	2	0	4.15
Protocatechuic acid 4-glucoside	-1.44	-0.87	42.7	0.135	Very soluble	-1.41	12.2	0.0385	Very soluble	1	3170	10	Soluble	Low	No	No	No	No	No	No	No	-9.21	1	1	1	1	2	0.11	0	0	0	4.11
Ferulic acid O-glucoside	-0.59	-1.14	25.6	0.0718	Very soluble	-1.48	11.7	0.0328	Very soluble	0.23	609	1.71	Soluble	Low	No	No	No	No	No	No	No	-9.25	0	1	1	1	0	0.56	0	1	1	4.5
Coumaroylquinic acid	-0.08	-1.75	6.04	0.0178	Very soluble	-2.51	1.04	0.00307	Soluble	-0.18	222	0.656	Soluble	Low	No	No	No	No	No	No	No	-8.41	0	1	1	1	0	0.56	0	1	0	4.07
Syringetin-3-O-glucoside	0.02	-3.34	0.232	0.000456	Soluble	-4.62	0.0122	2.4e-05	Moderately soluble	-2.29	2.59	0.00509	Soluble	Low	No	Yes	No	No	No	No	Yes	-8.93	3	1	1	1	3	0.17	0	0	1	5.59
Roseoside	-0.19	-1.24	22	0.057	Very soluble	-1.33	18	0.0466	Very soluble	-0.03	359	0.929	Soluble	Low	No	Yes	No	No	No	No	No	-9.4	0	1	0	1	0	0.55	0	1	1	5.77
Sinapoyl D-glucoside	-0.51	-1.72	7.3	0.0189	Very soluble	-2.46	1.35	0.0035	Soluble	0.13	519	1.34	Soluble	Low	No	No	No	No	No	No	No	-8.9	0	1	1	1	1	0.55	0	1	1	4.73
kaempferol-3-O-glucoside-7-O-rhamnoside	-1.12	-3.04	0.542	0.000912	Soluble	-4.17	0.04	6.73e-05	Moderately soluble	-0.88	77.7	0.131	Soluble	Low	No	Yes	No	No	No	No	No	-10.35	3	4	1	1	3	0.17	0	0	1	6.52
verbascoside	-0.6	-2.87	0.836	0.00134	Soluble	-4.18	0.0409	6.55e-05	Moderately soluble	-0.22	377	0.604	Soluble	Low	No	Yes	No	No	No	No	No	-10.46	3	4	2	1	4	0.17	1	2	2	6.37
Tricin-4′-O-(erythro-β-guaiacylglyceryl) ether (Salcolin A)	2.54	-4.98	0.00551	1.05e-05	Moderately soluble	-6.45	0.000188	3.57e-07	Poorly soluble	-6.19	0.000342	6.5e-07	Poorly soluble	Low	No	No	No	No	Yes	No	Yes	-7.21	2	2	1	1	2	0.17	0	0	2	4.91
Isorhamnetin-3-O-rutinoside	-0.8	-3.51	0.192	0.000307	Soluble	-4.97	0.00673	1.08e-05	Moderately soluble	-0.97	66.6	0.107	Soluble	Low	No	Yes	No	No	No	No	No	-10.12	3	4	1	1	4	0.17	0	0	1	6.64
Isorhamnetin 3-O-glucoside-7-O-rhamnoside	-0.59	-3.73	0.115	0.000185	Soluble	-5.33	0.00291	4.67e-06	Moderately soluble	-0.97	66.6	0.107	Soluble	Low	No	Yes	No	No	No	No	No	-9.87	3	4	1	1	4	0.17	0	0	1	6.68
Pinopalustrin (Nortrachelogenin)	2.24	-3.67	0.0802	0.000214	Soluble	-4.36	0.0163	4.37e-05	Moderately soluble	-4.69	0.00757	2.02e-05	Moderately soluble	High	No	Yes	No	No	No	Yes	Yes	-6.81	0	0	0	0	0	0.55	0	0	1	3.55
Quercetin 3-rhamnoglucoside	-1.51	-3.3	0.308	0.000505	Soluble	-4.87	0.0083	1.36e-05	Moderately soluble	-0.29	315	0.515	Soluble	Low	No	Yes	No	No	No	No	No	-10.26	3	4	1	1	4	0.17	1	1	1	6.52
quercetin-3-O-glucoside	-0.48	-3.04	0.423	0.00091	Soluble	-4.35	0.021	4.51e-05	Moderately soluble	-1.51	14.3	0.0308	Soluble	Low	No	No	No	No	No	No	No	-8.88	2	1	1	1	3	0.17	1	1	1	5.32
kaempferol dihexoside (kaempferol-3-O-hexoxyl-hexoside)	-1.8	-2.54	1.77	0.0029	Soluble	-3.73	0.115	0.000188	Soluble	-0.31	302	0.494	Soluble	Low	No	Yes	No	No	No	No	No	-11.04	3	4	1	1	4	0.17	0	0	1	6.52
apigenin diglucoside	-1.08	-3.35	0.264	0.000444	Soluble	-4.79	0.00954	1.6e-05	Moderately soluble	-0.9	74.5	0.125	Soluble	Low	No	Yes	No	No	No	No	No	-9.92	3	4	1	1	3	0.17	0	0	1	6.33
(7R*,8R*)-3-Methoxy-3',4,7,9,9'-pentahydroxy-8,4'-oxyneolignan	0.2	-2.18	3.27	0.00659	Soluble	-2.86	0.678	0.00137	Soluble	-2.25	2.81	0.00566	Soluble	Low	No	Yes	No	No	No	No	No	-9.63	2	2	2	1	3	0.17	0	0	2	5.4
Quercitrin (Quercetin 3-rhamnoside)	0.16	-3.33	0.208	0.000464	Soluble	-4.44	0.0163	3.63e-05	Moderately soluble	-2.08	3.69	0.00822	Soluble	Low	No	No	No	No	No	No	No	-8.42	2	0	1	1	3	0.17	1	1	1	5.28
Isorhamnetin 3-O-Glucoside	0.12	-3.26	0.263	0.000551	Soluble	-4.46	0.0167	3.49e-05	Moderately soluble	-2.2	3.03	0.00632	Soluble	Low	No	Yes	No	No	No	No	No	-8.73	2	0	1	1	3	0.17	0	0	1	5.44
9,12,13-trihydroxyoctadeca-10,15-dienoic acid (Malyngic Acid)	2.74	-2.58	0.868	0.00264	Soluble	-4.29	0.017	5.17e-05	Moderately soluble	-1.86	4.54	0.0138	Soluble	High	No	Yes	No	No	No	No	No	-6.47	0	0	1	0	0	0.56	0	1	1	4.49
dihydrokaempferol (Aromadendrin)	1.02	-2.81	0.447	0.00155	Soluble	-3.16	0.198	0.000688	Soluble	-2.61	0.712	0.00247	Soluble	High	No	No	No	No	No	No	No	-7.13	0	0	0	0	0	0.55	0	0	0	3.42
apigenin 7-O-neohesperidoside (rhoifolin)	-0.81	-3.22	0.35	0.000604	Soluble	-4.19	0.037	6.4e-05	Moderately soluble	-1.48	19.2	0.0331	Soluble	Low	No	Yes	No	No	No	No	No	-9.94	3	4	1	1	3	0.17	0	0	1	6.33
3,7-dimethylquercetin	2.13	-4.1	0.0263	7.97e-05	Moderately soluble	-5	0.00328	9.95e-06	Moderately soluble	-4.63	0.00771	2.33e-05	Moderately soluble	High	No	No	Yes	No	Yes	Yes	Yes	-6.16	0	0	0	0	0	0.55	1	1	0	3.43
4',5,6,7-Tetramethoxyflavone (Scutellarein tetramethyl ether)	3.01	-4.04	0.0312	9.12e-05	Moderately soluble	-4.15	0.0244	7.13e-05	Moderately soluble	-6.61	8.5e-05	2.48e-07	Poorly soluble	High	Yes	No	Yes	Yes	Yes	Yes	Yes	-6.21	0	0	0	0	0	0.55	0	0	0	3.51
5,7-Dihydroxy-8,2'-dimethoxyflavone 7-glucuronide	0.63	-3.71	0.0954	0.000194	Soluble	-4.91	0.00608	1.24e-05	Moderately soluble	-3.01	0.483	0.000984	Soluble	Low	No	Yes	No	No	No	No	No	-8.29	1	1	1	1	2	0.11	0	0	1	5.45
Phlorizin	0.06	-2.71	0.85	0.00195	Soluble	-3.83	0.0643	0.000147	Soluble	-1.66	9.59	0.022	Soluble	Low	No	Yes	No	No	No	No	No	-8.58	1	0	1	1	2	0.55	0	0	1	4.93
Dihydro-methoxyisofavoneO-hexoside (Tectoridin)	0.35	-3.26	0.255	0.000551	Soluble	-4.18	0.0307	6.65e-05	Moderately soluble	-2.79	0.748	0.00162	Soluble	Low	No	Yes	No	No	No	No	Yes	-8.53	2	0	1	1	3	0.17	0	0	1	5.3
Isorhamnetin 3-O-rhamnoside	0.65	-3.55	0.13	0.000281	Soluble	-4.55	0.013	2.81e-05	Moderately soluble	-2.77	0.78	0.00169	Soluble	Low	No	Yes	No	No	No	No	Yes	-8.28	2	0	1	1	3	0.17	0	0	1	5.4
Kaempferol-3-O-arabinoside	0.35	-3.12	0.316	0.000755	Soluble	-3.93	0.049	0.000117	Soluble	-2.53	1.23	0.00294	Soluble	Low	No	No	No	No	No	No	No	-8.3	1	0	1	1	2	0.55	0	0	1	5.02
secoisolariciresinol guaiacylglyceryl ether	3.57	-4.92	0.0065	1.2e-05	Moderately soluble	-6.23	0.000323	5.95e-07	Poorly soluble	-7.34	2.47e-05	4.56e-08	Poorly soluble	High	No	Yes	No	Yes	No	No	No	-6.87	1	3	1	0	1	0.55	0	0	3	4.82
lariciresinol-4'-guaiacylglyceryl ether	3.32	-5.04	0.00496	9.17e-06	Moderately soluble	-5.88	0.000713	1.32e-06	Moderately soluble	-7.17	3.65e-05	6.76e-08	Poorly soluble	High	No	Yes	No	No	No	No	Yes	-6.94	1	3	1	0	0	0.55	0	0	3	5.22
Agathisflavone	3.61	-6.75	9.63e-05	1.79e-07	Poorly soluble	-8.6	1.36e-06	2.52e-09	Poorly soluble	-8.7	1.07e-06	1.98e-09	Poorly soluble	Low	No	No	No	No	No	No	No	-6.01	2	2	1	1	3	0.17	0	0	2	4.17
Pharboside C	-0.02	-2.71	1.07	0.00196	Soluble	-3.28	0.287	0.000527	Soluble	-0.24	313	0.575	Soluble	Low	No	No	No	No	No	No	No	-9.75	3	4	1	1	3	0.17	0	0	1	7.74
Naringenin	1.84	-3.49	0.0874	0.000321	Soluble	-3.99	0.0277	0.000102	Soluble	-3.42	0.104	0.000382	Soluble	High	No	Yes	Yes	No	No	No	Yes	-6.17	0	0	0	0	0	0.55	0	0	0	3.01
Protocatechualdehyde	0.8	-1.76	2.39	0.0173	Very soluble	-1.89	1.78	0.0129	Very soluble	-1.17	9.4	0.0681	Soluble	High	Yes	No	No	No	No	No	Yes	-6.37	0	3	0	0	1	0.55	1	2	1	1
Lariciresinol glucoside	0.63	-3.1	0.411	0.000787	Soluble	-3.69	0.106	0.000203	Soluble	-2.6	1.3	0.00248	Soluble	Low	No	Yes	No	No	No	No	No	-9.06	3	2	1	1	3	0.17	0	0	2	5.75
Matairesinol	2.75	-4.06	0.0311	8.68e-05	Moderately soluble	-4.72	0.00677	1.89e-05	Moderately soluble	-5.06	0.00311	8.67e-06	Moderately soluble	High	No	No	No	No	No	Yes	Yes	-6.17	0	0	0	0	0	0.55	0	0	1	3.3
7-O-methylamentoflavone (Sequoiaflavone)	4.01	-6.96	6.12e-05	1.11e-07	Poorly soluble	-8.7	1.1e-06	1.99e-09	Poorly soluble	-9.39	2.26e-07	4.08e-10	Poorly soluble	Low	No	No	No	No	Yes	No	No	-5.86	1	2	1	1	2	0.55	0	0	2	4.34
4`-O-methylamentoflavone (Bilobetin)	3.96	-6.96	6.12e-05	1.11e-07	Poorly soluble	-8.7	1.1e-06	1.99e-09	Poorly soluble	-9.39	2.26e-07	4.08e-10	Poorly soluble	Low	No	No	No	No	Yes	No	No	-5.86	1	2	1	1	2	0.55	0	0	2	4.35
8alpha-8-Hydroxy-12-oxo-13-abieten-18-oic acid	3.1	-3.76	0.0581	0.000174	Soluble	-4.38	0.0141	4.21e-05	Moderately soluble	-3.28	0.177	0.000528	Soluble	High	Yes	Yes	No	No	No	No	No	-6.11	0	0	0	0	0	0.85	0	0	0	4.83
Copalic acid	4.94	-5.41	0.00117	3.86e-06	Moderately soluble	-6.84	4.39e-05	1.44e-07	Poorly soluble	-4.37	0.013	4.29e-05	Moderately soluble	High	Yes	No	No	Yes	Yes	No	No	-3.71	1	0	0	0	1	0.85	0	2	1	4.28
quercetin 3-O-rhamnoside (Quercitrin)	0.22	-3.33	0.208	0.000464	Soluble	-4.44	0.0163	3.63e-05	Moderately soluble	-2.08	3.69	0.00822	Soluble	Low	No	No	No	No	No	No	No	-8.42	2	0	1	1	3	0.17	1	1	1	5.28
Isoginkgetin	4.39	-7.17	3.82e-05	6.75e-08	Poorly soluble	-8.81	8.74e-07	1.54e-09	Poorly soluble	-10.07	4.78e-08	8.43e-11	Insoluble	Low	No	No	No	No	Yes	No	No	-5.72	1	3	1	1	2	0.55	0	0	2	4.47
Robustaflavone 7,4`-dimethyl ether	4.38	-7.17	3.82e-05	6.75e-08	Poorly soluble	-8.81	8.74e-07	1.54e-09	Poorly soluble	-10.07	4.78e-08	8.43e-11	Insoluble	Low	No	No	No	No	Yes	No	No	-5.72	1	3	1	1	2	0.55	0	0	2	4.42
cyclolariciresinol	2.03	-3.38	0.151	0.000419	Soluble	-3.77	0.0618	0.000172	Soluble	-4.05	0.0321	8.91e-05	Moderately soluble	High	No	Yes	No	No	No	Yes	No	-7.04	0	0	0	0	0	0.55	0	0	1	3.89
Carnosol	3.72	-4.77	0.00565	1.71e-05	Moderately soluble	-5.5	0.00105	3.17e-06	Moderately soluble	-4.45	0.0116	3.52e-05	Moderately soluble	High	Yes	Yes	No	No	Yes	No	No	-5.21	0	0	0	0	0	0.55	1	1	1	4.88
3‐Hydroxysandaracopimaric acid	3.74	-4.67	0.00673	2.11e-05	Moderately soluble	-5.69	0.000653	2.05e-06	Moderately soluble	-3.18	0.212	0.000665	Soluble	High	Yes	Yes	No	No	Yes	No	No	-4.87	0	0	0	0	0	0.85	0	1	1	4.8
12alpha-hydroxy-8,15-isopimaradien-18-oic acid	3.73	-4.1	0.0252	7.91e-05	Moderately soluble	-4.74	0.00574	1.8e-05	Moderately soluble	-3.63	0.0752	0.000236	Soluble	High	Yes	Yes	No	No	Yes	No	No	-5.52	0	0	0	0	0	0.85	0	1	1	4.88
ent-kaurenoic acid	4.44	-5.07	0.00257	8.51e-06	Moderately soluble	-5.97	0.000325	1.07e-06	Moderately soluble	-4.11	0.0233	7.71e-05	Moderately soluble	High	Yes	No	No	No	Yes	No	No	-4.29	1	0	0	0	1	0.85	0	1	1	4.91
Ganoleucoin J	3.01	-4.49	0.023	3.2e-05	Moderately soluble	-6.02	0.000692	9.65e-07	Poorly soluble	-5.08	0.00595	8.3e-06	Moderately soluble	Low	No	No	No	Yes	No	No	No	-9.39	2	3	2	1	3	0.11	0	2	2	7.53
