# Supplementary material for: Potential Hepatoprotective Effects of Chamaecyparis lawsoniana against Methotrexate-Induced Liver Injury: Integrated Phytochemical Profiling, Target Network Analysis, and Experimental Validation
Source: Antioxidants (Basel). 2023 Dec 14;12(12):2118. doi: 10.3390/antiox12122118 (PMC10740566; doi:10.3390/antiox12122118)
Supplement: Supplementary file 1 [file antioxidants-12-02118-s001.zip › Table S4.xlsx]

## Sheet: Compounds targets
Targets for all compounds (DILI and others)
ABCB1
ABCC1
ABCG2
ABL1
ABO
ACADM
ACAT1
ACE
ACE2
ACHE
ACLY
ACP1
ACP3
ACVRL1
ADA
ADAM17
ADAM33
ADAMTS4
ADAMTS5
ADCY1
ADCY10
ADH1A
ADH1B
ADH1C
ADH5
ADK
ADORA1
ADORA2A
ADORA2B
ADORA3
ADRA1B
ADRA1D
ADRA2A
ADRA2C
ADRB1
ADRB2
ADRB3
AGTR1
AHCY
AHR
AK1
AKR1A1
AKR1B1
AKR1B10
AKR1C1
AKR1C2
AKR1C3
AKR1C4
AKT1
AKT2
ALAD
ALB
ALDH2
ALDOA
ALK
ALOX12
ALOX15
ALOX5
ALOX5AP
ALPL
AMD1
AMPD2
AMPD3
AMY1A
AMY1B
AMY1C
AMY2A
ANG
ANPEP
ANXA5
APAF1
APCS
APEX1
APH1A
APH1B
APOA2
APP
APRT
AR
ARF1
ARF4
ARG1
ARG2
ARHGAP1
ARL5A
ARSA
ASNS
ATIC
ATOX1
ATP12A
ATP1A1
ATP2A1
ATP6AP1
AURKA
AURKB
AURKC
AVPR1A
AVPR2
AXL
AZGP1
B3GAT1
BACE1
BACE2
BAG1
BCAT2
BCHE
BCL2
BCL2A1
BCL2L1
BCL2L2
BHMT
BIRC7
BLK
BLVRB
BMP2
BMP7
BPI
BRAF
BRCA1
BRPF1
BRS3
BST1
BTK
C1R
C1S
C8G
CA1
CA12
CA13
CA14
CA2
CA3
CA4
CA5A
CA5B
CA6
CA7
CA9
CACNA2D1
CALCRL
CAMK2B
CANT1
CAPN1
CARM1
CASP1
CASP2
CASP3
CASP6
CASP7
CASP8
CAT
CBR1
CBS
CCKBR
CCL5
CCNA1
CCNA2
CCNB1
CCNB2
CCNB3
CCNE1
CCNE2
CCNT1
CCR1
CCR2
CD1A
CD209
CD38
CD81
CDA
CDC25A
CDC25B
CDC25C
CDC42
CDC42BPA
CDC45
CDK1
CDK2
CDK3
CDK4
CDK5
CDK5R1
CDK6
CDK7
CDK9
CES1
CES2
CFB
CFD
CFTR
CHEK1
CHIA
CHIT1
CHRM2
CHRNA7
CLEC4M
CLIC1
CLK1
CLK3
CLPP
CMA1
CNR1
CNR2
COMT
CPA1
CPB1
CPT1A
CRABP2
CRAT
CRHR1
CRYZ
CSF1R
CSK
CSNK1D
CSNK1E
CSNK1G2
CSNK2A1
CSNK2A2
CTNNA1
CTSA
CTSB
CTSD
CTSF
CTSG
CTSK
CTSL
CTSS
CTSV
CXCR1
CXCR2
CYP11B1
CYP11B2
CYP17A1
CYP19A1
CYP1B1
CYP24A1
CYP26A1
CYP26B1
CYP2C19
CYP2C8
CYP2C9
CYP3A4
CYP51A1
DAGLA
DAGLB
DAO
DAPK1
DCK
DCPS
DCXR
DDR1
DDR2
DDX39B
DDX6
DHFR
DHODH
DLG4
DNM1
DNMT1
DNMT3B
DNPH1
DOT1L
DPEP1
DPP4
DPP7
DRD1
DRD2
DRD3
DRD4
DRD5
DTYMK
DUSP1
DUSP3
DUSP6
DUT
DYRK1A
DYRK1B
DYRK2
ECE1
EDNRA
EDNRB
EEA1
EGFR
EGLN1
EHMT1
EHMT2
EIF4A1
EIF4E
ELANE
ENPEP
ENPP2
EPHA2
EPHA3
EPHB2
EPHB4
EPHX2
ERBB2
ERBB4
ERCC5
ERI1
ERN1
ESR1
ESR2
ESRRA
ESRRB
ESRRG
EZH1
EZH2
F10
F11
F2
F2R
F3
F7
F9
FAAH
FABP1
FABP2
FABP3
FABP4
FABP5
FABP6
FABP7
FADS1
FAP
FCAR
FDFT1
FDPS
FECH
FEN1
FFAR1
FGF1
FGFR1
FGFR2
FGG
FGR
FHIT
FKBP1A
FKBP1B
FKBP3
FLT1
FLT3
FLT4
FNTA
FNTB
FOLH1
FOLR1
FOLR2
FPGS
FPR1
FUCA1
FUT7
G6PD
GAA
GABBR1
GABBR2
GABRA1
GABRA2
GABRA3
GABRA5
GABRB2
GABRB3
GABRG2
GABRR1
GALE
GALK1
GART
GATM
GBA
GBA2
GC
GCDH
GCGR
GCK
GGPS1
GLO1
GLRA1
GLRA2
GLRX
GLTP
GLUL
GM2A
GMPR
GMPR2
GNPDA1
GP1BA
GPBAR1
GPER1
GPI
GPR18
GPR35
GPR55
GRB2
GRIK1
GRIK2
GRIK3
GRK2
GRK6
GRM1
GRM2
GRM3
GRM4
GRM5
GRM6
GRM8
GSK3A
GSK3B
GSR
GSS
GSTA1
GSTA2
GSTA3
GSTK1
GSTM1
GSTM2
GSTO1
GSTP1
GSTT2B
GSTZ1
HADH
HAGH
HAO1
HAO2
HCAR2
HCK
HDAC1
HDAC2
HDAC3
HDAC6
HDAC8
HEXB
HIF1A
HINT1
HK1
HK2
HMGCR
HMOX1
HNF4A
HNF4G
HNMT
HPN
HPRT1
HRAS
HSD11B1
HSD11B2
HSD17B1
HSD17B11
HSD17B14
HSD17B2
HSD17B3
HSP90AA1
HSP90AB1
HSPA1A
HSPA1B
HSPA5
HSPA8
HTR1A
HTR2A
HTR2C
HTR6
HTR7
IARS
ICAM2
IDH1
IDO1
IGF1
IGF1R
IGFBP3
IGFBP5
IGLV2-8
IKBKB
IL1B
IL2
IL6
IMPA1
IMPDH1
IMPDH2
INMT
INSR
IRAK4
ISG20
ITGA2B
ITGA4
ITGAL
ITGAV
ITGB1
ITGB3
ITGB5
ITGB6
ITGB7
ITK
ITPKA
ITPR1
IVD
JAK1
JAK2
JAK3
JUN
KAT2B
KCNA3
KCNA5
KCNJ1
KCNMA1
KDM2A
KDM3A
KDM4A
KDM4C
KDM4D
KDM4E
KDM5A
KDM5B
KDM5C
KDM6B
KDR
KIF11
KIF5B
KIT
KLK1
KLK2
KMT2A
KMT5A
KYAT1
LAP3
LARS
LCK
LCN2
LDHA
LDHB
LGALS2
LGALS3
LGALS7
LGALS9
LNPEP
LPA
LRRK2
LTA4H
LTB4R
LTF
LYN
LYPLA1
LYPLA2
LYZ
MAG
MAN1B1
MAN2B1
MANBA
MAOA
MAOB
MAP2K1
MAP2K2
MAP2K7
MAP3K11
MAP3K14
MAP3K5
MAP3K7
MAP3K9
MAPK1
MAPK10
MAPK11
MAPK12
MAPK14
MAPK3
MAPK8
MAPKAPK2
MAPKAPK5
MAPT
MARS
MC4R
MCL1
MDM2
ME2
MERTK
MET
MGAM
MGLL
MGMT
MIF
MKNK2
MME
MMEL1
MMP1
MMP12
MMP13
MMP14
MMP15
MMP16
MMP2
MMP26
MMP3
MMP7
MMP8
MMP9
MPG
MPO
MTAP
MTHFD1
MTNR1A
MTNR1B
MTOR
MYLK
NAALAD2
NAE1
NCS1
NCSTN
NDST1
NEK1
NEK2
NEK6
NEU2
NEU3
NEU4
NLK
NME2
NMNAT1
NMNAT3
NMUR2
NNMT
NNT
NOD2
NOS2
NOS3
NOX4
NPC1L1
NPR3
NPY5R
NQO1
NQO2
NR1H2
NR1H3
NR1H4
NR1I2
NR1I3
NR3C1
NR3C2
NR4A1
NRP1
NT5M
NTRK1
NTRK2
NUAK1
NUDT9
OAT
ODC1
OGA
OPRD1
OPRK1
OPRM1
OTC
P2RX3
P2RX7
P2RY1
PADI1
PADI4
PAH
PAK6
PANK3
PAPSS1
PARP1
PCK1
PCMT1
PCTP
PDE10A
PDE1B
PDE2A
PDE3B
PDE4A
PDE4B
PDE4D
PDE5A
PDE7A
PDE9A
PDGFRB
PDHB
PDK1
PDK2
PDPK1
PEPD
PFKFB3
PGD
PGF
PGR
PHF8
PI4KB
PIK3CA
PIK3CB
PIK3CD
PIK3CG
PIK3R1
PIM1
PIM2
PITPNA
PITRM1
PKLR
PKN1
PLA2G10
PLA2G1B
PLA2G2A
PLA2G4A
PLA2G5
PLA2G7
PLAT
PLAU
PLEKHA4
PLG
PLK1
PLK4
PMS2
PNMT
PNP
PNPO
POLA1
POLB
PPARA
PPARD
PPARG
PPCDC
PPIA
PPM1B
PPP1CA
PPP1CC
PPP2CA
PPP2R5A
PPP5C
PRDX5
PREP
PRKACA
PRKCA
PRKCB
PRKCD
PRKCE
PRKCG
PRKCH
PRKCQ
PRKCZ
PRKDC
PRMT1
PRMT3
PRMT5
PROCR
PRSS1
PRSS3
PRUNE1
PSAP
PSEN1
PSEN2
PSENEN
PSPH
PTAFR
PTGDR
PTGDR2
PTGER1
PTGER2
PTGER3
PTGER4
PTGES
PTGES2
PTGFR
PTGIR
PTGS1
PTGS2
PTK2
PTK2B
PTPN1
PTPN11
PTPN2
PTPN22
PTPN6
PTPRC
PTPRF
PTPRS
PYGL
PYGM
QARS
QDPR
QPCT
QPCTL
RAB11A
RAB5A
RAB9A
RAC1
RAC2
RAF1
RAN
RAP2A
RARA
RARB
RARG
RARS
RBP4
RCE1
REG1A
RELA
REN
RET
RFK
RHEB
RHOA
RIDA
RIPK2
RNASE2
RNASE3
RNASE4
RND3
ROCK2
RORA
RORC
ROS1
RPS6KA3
RPS6KA4
RPS6KB1
RTN4R
RXRA
RXRB
RXRG
S100A9
SAE1
SCD
SCN5A
SDS
SEC14L2
SELE
SELL
SELP
SERPINA1
SERPINA6
SERPINE1
SETD7
SETDB1
SF3B3
SGK1
SHBG
SHH
SHMT1
SI
SIGMAR1
SIRT2
SLC16A1
SLC19A1
SLC1A1
SLC1A2
SLC22A12
SLC22A6
SLC28A2
SLC28A3
SLC29A1
SLC33A1
SLC37A4
SLC46A1
SLC5A1
SLC5A2
SLC5A4
SLC6A1
SLC6A11
SLC6A12
SLC6A13
SLC6A2
SLC6A3
SLC6A4
SMYD2
SNCA
SNRPA
SOAT1
SOAT2
SOD2
SORD
SPARC
SPR
SRC
SRD5A1
SRD5A2
SREBF2
SRM
SSTR5
ST14
ST6GAL1
STAT1
STAT6
STK33
STS
SULT1A1
SULT1E1
SULT2A1
SULT2B1
SUV39H1
SYK
TAB1
TACR2
TAP1
TARS
TAS2R31
TBXA2R
TBXAS1
TDP1
TEK
TERT
TGFB2
TGFBR1
TGFBR2
TGM2
TGM3
THRA
THRB
TK1
TKT
TLR4
TMPRSS15
TNF
TNK2
TNKS
TNKS2
TNNC1
TOP1
TOP2A
TP53
TPH1
TPI1
TPSB2
TRAPPC3
TRDMT1
TREH
TREM1
TRPM2
TRPM8
TRPV1
TRPV4
TSPO
TTL
TTPA
TTR
TUBB1
TYK2
TYMP
TYMS
TYR
TYRO3
UAP1
UBA2
UCK2
UGCG
UGT2B7
UMPS
UPP1
UQCRB
VARS
VAV1
VCP
VDR
VEGFA
WARS1
WAS
WEE1
XDH
XIAP
YARS
YARS1
YES1
YWHAG
ZAP70
