# Supplementary material for: Potential Hepatoprotective Effects of Chamaecyparis lawsoniana against Methotrexate-Induced Liver Injury: Integrated Phytochemical Profiling, Target Network Analysis, and Experimental Validation
Source: Antioxidants (Basel). 2023 Dec 14;12(12):2118. doi: 10.3390/antiox12122118 (PMC10740566; doi:10.3390/antiox12122118)
Supplement: Supplementary file 1 [file antioxidants-12-02118-s001.zip › Table S5.xlsx]

## Sheet: DILI targets
Gene Symbol	Description
A2M	alpha-2-macroglobulin
AADAC	Arylacetamide Deacetylase
AASS	Aminoadipate-Semialdehyde Synthase
ABCB1	ATP Binding Cassette Subfamily B Member 1
ABCB11	ATP Binding Cassette Subfamily B Member 11
ABCB4	ATP Binding Cassette Subfamily B Member 4
ABCB6	ATP binding cassette subfamily B member 6 (Langereis blood group)
ABCB7	ATP Binding Cassette Subfamily B Member 7
ABCC1	ATP Binding Cassette Subfamily C Member 1
ABCC2	ATP Binding Cassette Subfamily C Member 2
ABCC3	ATP Binding Cassette Subfamily C Member 3
ABCC4	ATP binding cassette subfamily C member 4
ABCD1	ATP-binding cassette, subfamily D, member 1
ABCD2	ATP-binding cassette, subfamily D, member 2
ABCG1	ATP Binding Cassette Subfamily G Member 1
ABCG2	ATP Binding Cassette Subfamily G Member 2 (Junior Blood Group)
ABI1	abl interactor 1
ACE	Angiotensin I Converting Enzyme
ACHE	Acetylcholinesterase (Cartwright Blood Group)
ACOX1	Acyl-CoA Oxidase 1
ACOX2	Acyl-Coenzyme A oxidase 2, branched chain
ACOX3	acyl-CoA oxidase 3, pristanoyl
ACSL1	acyl-CoA synthetase long chain family member 1
ACTB	actin beta
ACTN4	actinin alpha 4
ACTR3	actin related protein 3
ADA	Adenosine Deaminase
ADAM8	ADAM metallopeptidase domain 8
ADH1A	alcohol dehydrogenase 1A (class I), alpha polypeptide
ADH1B	Alcohol Dehydrogenase 1B (Class I), Beta Polypeptide
ADH1C	Alcohol Dehydrogenase 1C (Class I), Gamma Polypeptide
ADH6	Alcohol Dehydrogenase 6 (Class V)
ADIPOQ	Adiponectin, C1Q And Collagen Domain Containing
ADIPOR1	Adiponectin Receptor 1
ADIPOR2	Adiponectin Receptor 2
ADORA3	Adenosine A3 Receptor
ADRB3	Adrenoceptor Beta 3
AFM	afamin
AFP	Alpha Fetoprotein
AGBL4	AGBL Carboxypeptidase 4
AGT	angiotensinogen
AHR	Aryl Hydrocarbon Receptor
AIFM1	Apoptosis Inducing Factor Mitochondria Associated 1
AKR1A1	Aldo-Keto Reductase Family 1 Member A1
AKR7A3	Aldo-Keto Reductase Family 7 Member A3
AKT2	AKT Serine/Threonine Kinase 2
ALAD	Aminolevulinate Dehydratase
ALAS1	5'-Aminolevulinate Synthase 1
ALB	Albumin
ALDH1A1	aldehyde dehydrogenase 1 family member A1
ALDH1L2	aldehyde dehydrogenase 1 family member L2
ALDH9A1	aldehyde dehydrogenase 9 family member A1
ALDOB	Aldolase, Fructose-Bisphosphate B
ALG10B	ALG10 alpha-1,2-glucosyltransferase B
ALK	ALK Receptor Tyrosine Kinase
ALOX5	Arachidonate 5-Lipoxygenase
ALPP	Alkaline Phosphatase, Placental
AMBP	alpha-1-microglobulin/bikunin precursor
ANK2	Ankyrin-2, nonerythrocytic
ANPEP	Alanyl Aminopeptidase, Membrane
ANXA2	annexin A2
ANXA5	Annexin A5
ANXA6	annexin A6
AOC1	Amine Oxidase Copper Containing 1
AOX1	Aldehyde Oxidase 1
APEH	Acylaminoacyl-Peptide Hydrolase
APOA1	Apolipoprotein A1
APOB	Apolipoprotein B
APOC3	Apolipoprotein C3
APOE	Apolipoprotein E
APOH	apolipoprotein H
ARG1	arginase 1
ARHGAP24	Rho GTPase Activating Protein 24
ARHGEF1	Rho guanine nucleotide exchange factor, 115-kD
ARHGEF11	Rho guanine nucleotide exchange factor 11
ARNT	aryl hydrocarbon receptor nuclear translocator
ARR3	arrestin 3
ARSL	Arylsulfatase L
ASPG	asparaginase
ASS1	Argininosuccinate Synthase 1
ATF3	Activating Transcription Factor 3
ATG5	autophagy related 5
ATOH8	atonal bHLH transcription factor 8
ATP6V1D	ATPase H+ transporting V1 subunit D
ATP7B	ATPase Copper Transporting Beta
ATP8B1	ATPase Phospholipid Transporting 8B1
ATR	ATR serine/threonine kinase
ATXN2	Ataxin-2
ATXN8OS	Ataxin 8 opposite strand
AVP	Arginine Vasopressin
BAAT	Bile Acid-CoA:Amino Acid N-Acyltransferase
BACH1	BTB Domain And CNC Homolog 1
BAD	BCL2 Associated Agonist Of Cell Death
BAK1	BCL2 Antagonist/Killer 1
BAX	BCL2 Associated X, Apoptosis Regulator
BBC3	p53-upregulated modulator of apoptosis
BCHE	Butyrylcholinesterase
BCL2	BCL2 Apoptosis Regulator
BCL2L11	BCL2 Like 11
BCL2L15	BCL2 Like 15
BCL3	BCL3 Transcription Coactivator
BDH1	3-hydroxybutyrate dehydrogenase 1
BDKRB2	bradykinin receptor B2
BID	BH3 Interacting Domain Death Agonist
BLVRB	biliverdin reductase B
BMP6	Bone Morphogenetic Protein 6
BPNT1	3'(2'), 5'-bisphosphate nucleotidase 1
BRD4	bromodomain containing 4
BRI3BP	BRI3-binding protein
BTD	biotinidase
C3	complement C3
C3orf38	Chromosome 3 Open Reading Frame 38
CA3	carbonic anhydrase 3
CABIN1	Calcineurin Binding Protein 1
CADPS2	calcium dependent secretion activator 2
CALCA	Calcitonin Related Polypeptide Alpha
CALR	Calreticulin
CANX	calnexin
CAP1	cyclase associated actin cytoskeleton regulatory protein 1
CASP2	Caspase 2
CASP3	Caspase 3
CASP8	Caspase 8
CASP9	Caspase 9
CASR	calcium sensing receptor
CAT	Catalase
CAV1	Caveolin 1
CCDC80	coiled-coil domain containing 80
CCL2	C-C Motif Chemokine Ligand 2
CCL27	C-C Motif Chemokine Ligand 27
CCL5	C-C Motif Chemokine Ligand 5
CCND1	Cyclin D1
CCR2	C-C motif chemokine receptor 2
CCR5	C-C Motif Chemokine Receptor 5
CCT3	chaperonin containing TCP1 subunit 3
CCT5	chaperonin containing TCP1 subunit 5
CD33	CD33 Molecule
CD36	CD36 Molecule
CD40LG	CD40 Ligand
CD44	CD44 Molecule (Indian Blood Group)
CD79A	CD79a Molecule
CD80	CD80 Molecule
CDC25B	cell division cycle 25B
CDC25C	Cell Division Cycle 25C
CDC42	Cell division cycle 42 (GTP-binding protein, 25kD)
CDH5	cadherin 5
CDK1	Cyclin Dependent Kinase 1
CDK4	cyclin dependent kinase 4
CDK9	cyclin dependent kinase 9
CDKN1A	Cyclin Dependent Kinase Inhibitor 1A
CDKN2A	Cyclin-dependent kinase inhibitor 2A (p16, inhibits CDK4)
CDS1	CDP-diacylglycerol synthase 1
CEBPA	CCAAT/enhancer-binding protein (C/EBP), alpha
CELA1	chymotrypsin like elastase 1
CEP290	Centrosomal Protein 290
CEP44	Centrosomal Protein 44
CES1	Carboxylesterase 1
CES1P1	Carboxylesterase 1 Pseudogene 1
CES2	Carboxylesterase 2
CETP	Cholesteryl Ester Transfer Protein
CFAP20	cilia and flagella associated protein 20
CFH	complement factor H
CFL1	Cofilin 1
CFTR	CF Transmembrane Conductance Regulator
CHEK1	Checkpoint kinase 1
CHGA	Chromogranin A
CHIC2	Cysteine-rich hydrophobic domain 2 (Brx-like gene translocated in leukemia)
CHKA	Choline Kinase Alpha
CHPT1	choline phosphotransferase 1
CHRM3	cholinergic receptor muscarinic 3
CKAP2	Cytoskeleton Associated Protein 2
CKB	creatine kinase B
CLDN4	Claudin 4
CLNS1A	Chloride channel, nucleotide-sensitive, 1A
CLU	clusterin
COL14A1	collagen type XIV alpha 1 chain
COL18A1	Collagen Type XVIII Alpha 1 Chain
COL3A1	collagen type III alpha 1 chain
COMT	Catechol-O-Methyltransferase
COQ9	coenzyme Q9
COX5A	Cytochrome C Oxidase Subunit 5A
COX8A	cytochrome c oxidase subunit 8A
CP	Ceruloplasmin
CPOX	Coproporphyrinogen Oxidase
CPQ	carboxypeptidase Q
CPS1	carbamoyl-phosphate synthase 1
CPT1A	Carnitine Palmitoyltransferase 1A
CPT2	Carnitine Palmitoyltransferase 2
CRP	C-Reactive Protein
CRYZ	crystallin zeta
CSF1	Colony Stimulating Factor 1
CSF2	Colony Stimulating Factor 2
CSF3	Colony Stimulating Factor 3
CTLA4	Cytotoxic T-Lymphocyte Associated Protein 4
CTNNB1	Catenin Beta 1
CTSE	cathepsin E
CUX2	Cut Like Homeobox 2
CXADR	CXADR Ig-Like Cell Adhesion Molecule
CXCL1	C-X-C motif chemokine ligand 1
CXCL10	C-X-C Motif Chemokine Ligand 10
CXCL2	C-X-C Motif Chemokine Ligand 2
CXCL8	C-X-C Motif Chemokine Ligand 8
CXCR2	C-X-C Motif Chemokine Receptor 2
CYCS	Cytochrome C, Somatic
CYP17A1	Cytochrome P450 Family 17 Subfamily A Member 1
CYP1A1	Cytochrome P450 Family 1 Subfamily A Member 1
CYP1A2	Cytochrome P450 Family 1 Subfamily A Member 2
CYP20A1	Cytochrome P450 Family 20 Subfamily A Member 1
CYP27A1	Cytochrome P450 Family 27 Subfamily A Member 1
CYP2A6	Cytochrome P450 Family 2 Subfamily A Member 6
CYP2A7	cytochrome P450 family 2 subfamily A member 7
CYP2B6	Cytochrome P450 Family 2 Subfamily B Member 6
CYP2C19	Cytochrome P450 Family 2 Subfamily C Member 19
CYP2C8	Cytochrome P450 Family 2 Subfamily C Member 8
CYP2C9	Cytochrome P450 Family 2 Subfamily C Member 9
CYP2D6	Cytochrome P450 Family 2 Subfamily D Member 6
CYP2E1	Cytochrome P450 Family 2 Subfamily E Member 1
CYP2F1	Cytochrome P450 Family 2 Subfamily F Member 1
CYP3A4	Cytochrome P450 Family 3 Subfamily A Member 4
CYP3A5	Cytochrome P450 Family 3 Subfamily A Member 5
CYP7A1	Cytochrome P450 Family 7 Subfamily A Member 1
CYP8B1	cytochrome P450 family 8 subfamily B member 1
DBH	Dopamine Beta-Hydroxylase
DBT	dihydrolipoamide branched chain transacylase E2
DDB1	damage specific DNA binding protein 1
DDC	DOPA decarboxylase (aromatic L-amino acid decarboxylase)
DGAT2	diacylglycerol O-acyltransferase 2
DGUOK	Deoxyguanosine kinase, mitochondrial
DHCR7	Delta-7-dehydrocholesterol reductase
DHDDS	dehydrodolichyl diphosphate synthase subunit
DHFR	Dihydrofolate Reductase
DHODH	Dihydroorotate Dehydrogenase (Quinone)
DHPS	Deoxyhypusine synthase
DHRS7	dehydrogenase/reductase 7
DLAT	dihydrolipoamide S-acetyltransferase
DLK1	Delta Like Non-Canonical Notch Ligand 1
DNAH8	Dynein Axonemal Heavy Chain 8
DNAJB9	DnaJ heat shock protein family (Hsp40) member B9
DNAJC12	DnaJ heat shock protein family (Hsp40) member C12
DNAJC15	DNAJ/HSP40 homolog, subfamily C, member 15
DNASE1	Deoxyribonuclease I
DNM1L	Dynamin 1 Like
DNMT1	DNA Methyltransferase 1
DNMT3A	DNA methyltransferase 3A
DNMT3B	DNA Methyltransferase 3 Beta
DSC2	desmocollin 2
DUSP19	Dual Specificity Phosphatase 19
E2F1	E2F Transcription Factor 1
ECHDC1	ethylmalonyl-CoA decarboxylase 1
ECHS1	enoyl-CoA hydratase, short chain 1
EDEM1	ER degradation enhancing alpha-mannosidase like protein 1
EDNRA	Endothelin Receptor Type A
EDNRB	Endothelin Receptor Type B
EGF	Epidermal Growth Factor
EGFR	Epidermal Growth Factor Receptor
EGR1	Early Growth Response 1
EHHADH	Enoyl-CoA Hydratase And 3-Hydroxyacyl CoA Dehydrogenase
EHMT2	Euchromatic Histone Lysine Methyltransferase 2
EIF2AK1	eukaryotic translation initiation factor 2 alpha kinase 1
EIF2AK2	Eukaryotic Translation Initiation Factor 2 Alpha Kinase 2
EIF4EBP2	eukaryotic translation initiation factor 4E binding protein 2
ENDOG	Endonuclease G
ENO1	enolase 1
EPHX1	Epoxide Hydrolase 1
EPHX2	Epoxide Hydrolase 2
EPO	Erythropoietin
ERBB2	Erb-B2 Receptor Tyrosine Kinase 2
ERCC1	ERCC Excision Repair 1, Endonuclease Non-Catalytic Subunit
ERCC2	ERCC Excision Repair 2, TFIIH Core Complex Helicase Subunit
ERLEC1	endoplasmic reticulum lectin 1
ERN1	endoplasmic reticulum to nucleus signaling 1
ESR1	Estrogen Receptor 1
ETNK2	Ethanolamine Kinase 2
ETV6	ETS variant transcription factor 6
F2	Coagulation Factor II, Thrombin
F2RL3	F2R like thrombin or trypsin receptor 3
F3	Coagulation Factor III, Tissue Factor
F9	Coagulation Factor IX
FABP1	fatty acid binding protein 1
FABP4	fatty acid binding protein 4
FADS1	fatty acid desaturase 1
FADS2	fatty acid desaturase 2
FANCI	FA Complementation Group I
FAS	Fas Cell Surface Death Receptor
FASLG	Fas Ligand
FASN	fatty acid synthase
FCGR2A	Fc fragment of IgG receptor IIa
FCGR2B	Fc fragment of IgG receptor Ia
FCMR	Fc fragment of IgM receptor
FDFT1	Farnesyl-Diphosphate Farnesyltransferase 1
FECH	Ferrochelatase
FFAR1	free fatty acid receptor 1
FGA	fibrinogen alpha chain
FGF21	Fibroblast Growth Factor 21
FIP1L1	Factor Interacting With PAPOLA And CPSF1
FLT1	fms related receptor tyrosine kinase 1
FLT3	fms-related tyrosine kinase-3
FMO3	flavin containing dimethylaniline monoxygenase 3
FN1	Fibronectin-1
FPGS	Folylpolyglutamate Synthase
FRMD8	FERM domain containing 8
FTL	ferritin light chain
G6PD	Glucose-6-Phosphate Dehydrogenase
GABPA	GA binding protein transcription factor subunit alpha
GADD45A	Growth Arrest And DNA Damage Inducible Alpha
GANAB	glucosidase II alpha subunit
GATA2	GATA-binding protein-2
GBA1	Glucosidase, acid beta
GC	GC Vitamin D Binding Protein
GCLC	Glutamate-Cysteine Ligase Catalytic Subunit
GCLM	Glutamate-Cysteine Ligase Modifier Subunit
GDA	guanine deaminase
GDI1	GDP dissociation inhibitor 1
GDNF	Glial cell line derived neurotrophic factor
GEM	GTP binding protein overexpressed in skeletal muscle
GGH	Gamma-Glutamyl Hydrolase
GGT1	Gamma-Glutamyltransferase 1
GLO1	Glyoxalase I
GLUD1	Glutamate Dehydrogenase 1
GLUD2	Glutamate dehydrogenase-2
GLUL	Glutamate-Ammonia Ligase
GNAS	GNAS Complex Locus
GNRH1	Gonadotropin Releasing Hormone 1
GOT1	Glutamic-Oxaloacetic Transaminase 1
GPD1	glycerol-3-phosphate dehydrogenase 1
GPT	Glutamic--Pyruvic Transaminase
GPX1	Glutathione Peroxidase 1
GPX3	Glutathione Peroxidase 3
GPX4	Glutathione Peroxidase 4
GRK4	G protein-coupled receptor kinase 4
GRPR	gastrin releasing peptide receptor
GSK3B	Glycogen Synthase Kinase 3 Beta
GSN	gelsolin
GSR	Glutathione-Disulfide Reductase
GSS	Glutathione Synthetase
GSTA1	Glutathione S-Transferase Alpha 1
GSTA4	glutathione S-transferase alpha 4
GSTK1	glutathione S-transferase kappa 1
GSTM1	Glutathione S-Transferase Mu 1
GSTM2	glutathione S-transferase mu 2
GSTM3	glutathione S-transferase mu 3
GSTM4	glutathione S-transferase mu 4
GSTO1	glutathione S-transferase omega 1
GSTP1	Glutathione S-Transferase Pi 1
GSTT1	Glutathione S-Transferase Theta 1
GTF2A1L	general transcription factor IIA subunit 1 like
GUSB	Glucuronidase Beta
GYS1	Glycogen Synthase 1
GYS2	Glycogen Synthase 2
GZMB	Granzyme B
HACL1	2-hydroxyacyl-CoA lyase 1
HADHA	hydroxyacyl-CoA dehydrogenase trifunctional multienzyme complex subunit alpha
HAO2	hydroxyacid oxidase 2
HAVCR1	hepatitis A virus cellular receptor 1
HBA2	hemoglobin subunit alpha 2
HBB	Hemoglobin Subunit Beta
HCP5	Major histocompatibility complex, class I, gene P5-1
HFE	Homeostatic Iron Regulator
HGF	Hepatocyte Growth Factor
HIF1A	Hypoxia Inducible Factor 1 Subunit Alpha
HLA-A	Major Histocompatibility Complex, Class I, A
HLA-B	Major Histocompatibility Complex, Class I, B
HLA-C	Major Histocompatibility Complex, Class I, C
HLA-DQA1	Major Histocompatibility Complex, Class II, DQ Alpha 1
HLA-DQB1	Major Histocompatibility Complex, Class II, DQ Beta 1
HLA-DRB1	Major Histocompatibility Complex, Class II, DR Beta 1
HLA-DRB5	Major Histocompatibility Complex, Class II, DR Beta 5
HMBS	Hydroxymethylbilane Synthase
HMGB1	High Mobility Group Box 1
HMGCR	3-Hydroxy-3-Methylglutaryl-CoA Reductase
HMGCS2	3-Hydroxy-3-Methylglutaryl-CoA Synthase 2
HMOX1	Heme Oxygenase 1
HNF1B	HNF1 Homeobox B
HNF4A	Hepatocyte Nuclear Factor 4 Alpha
HP	haptoglobin
HPD	4-hydroxyphenylpyruvate dioxygenase
HPGDS	hematopoietic prostaglandin D synthase
HPRT1	Hypoxanthine Phosphoribosyltransferase 1
HPX	Hemopexin
HRH1	Histamine receptor, subclass H1
HRH2	Histamine Receptor H2
HSF1	Heat Shock Transcription Factor 1
HSP90AA1	Heat Shock Protein 90 Alpha Family Class A Member 1
HSPA4	Heat Shock Protein Family A (Hsp70) Member 4
HSPA5	Heat Shock Protein Family A (Hsp70) Member 5
HSPB1	Heat Shock Protein Family B (Small) Member 1
HSPG2	heparan sulfate proteoglycan 2
HTR2C	5-hydroxytryptamine (serotonin) receptor-2C
ICAM1	Intercellular Adhesion Molecule 1
IFNA1	Interferon Alpha 1
IFNA2	Interferon Alpha 2
IFNG	Interferon Gamma
IGF1	Insulin Like Growth Factor 1
IGF2	Insulin Like Growth Factor 2
IL10	Interleukin 10
IL11	Interleukin 11
IL17A	Interleukin 17A
IL18	Interleukin 18
IL1A	interleukin 1 alpha
IL1B	Interleukin 1 Beta
IL1R1	Interleukin 1 Receptor Type 1
IL1R2	interleukin 1 receptor type 2
IL1RAPL2	Interleukin 1 Receptor Accessory Protein Like 2
IL1RN	interleukin 1 receptor antagonist
IL2	Interleukin 2
IL22	interleukin 22
IL2RA	Interleukin 2 Receptor Subunit Alpha
IL3	Interleukin 3
IL33	interleukin 33
IL36RN	Interleukin 36 receptor antagonist
IL4	Interleukin 4
IL4R	Interleukin 4 Receptor
IL6	Interleukin 6
IL7	Interleukin-7
IMMT	inner membrane mitochondrial protein
INPP5E	Inositol Polyphosphate-5-Phosphatase E
INS	Insulin
INSR	Insulin Receptor
IRAK1	interleukin 1 receptor associated kinase 1
IRF1	Interferon Regulatory Factor 1
IRS1	Insulin Receptor Substrate 1
IRS2	Insulin Receptor Substrate 2
IRS4	Insulin Receptor Substrate 4
ITGA4	Integrin, alpha-4 (antigen CD49D, alpha-4 subunit of VLA-4 receptor)
ITGB2	Integrin Subunit Beta 2
ITGB3	Integrin Subunit Beta 3
ITPA	Inosine Triphosphatase
ITPR1	inositol 1,4,5-trisphosphate receptor type 1
JAK2	Janus kinase 2
JUN	Jun Proto-Oncogene, AP-1 Transcription Factor Subunit
JUNB	JunB Proto-Oncogene, AP-1 Transcription Factor Subunit
JUND	JunD proto-oncogene, AP-1 transcription factor subunit
KCNE1	Potassium voltage-gated channel, Isk-related subfamily, member 1
KCNE2	Potassium voltage-gated channel, Isk-related family, member 2
KCNH2	Potassium Voltage-Gated Channel Subfamily H Member 2
KCNIP4	Potassium Voltage-Gated Channel Interacting Protein 4
KCNQ1	Potassium voltage-gated channel, KQT-like subfamily, member 1
KDR	Kinase Insert Domain Receptor
KEAP1	Kelch Like ECH Associated Protein 1
KIR2DL3	Killer Cell Immunoglobulin Like Receptor, Two Ig Domains And Long Cytoplasmic Tail 3
KIR2DS1	killer cell immunoglobulin like receptor, two Ig domains and short cytoplasmic tail 1
KIR3DL1	killer cell immunoglobulin like receptor, three Ig domains and long cytoplasmic tail 1
KIR3DL2	killer cell immunoglobulin like receptor, three Ig domains and long cytoplasmic tail 2
KIT	Hardy-Zuckerman 4 feline sarcoma (v-kit) oncogene
KITLG	KIT ligand
KLF5	Kruppel like factor 5
KLHL1	kelch like family member 1
KLK3	Kallikrein Related Peptidase 3
KLRK1	Killer Cell Lectin Like Receptor K1
KNG1	Kininogen 1
KRAS	KRAS protooncogene, GTPase
KRIT1	KRIT1 Ankyrin Repeat Containing
KRT18	Keratin 18
KRT19	Keratin 19
KRT20	keratin 20
KRT7	Keratin 7
KRT8	Keratin 8
KYAT1	Kynurenine Aminotransferase 1
LACTB	Lactamase Beta
LAP3	leucine aminopeptidase 3
LBP	lipopolysaccharide binding protein
LCN2	lipocalin 2
LDLR	Low Density Lipoprotein Receptor
LEP	Leptin
LEPR	Leptin Receptor
LEPROT	Leptin Receptor Overlapping Transcript
LGALS3	galectin 3
LMNA	Lamin A/C
LMX1A	LIM Homeobox Transcription Factor 1 Alpha
LPL	Lipoprotein Lipase
LPP	Lipoma-preferred-partner gene
LRAT	lecithin retinol acyltransferase
LRRK2	Leucine-rich repeat kinase 2 (dardarin)
LTB4R	leukotriene B4 receptor
LTC4S	Leukotriene C4 Synthase
LTF	lactotransferrin
MAOA	Monoamine Oxidase A
MAOB	Monoamine Oxidase B
MAP1LC3B	microtubule associated protein 1 light chain 3 beta
MAP3K5	Mitogen-Activated Protein Kinase Kinase Kinase 5
MAPK1	Mitogen-Activated Protein Kinase 1
MAPK14	Mitogen-Activated Protein Kinase 14
MAPK3	Mitogen-Activated Protein Kinase 3
MAPK8	Mitogen-Activated Protein Kinase 8
MAPK9	Mitogen-Activated Protein Kinase 9
MAPT	Microtubule-associated protein tau
MAT1A	methionine adenosyltransferase 1A
MB	Myoglobin
MBL2	Mannose Binding Lectin 2
MCCC1	methylcrotonoyl-CoA carboxylase 1
MCL1	MCL1 Apoptosis Regulator, BCL2 Family Member
MDH1	malate dehydrogenase 1
MDM2	MDM2 Proto-Oncogene
ME1	malic enzyme 1
MED1	mediator complex subunit 1
MIF	Macrophage Migration Inhibitory Factor
MIR7-3HG	MIR7-3 Host Gene
MKI67	Marker Of Proliferation Ki-67
MLKL	mixed lineage kinase domain like pseudokinase
MLLT10	ALL1 fused gene from chromosome 10
MLN	Motilin
MLXIP	MLX Interacting Protein
MMP2	Matrix Metallopeptidase 2
MMP9	Matrix Metallopeptidase 9
MPO	Myeloperoxidase
MS4A1	membrane spanning 4-domains A1
MST1	macrophage stimulating 1
MST1R	macrophage stimulating 1 receptor
MT2A	Metallothionein 2A
MT-CO2	Mitochondrially Encoded Cytochrome C Oxidase II
MTHFR	Methylenetetrahydrofolate Reductase
MT-ND6	Mitochondrially Encoded NADH:Ubiquinone Oxidoreductase Core Subunit 6
MTOR	Mechanistic Target Of Rapamycin Kinase
MTPN	myotrophin
NAGLU	N-Acetyl-Alpha-Glucosaminidase
NAT1	N-Acetyltransferase 1
NAT2	N-Acetyltransferase 2
NCOR1	Nuclear Receptor Corepressor 1
ND6	NADH dehydrogenase, subunit 6 (complex I)
NDUFS3	NADH:ubiquinone oxidoreductase core subunit S3
NDUFS4	NADH:Ubiquinone Oxidoreductase Subunit S4
NFE2L2	NFE2 Like BZIP Transcription Factor 2
NFKB1	Nuclear Factor Kappa B Subunit 1
NFXL1	nuclear transcription factor, X-box binding like 1
NLRP3	NLR Family Pyrin Domain Containing 3
NME2	NME/NM23 nucleoside diphosphate kinase 2
NOS2	Nitric Oxide Synthase 2
NOS3	Nitric Oxide Synthase 3
NOTCH1	notch receptor 1
NOX4	NADPH oxidase 4
NPC1	NPC intracellular cholesterol transporter 1
NPHP4	Nephrocystin 4
NPM1	Nucleophosmin 1 (nucleolar phosphoprotein B23, numatrin)
NPY4R	Neuropeptide Y Receptor Y4
NQO1	NAD(P)H Quinone Dehydrogenase 1
NR0B1	Nuclear Receptor Subfamily 0 Group B Member 1
NR0B2	nuclear receptor subfamily 0 group B member 2
NR1H2	Nuclear Receptor Subfamily 1 Group H Member 2
NR1H3	nuclear receptor subfamily 1 group H member 3
NR1H4	Nuclear Receptor Subfamily 1 Group H Member 4
NR1I2	Nuclear Receptor Subfamily 1 Group I Member 2
NR1I3	Nuclear Receptor Subfamily 1 Group I Member 3
NR2F2	nuclear receptor subfamily 2 group F member 2
NR3C1	Nuclear Receptor Subfamily 3 Group C Member 1
NR5A2	nuclear receptor subfamily 5 group A member 2
NREP	neuronal regeneration related protein
NUDT15	Nudix Hydrolase 15
NUP214	Nucleoporin, 214kD
OAS1	2'-5'-oligoadenylate synthetase 1
OCIAD1	OCIA domain containing 1
ODC1	Ornithine Decarboxylase 1
OGDH	Oxoglutarate Dehydrogenase
OPRM1	Opioid Receptor Mu 1
OR51E2	olfactory receptor family 51 subfamily E member 2
OSMR	Oncostatin M Receptor
OXA1L	OXA1L Mitochondrial Inner Membrane Protein
P2RY12	Purinergic receptor P2Y, G protein-coupled, 12
P4HB	Prolyl 4-Hydroxylase Subunit Beta
PAH	Phenylalanine Hydroxylase
PAN2	poly(A) specific ribonuclease subunit PAN2
PANX1	pannexin 1
PARD3B	Par-3 Family Cell Polarity Regulator Beta
PARK7	Parkinsonism associated deglycase
PARP1	Poly(ADP-Ribose) Polymerase 1
PC	pyruvate carboxylase
PCNA	Proliferating Cell Nuclear Antigen
PCOLCE	procollagen C-endopeptidase enhancer
PCYT1A	phosphate cytidylyltransferase 1, choline, alpha
PDGFRA	Platelet Derived Growth Factor Receptor Alpha
PDK4	Pyruvate Dehydrogenase Kinase 4
PDLIM5	PDZ and LIM domain 5
PEBP1	Phosphatidylethanolamine-binding protein 1
PECAM1	Platelet/endothelial cell adhesion molecule (CD31 antigen)
PEX11A	peroxisomal biogenesis factor 11 alpha
PGM1	phosphoglucomutase 1
PICALM	Phosphatidylinositol-binding clathrin assembly protein
PIEZO1	PIEZO1 ion channel
PIEZO2	PIEZO-type mechanosensitive ion channel component 2
PIK3C2A	Phosphatidylinositol-4-Phosphate 3-Kinase Catalytic Subunit Type 2 Alpha
PIK3CG	Phosphatidylinositol-4,5-Bisphosphate 3-Kinase Catalytic Subunit Gamma
PLAT	plasminogen activator, tissue type
PLAU	Plasminogen Activator, Urokinase
PLD2	phospholipase D2
PLG	Plasminogen
PLOD2	procollagen-lysine,2-oxoglutarate 5-dioxygenase 2
PLS3	plastin 3
PLXNA2	plexin A2
PMAIP1	Phorbol-12-myristate-13-acetate-induced protein 1
PNP	purine nucleoside phosphorylase
PNPLA3	Patatin Like Phospholipase Domain Containing 3
PNRC1	proline rich nuclear receptor coactivator 1
POLG	DNA Polymerase Gamma, Catalytic Subunit
POLR2G	RNA polymerase II subunit G
POLR3A	RNA polymerase III subunit A
POMC	Proopiomelanocortin
PON1	paraoxonase 1
POR	Cytochrome P450 Oxidoreductase
PPARA	Peroxisome Proliferator Activated Receptor Alpha
PPARD	Peroxisome Proliferator Activated Receptor Delta
PPARG	Peroxisome Proliferator Activated Receptor Gamma
PPARGC1A	PPARG Coactivator 1 Alpha
PPIG	Peptidylprolyl Isomerase G
PPOX	Protoporphyrinogen oxidase
PPTC7	protein phosphatase targeting COQ7
PRDX2	Peroxiredoxin 2
PRDX5	Peroxiredoxin 5
PRF1	Perforin 1
PRKAA1	Protein Kinase AMP-Activated Catalytic Subunit Alpha 1
PRKAA2	Protein Kinase AMP-Activated Catalytic Subunit Alpha 2
PRKAR1A	protein kinase cAMP-dependent type I regulatory subunit alpha
PRKCD	protein kinase C delta
PRKDC	protein kinase, DNA-activated, catalytic subunit
PRKN	Parkin RBR E3 ubiquitin protein ligase
PRL	Prolactin
PTF1A	pancreas associated transcription factor 1a
PTGES	prostaglandin E synthase
PTGS2	Prostaglandin-Endoperoxide Synthase 2
PTPA	Protein Phosphatase 2 Phosphatase Activator
PTPN1	Protein Tyrosine Phosphatase Non-Receptor Type 1
PTPN22	protein tyrosine phosphatase non-receptor type 22
PUM1	pumilio RNA binding family member 1
PYGL	glycogen phosphorylase L
PZP	PZP alpha-2-macroglobulin like
RASA1	RAS p21 protein activator 1
RASGRP1	RAS Guanyl Releasing Protein 1
RB1	RB Transcriptional Corepressor 1
RBM45	RNA binding motif protein 45
RBP1	retinol binding protein 1
RBP4	Retinol Binding Protein 4
RDH13	retinol dehydrogenase 13
RDH5	Retinol Dehydrogenase 5
REEP5	receptor accessory protein 5
RELA	RELA Proto-Oncogene, NF-KB Subunit
RET	Ret Proto-Oncogene
RGN	regucalcin
RHOA	Ras Homolog Family Member A
RIPK3	Receptor Interacting Serine/Threonine Kinase 3
RIPOR2	RHO Family Interacting Cell Polarization Regulator 2
RPS27A	Ribosomal Protein S27a
RTCA	RNA 3'-terminal phosphate cyclase
RUNX1	Runt-related transcription factor 1 (aml1 oncogene)
S100A1	S100 calcium binding protein A1
S100A11	S100 Calcium Binding Protein A11
S100A8	S100 calcium binding protein A8
S100A9	S100 calcium binding protein A9
S100B	S100 calcium binding protein B
SCARB1	Scavenger Receptor Class B Member 1
SCN1A	Sodium Voltage-Gated Channel Alpha Subunit 1
SDHB	Succinate Dehydrogenase Complex Iron Sulfur Subunit B
SELE	Selectin E
SELENBP1	selenium binding protein 1
SELL	Selectin L
SENP2	SUMO specific peptidase 2
SEPSECS	Sep (O-phosphoserine) tRNA:Sec (selenocysteine) tRNA synthase
SERPINA1	Serpin Family A Member 1
SERPINA6	serpin family A member 6
SERPING1	serpin family G member 1
SESN2	Sestrin 2
SFTA3	Surfactant Associated 3
SGF29	SAGA complex associated factor 29
SH3GL1	SH3 domain GRB2-like 1 (Extra 11-19 leukemia fusion gene)
SHBG	Sex Hormone Binding Globulin
SHC1	SHC Adaptor Protein 1
SIRT1	Sirtuin 1
SLC10A1	Solute Carrier Family 10 Member 1
SLC10A2	Solute Carrier Family 10 Member 2
SLC10A7	solute carrier family 10 member 7
SLC13A1	Solute Carrier Family 13 Member 1
SLC13A4	solute carrier family 13 member 4
SLC16A4	Solute Carrier Family 16 Member 4
SLC17A5	Solute Carrier Family 17 Member 5
SLC19A1	Solute Carrier Family 19 Member 1
SLC1A5	Solute Carrier Family 1 Member 5
SLC22A2	Solute Carrier Family 22 Member 2
SLC22A8	solute carrier family 22 member 8
SLC25A29	solute carrier family 25 member 29
SLC25A3	Solute Carrier Family 25 Member 3
SLC26A1	Solute Carrier Family 26 Member 1
SLC47A1	Solute Carrier Family 47 Member 1
SLC7A11	Solute Carrier Family 7 Member 11
SLC8A1	Solute Carrier Family 8 Member A1
SLCO1B1	Solute Carrier Organic Anion Transporter Family Member 1B1
SLCO1B3	Solute Carrier Organic Anion Transporter Family Member 1B3
SLCO2B1	solute carrier organic anion transporter family member 2B1
SLCO6A1	solute carrier organic anion transporter family member 6A1
SLPI	Secretory Leukocyte Peptidase Inhibitor
SMAD2	SMAD Family Member 2
SMAD5	SMAD family member 5
SMAD5-AS1	SMAD5 Antisense RNA 1
SMOX	Spermine Oxidase
SMPD1	Sphingomyelin Phosphodiesterase 1
SNX18	sorting nexin 18
SOCS6	suppressor of cytokine signaling 6
SOD1	Superoxide Dismutase 1
SOD2	Superoxide Dismutase 2
SOD3	superoxide dismutase 3
SORD	Sorbitol Dehydrogenase
SORL1	sortilin related receptor 1
SPG7	SPG7 matrix AAA peptidase subunit, paraplegin
SPIN2A	spindlin family member 2A
SPINK1	Serine Peptidase Inhibitor Kazal Type 1
SPP1	secreted phosphoprotein 1
SQLE	Squalene Epoxidase
SQSTM1	Sequestosome 1
SRP72	signal recognition particle 72
SRXN1	sulfiredoxin 1
SSRP1	structure specific recognition protein 1
ST6GAL1	ST6 beta-galactoside alpha-2,6-sialyltransferase 1
STAR	Steroidogenic Acute Regulatory Protein
STAT1	Signal Transducer And Activator Of Transcription 1
STAT3	Signal Transducer And Activator Of Transcription 3
STAT4	signal transducer and activator of transcription 4
STIM1	Stromal interaction molecule 1
STK11	Serine/Threonine Kinase 11
STON1	stonin 1
STON1-GTF2A1L	STON1-GTF2A1L readthrough
SULT1A1	Sulfotransferase Family 1A Member 1
SULT1C3	sulfotransferase family 1C member 3
SULT1E1	sulfotransferase family 1E member 1
SULT2B1	sulfotransferase family 2B member 1
SUOX	sulfite oxidase
SYCE1L	synaptonemal complex central element protein 1 like
TACR2	Tachykinin Receptor 2
TAGLN2	transgelin 2
TALDO1	transaldolase 1
TBC1D9	TBC1 domain family member 9
TBP	TATA box binding protein
TBXA2R	thromboxane A2 receptor
TCTN1	tectonic family member 1
TERT	Telomerase reverse transcriptase
TF	Transferrin
TFAP2A	Transcription Factor AP-2 Alpha
TFEB	Transcription Factor EB
TFPT	TCF3 Fusion Partner
TGFA	Transforming Growth Factor Alpha
TGFB1	Transforming Growth Factor Beta 1
TGFBR1	transforming growth factor beta receptor 1
TGFBR2	transforming growth factor beta receptor 2
TGFBRAP1	transforming growth factor beta receptor associated protein 1
TKT	Transketolase
TLR5	toll like receptor 5
TLR7	Toll Like Receptor 7
TLR9	toll like receptor 9
TLX1NB	TLX1 Neighbor
TMED7	transmembrane p24 trafficking protein 7
TMEM117	transmembrane protein 117
TMEM164	transmembrane protein 164
TMEM38B	transmembrane protein 38B
TMEM45A	Transmembrane protein 45A
TMPO	Thymopoietin
TNF	Tumor Necrosis Factor
TNFRSF10B	TNF Receptor Superfamily Member 10b
TNFRSF1A	TNF Receptor Superfamily Member 1A
TNFRSF1B	TNF Receptor Superfamily Member 1B
TNFSF10	TNF Superfamily Member 10
TNNI3	Troponin I3, Cardiac Type
TOP1	DNA Topoisomerase I
TOP2B	Topoisomerase (DNA) II, beta, 180kD
TP53	Tumor Protein P53
TPMT	Thiopurine S-Methyltransferase
TPO	Thyroid Peroxidase
TREX1	3' repair exonuclease 1
TRIM13	tripartite motif containing 13
TRMU	tRNA 5-methylaminomethyl-2-thiouridylate methyltransferase
TSBP1	Testis Expressed Basic Protein 1
TSPAN12	Tetraspanin 12
TTR	transthyretin
TUBA1A	tubulin alpha 1a
TUBB4B	tubulin beta 4B class IVb
TXNRD1	Thioredoxin Reductase 1
TYMP	Thymidine phosphorylase
TYMS	Thymidylate Synthetase
UBA5	ubiquitin like modifier activating enzyme 5
UBC	Ubiquitin C
UBE2B	Ubiquitin Conjugating Enzyme E2 B
UCP1	Uncoupling Protein 1
UCP2	Uncoupling Protein 2
UGT1A1	UDP Glucuronosyltransferase Family 1 Member A1
UGT1A10	UDP Glucuronosyltransferase Family 1 Member A10
UGT1A3	UDP Glucuronosyltransferase Family 1 Member A3
UGT1A4	UDP Glucuronosyltransferase Family 1 Member A4
UGT1A6	UDP Glucuronosyltransferase Family 1 Member A6
UGT1A9	UDP Glucuronosyltransferase Family 1 Member A9
UGT2B15	UDP Glucuronosyltransferase Family 2 Member B15
UGT2B7	UDP Glucuronosyltransferase Family 2 Member B7
UNC93B1	unc-93 homolog B1, TLR signaling regulator
UROD	Uroporphyrinogen Decarboxylase
USP5	ubiquitin specific peptidase 5
VDR	Vitamin D Receptor
VEGFA	vascular endothelial growth factor A
VIM	vimentin
VWF	von Willebrand factor
WASL	WASP like actin nucleation promoting factor
WDR26	WD repeat domain 26
XDH	Xanthine Dehydrogenase
XPO1	Exportin 1
XPR1	xenotropic and polytropic retrovirus receptor 1
XYLB	xylulokinase
XYLT2	xylosyltransferase 2
ZBTB17	Zinc finger- and BTB domain-containing protein 17
ZDHHC23	zinc finger DHHC-type palmitoyltransferase 23
ZNF706	Zinc finger protein 706
