# Supplementary material for: Potential Hepatoprotective Effects of Chamaecyparis lawsoniana against Methotrexate-Induced Liver Injury: Integrated Phytochemical Profiling, Target Network Analysis, and Experimental Validation
Source: Antioxidants (Basel). 2023 Dec 14;12(12):2118. doi: 10.3390/antiox12122118 (PMC10740566; doi:10.3390/antiox12122118)
Supplement: Supplementary file 1 [file antioxidants-12-02118-s001.zip › Table S6.xlsx]

## Sheet: Overlapping targets
ABCB1
ABCC1
ABCG2
ACE
ACHE
ADA
ADH1A
ADH1B
ADH1C
ADORA3
ADRB3
AHR
AKR1A1
AKT2
ALAD
ALB
ALK
ALOX5
ANPEP
ANXA5
ARG1
BCHE
BCL2
BLVRB
CA3
CASP2
CASP3
CASP8
CAT
CCL5
CCR2
CDC25B
CDC25C
CDC42
CDK1
CDK4
CDK9
CES1
CES2
CFTR
CHEK1
COMT
CPT1A
CRYZ
CXCR2
CYP17A1
CYP2C19
CYP2C8
CYP2C9
CYP3A4
DHFR
DHODH
DNMT1
DNMT3B
EDNRA
EDNRB
EGFR
EHMT2
EPHX2
ERBB2
ERN1
ESR1
F2
F3
F9
FABP1
FABP4
FADS1
FDFT1
FECH
FFAR1
FLT1
FLT3
FPGS
G6PD
GC
GLO1
GLUL
GSK3B
GSR
GSS
GSTA1
GSTK1
GSTM1
GSTM2
GSTO1
GSTP1
HAO2
HIF1A
HMGCR
HMOX1
HNF4A
HPRT1
HSP90AA1
HSPA5
HTR2C
IGF1
IL1B
IL2
IL6
INSR
ITGA4
ITGB3
ITPR1
JAK2
JUN
KDR
KIT
KYAT1
LAP3
LCN2
LGALS3
LRRK2
LTB4R
LTF
MAOA
MAOB
MAP3K5
MAPK1
MAPK14
MAPK3
MAPK8
MAPT
MCL1
MDM2
MIF
MMP2
MMP9
MPO
MTOR
NME2
NOS2
NOS3
NOX4
NQO1
NR1H2
NR1H3
NR1H4
NR1I2
NR1I3
NR3C1
ODC1
OPRM1
PAH
PARP1
PIK3CG
PLAT
PLAU
PLG
PNP
PPARA
PPARD
PPARG
PRDX5
PRKCD
PRKDC
PTGES
PTGS2
PTPN1
PTPN22
PYGL
RBP4
RELA
RET
RHOA
S100A9
SELE
SELL
SERPINA1
SERPINA6
SHBG
SLC19A1
SOD2
SORD
ST6GAL1
STAT1
SULT1A1
SULT1E1
SULT2B1
TACR2
TBXA2R
TERT
TGFBR1
TGFBR2
TKT
TNF
TOP1
TP53
TTR
TYMP
TYMS
UGT2B7
VDR
VEGFA
XDH
