# Supplementary material for: Potential Hepatoprotective Effects of Chamaecyparis lawsoniana against Methotrexate-Induced Liver Injury: Integrated Phytochemical Profiling, Target Network Analysis, and Experimental Validation
Source: Antioxidants (Basel). 2023 Dec 14;12(12):2118. doi: 10.3390/antiox12122118 (PMC10740566; doi:10.3390/antiox12122118)
Supplement: Supplementary file 1 [file antioxidants-12-02118-s001.zip › Table S7.xlsx]

## Sheet: All genes 0.7
Core genes in PPI network ranked by Degree method
Rank	Name	Score
1	TP53	59
2	IL6	50
3	HSP90AA1	46
3	TNF	46
5	EGFR	44
6	IL1B	43
7	BCL2	42
8	CASP3	37
8	JUN	37
10	ALB	36
11	MMP9	35
12	HIF1A	34
13	ESR1	30
14	PTGS2	29
15	STAT1	28
16	MAPK3	26
17	ERBB2	25
18	MAPK1	24
19	RELA	23
19	MAPK8	23
19	JAK2	23
22	MAPK14	22
22	MTOR	22
22	IGF1	22
25	CASP8	21
25	PPARG	21
25	CYP3A4	21
28	PARP1	20
29	GSTP1	18
29	RHOA	18
31	HMOX1	17
32	MMP2	16
32	AKT2	16
32	MDM2	16
32	PPARA	16
32	GSK3B	16
32	CYP2C9	16
32	GSTM1	16
39	IL2	15
39	GSR	15
39	CDK1	15
39	KDR	15
39	GSTA1	15
39	MCL1	15
45	CCL5	14
45	CYP2C19	14
45	CDC42	14
45	CDK4	14
49	ANXA5	13
50	HSPA5	12
50	MPO	12
50	F2	12
50	F3	12
50	CHEK1	12
50	CYP2C8	12
50	NOS3	12
50	GSTO1	12
58	KIT	11
58	MAPT	11
58	MAOB	11
58	NR3C1	11
58	PLG	11
58	GSTM2	11
64	NQO1	10
64	ADH1A	10
64	ADH1B	10
64	ADH1C	10
64	MAOA	10
64	PRKDC	10
64	MAP3K5	10
64	UGT2B7	10
64	NOS2	10
64	ACE	10
74	XDH	9
74	CXCR2	9
74	SELE	9
74	GSS	9
74	PLAU	9
79	CCR2	8
79	ARG1	8
79	GC	8
79	LCN2	8
83	LRRK2	7
83	PRKCD	7
83	ERN1	7
83	ITGB3	7
83	TERT	7
83	SOD2	7
83	CDC25C	7
83	ANPEP	7
83	LGALS3	7
83	COMT	7
83	TYMS	7
83	SELL	7
95	PNP	6
95	PTPN1	6
95	HNF4A	6
95	PIK3CG	6
95	TTR	6
95	SERPINA1	6
95	NR1I2	6
95	DHFR	6
95	FLT1	6
95	DNMT1	6
95	ALK	6
95	ABCG2	6
107	ITPR1	5
107	FABP1	5
107	INSR	5
107	TGFBR1	5
107	LTF	5
107	PLAT	5
107	BCHE	5
107	ACHE	5
107	CDC25B	5
107	ALOX5	5
107	COL18A1	5
107	ABCB1	5
107	EDNRB	5
107	FABP4	5
107	TGFBR2	5
122	CES1	4
122	TOP1	4
122	MIF	4
122	SULT2B1	4
122	EPHX2	4
122	SHBG	4
122	SULT1E1	4
122	HMGCR	4
122	LAP3	4
122	EHMT2	4
122	ITGA4	4
122	RET	4
122	CASP2	4
122	ADA	4
136	PPARD	3
136	RBP4	3
136	HPRT1	3
136	CES2	3
136	NR1I3	3
136	NR1H3	3
136	TYMP	3
136	F9	3
136	GLO1	3
136	FECH	3
136	SLC19A1	3
136	SERPINA6	3
136	FPGS	3
136	DNMT3B	3
136	FLT3	3
136	G6PD	3
136	CDK9	3
153	SULT1A1	2
153	KYAT1	2
153	AHR	2
153	CFTR	2
153	CPT1A	2
153	CAT	2
153	CRYZ	2
153	GLUL	2
153	TKT	2
153	PRDX5	2
153	CYP17A1	2
153	GSTK1	2
153	PTGES	2
153	DHODH	2
153	EDNRA	2
153	OPRM1	2
153	ODC1	2
153	NR1H4	2
153	BLVRB	2
172	LTB4R	1
172	ADRB3	1
172	NOX4	1
172	FADS1	1
172	NR1H2	1
172	FFAR1	1
172	HAO2	1
172	ALAD	1
172	HTR2C	1
172	FDFT1	1
172	PAH	1
172	PTPN22	1
172	ABCC1	1
172	CYP27B1	1
