# Supplementary material for: Potential Hepatoprotective Effects of Chamaecyparis lawsoniana against Methotrexate-Induced Liver Injury: Integrated Phytochemical Profiling, Target Network Analysis, and Experimental Validation
Source: Antioxidants (Basel). 2023 Dec 14;12(12):2118. doi: 10.3390/antiox12122118 (PMC10740566; doi:10.3390/antiox12122118)
Supplement: Supplementary file 1 [file antioxidants-12-02118-s001.zip › Table S8.xlsx]

## Sheet: Bp_p-value 0.05
Category	Term	Count	%	PValue	Genes	List Total	Pop Hits	Pop Total	Fold Enrichment	Bonferroni	Benjamini	FDR	Negative log10 pvalue
GOTERM_BP_DIRECT	GO:0009410~response to xenobiotic stimulus	34	17.4359	1.93286e-27	RET, ABCB1, MAOB, AHR, TYMS, PTGS2, TNF, ALAD, PNP, TBXA2R, CASP3, FPGS, HMOX1, BCHE, ABCC1, JUN, CPT1A, HSP90AA1, ACE, STAT1, ARG1, MMP2, SORD, SOD2, RHOA, TGFBR2, CDK9, CDK4, CAT, BCL2, CDK1, PPARG, TOP1, TP53	194	253	19414	13.4484	5.64976e-24	5.64976e-24	5.17621e-24	26.7138
GOTERM_BP_DIRECT	GO:0043066~negative regulation of apoptotic process	40	20.5128	3.00658e-23	GSK3B, PRKDC, GSTP1, GLO1, MPO, TNF, RELA, EGFR, MAPK8, PRDX5, EDNRB, CASP3, AKT2, ERBB2, KDR, CASP2, MCL1, NQO1, HSPA5, ANXA5, NME2, NR1H4, IGF1, MIF, SOD2, MMP9, TGFBR1, IL2, MTOR, VEGFA, FABP1, IL6, CAT, ALB, BCL2, CDK1, MDM2, TP53, LTF, PPARD	194	522	19414	7.66837	8.78823e-20	4.39411e-20	4.02581e-20	22.5219
GOTERM_BP_DIRECT	GO:0006805~xenobiotic metabolic process	18	9.23077	1.27127e-15	NQO1, BCHE, ABCC1, ABCB1, GSTP1, NR1I2, AHR, CYP3A4, CYP2C19, SULT1A1, CYP2C9, CYP2C8, HNF4A, FPGS, GSTA1, ADA, UGT2B7, CES2	194	113	19414	15.9407	3.5697e-12	1.23865e-12	1.13482e-12	14.8958
GOTERM_BP_DIRECT	GO:0045471~response to ethanol	17	8.71795	9.5257e-15	NQO1, G6PD, ST6GAL1, CPT1A, MAOB, EHMT2, TYMS, TNF, RHOA, IL2, ALAD, CASP8, CA3, TBXA2R, CAT, CDK1, PPARA	194	107	19414	15.8993	2.79086e-11	6.9609e-12	6.37745e-12	14.0211
GOTERM_BP_DIRECT	GO:0010628~positive regulation of gene expression	30	15.3846	3.1934e-14	RET, GSK3B, DNMT1, ITGB3, NR1I2, PTPN22, HIF1A, TNF, RELA, MAPK8, ERBB2, DNMT3B, MAPK1, MAPK3, NOS3, VDR, EPHX2, NR1H2, IGF1, MAPK14, F3, TGFBR1, MTOR, VEGFA, IL6, IL1B, CDK1, PPARG, TP53, PPARD	194	512	19414	5.8636	9.34612e-11	1.75168e-11	1.60486e-11	13.4957
GOTERM_BP_DIRECT	GO:0001666~response to hypoxia	19	9.74359	3.59565e-14	ACE, NOS2, MMP2, ITPR1, PLAT, SOD2, HIF1A, TNF, RHOA, TGFBR2, VEGFA, ALAD, EDNRA, PLAU, CASP3, CAT, HMOX1, PPARA, ADA	194	161	19414	11.8098	1.05144e-10	1.75168e-11	1.60486e-11	13.4442
GOTERM_BP_DIRECT	GO:0032496~response to lipopolysaccharide	17	8.71795	9.87116e-13	NQO1, ACE, MAOB, NOS2, NOS3, PTPN22, OPRM1, PTGS2, SOD2, SELE, MPO, ALAD, CASP8, IL1B, CASP3, JAK2, S100A9	194	143	19414	11.8967	2.88529e-09	4.12191e-10	3.77642e-10	12.0056
GOTERM_BP_DIRECT	GO:0030335~positive regulation of cell migration	21	10.7692	1.8489e-12	RET, FLT1, HSPA5, MMP2, INSR, IGF1, SOD2, F3, MMP9, RHOA, EGFR, TGFBR1, VEGFA, CDC42, PLAU, IL1B, CCL5, AKT2, KIT, KDR, JAK2	194	262	19414	8.02105	5.4042e-09	6.75541e-10	6.18918e-10	11.7331
GOTERM_BP_DIRECT	GO:0043406~positive regulation of MAP kinase activity	13	6.66667	1.38158e-11	FLT1, FLT3, INSR, LRRK2, MIF, TNF, EGFR, PIK3CG, VEGFA, IL1B, KIT, ERBB2, NOX4	194	77	19414	16.8953	4.03837e-08	4.48707e-09	4.11097e-09	10.8596
GOTERM_BP_DIRECT	GO:0042178~xenobiotic catabolic process	9	4.61538	2.34122e-11	CYP2C9, GSTM2, CYP2C8, GSTM1, GSTO1, NR1I2, CYP2C19, CYP3A4, CRYZ	194	22	19414	40.9386	6.84337e-08	6.22125e-09	5.6998e-09	10.6306
GOTERM_BP_DIRECT	GO:0046686~response to cadmium ion	9	4.61538	2.34122e-11	ALAD, TERT, ARG1, GSS, KIT, CAT, CDK1, SORD, SOD2	194	22	19414	40.9386	6.84337e-08	6.22125e-09	5.6998e-09	10.6306
GOTERM_BP_DIRECT	GO:0014068~positive regulation of phosphatidylinositol 3-kinase signaling	13	6.66667	5.31803e-11	FLT1, FLT3, INSR, IGF1, F2, TNF, VEGFA, CCL5, KIT, CAT, KDR, JAK2, PPARD	194	86	19414	15.1272	1.55446e-07	1.29538e-08	1.18681e-08	10.2742
GOTERM_BP_DIRECT	GO:0071222~cellular response to lipopolysaccharide	17	8.71795	7.72507e-11	NOS2, ARG1, GSTP1, NR1H4, NR1H3, MAPK14, TNF, RHOA, RELA, IL6, MAPK8, EDNRB, TBXA2R, CDK4, IL1B, JAK2, PPARD	194	190	19414	8.95383	2.25804e-07	1.67939e-08	1.53863e-08	10.1121
GOTERM_BP_DIRECT	GO:0043410~positive regulation of MAPK cascade	16	8.20513	8.04361e-11	ALK, RET, FLT1, FLT3, INSR, IGF1, TNF, TGFBR1, VEGFA, CDC42, IL6, ADRB3, KIT, ERBB2, KDR, JAK2	194	162	19414	9.88367	2.35115e-07	1.67939e-08	1.53863e-08	10.0945
GOTERM_BP_DIRECT	GO:0018107~peptidyl-threonine phosphorylation	12	6.15385	9.14271e-11	GSK3B, MAPK8, PRKDC, LRRK2, CHEK1, PRKCD, BCL2, CDK1, MAPK1, TGFBR1, MTOR, TGFBR2	194	70	19414	17.1552	2.67241e-07	1.78161e-08	1.63228e-08	10.0389
GOTERM_BP_DIRECT	GO:0098869~cellular oxidant detoxification	12	6.15385	1.70616e-10	FABP1, GSTK1, PRDX5, GSTM2, GSTO1, GSTP1, ALB, GSR, GSTA1, PTGS2, S100A9, PTGES	194	74	19414	16.2279	4.98711e-07	3.11694e-08	2.85569e-08	9.76798
GOTERM_BP_DIRECT	GO:0008284~positive regulation of cell proliferation	25	12.8205	9.38798e-10	FLT1, FLT3, ODC1, RELA, EGFR, EDNRB, AKT2, ERBB2, CXCR2, KDR, INSR, IGF1, MIF, F2, TGFBR1, IL2, TGFBR2, CDC25B, VEGFA, IL6, CDK4, IL1B, KIT, BCL2, MDM2	194	541	19414	4.62441	2.7441e-06	1.53332e-07	1.4048e-07	9.02743
GOTERM_BP_DIRECT	GO:0006749~glutathione metabolic process	10	5.12821	9.44224e-10	GSTK1, GSTM2, G6PD, GSTM1, GSTO1, GLO1, GSTP1, GSR, GSTA1, SOD2	194	48	19414	20.8484	2.75996e-06	1.53332e-07	1.4048e-07	9.02492
GOTERM_BP_DIRECT	GO:1904707~positive regulation of vascular smooth muscle cell proliferation	10	5.12821	2.39055e-09	ERN1, DNMT1, JUN, TERT, MMP2, IGF1, JAK2, TNF, MMP9, MAP3K5	194	53	19414	18.8815	6.98756e-06	3.49379e-07	3.20095e-07	8.6215
GOTERM_BP_DIRECT	GO:1902895~positive regulation of pri-miRNA transcription from RNA polymerase II promoter	10	5.12821	2.39055e-09	JUN, TERT, NR1H2, PPARG, NR3C1, HIF1A, TNF, TP53, RELA, EGFR	194	53	19414	18.8815	6.98756e-06	3.49379e-07	3.20095e-07	8.6215
GOTERM_BP_DIRECT	GO:0006915~apoptotic process	26	13.3333	2.52103e-09	AHR, NR3C1, PRDX5, CASP8, CASP3, CHEK1, CASP2, MAPK1, JAK2, MCL1, MAPK3, JUN, PARP1, PRKCD, MAPK14, MMP9, TGFBR1, TGFBR2, IL1B, BCL2, CDK1, LCN2, MDM2, S100A9, TP53, PPARD	194	616	19414	4.22383	7.36894e-06	3.50903e-07	3.21491e-07	8.59842
GOTERM_BP_DIRECT	GO:0006468~protein phosphorylation	24	12.3077	4.06176e-09	RET, GSK3B, PRKDC, INSR, LRRK2, PRKCD, TGFBR1, MTOR, PIK3CG, CDC25B, TGFBR2, CDK9, ERN1, CDC42, EDNRA, MAPK8, CDK4, ERBB2, CHEK1, CDK1, MAPK1, JAK2, MAP3K5, MAPK3	194	536	19414	4.48084	1.18724e-05	5.3966e-07	4.94427e-07	8.39129
GOTERM_BP_DIRECT	GO:0043065~positive regulation of apoptotic process	19	9.74359	4.95137e-09	JUN, ACE, PRKDC, MMP2, PTGS2, TNF, MMP9, TGFBR1, IL6, MAPK8, CASP8, CASP3, BCL2, CASP2, HMOX1, PPARG, TP53, MCL1, MAP3K5	194	327	19414	5.81459	1.44727e-05	6.29254e-07	5.76511e-07	8.30527
GOTERM_BP_DIRECT	GO:0048661~positive regulation of smooth muscle cell proliferation	10	5.12821	5.50385e-09	IL6, STAT1, CCL5, MMP2, ITGB3, HMOX1, IGF1, PTGS2, TNF, TGFBR2	194	58	19414	17.2538	1.60876e-05	6.70323e-07	6.14138e-07	8.25933
GOTERM_BP_DIRECT	GO:0006954~inflammatory response	21	10.7692	1.08891e-08	NOS2, NR1H4, MIF, PTGS2, SELE, TNF, MTOR, PIK3CG, RELA, LTB4R, PRDX5, IL6, TBXA2R, IL1B, ADORA3, CCL5, KIT, CXCR2, NOX4, S100A9, CCR2	194	428	19414	4.91008	3.18283e-05	1.27315e-06	1.16644e-06	7.96301
GOTERM_BP_DIRECT	GO:0010629~negative regulation of gene expression	18	9.23077	1.35828e-08	GSK3B, DNMT1, ACE, NOS2, NR1H2, PTPN22, IGF1, MIF, HIF1A, ESR1, TNF, VEGFA, TERT, KDR, CDK1, PPARG, MAPT, XDH	194	309	19414	5.82945	3.97016e-05	1.52702e-06	1.39903e-06	7.86701
GOTERM_BP_DIRECT	GO:0045429~positive regulation of nitric oxide biosynthetic process	9	4.61538	1.55803e-08	HSP90AA1, IL1B, INSR, OPRM1, JAK2, SOD2, PTGS2, ESR1, TNF	194	46	19414	19.5793	4.55402e-05	1.68671e-06	1.54533e-06	7.80742
GOTERM_BP_DIRECT	GO:0030522~intracellular receptor signaling pathway	8	4.10256	1.84914e-08	NR1I3, HNF4A, NR1I2, NR1H4, NR1H3, AHR, PPARA, PPARD	194	31	19414	25.8251	5.4049e-05	1.87652e-06	1.71923e-06	7.73303
GOTERM_BP_DIRECT	GO:0014823~response to activity	9	4.61538	1.86175e-08	ALAD, IL6, MMP2, ITGB3, CAT, CDK1, SOD2, TNF, PPARD	194	47	19414	19.1628	5.44176e-05	1.87652e-06	1.71923e-06	7.73008
GOTERM_BP_DIRECT	GO:0046677~response to antibiotic	8	4.10256	2.95408e-08	HSP90AA1, CPT1A, CASP8, ADRB3, CASP3, MDM2, JAK2, TP53	194	33	19414	24.2599	8.63441e-05	2.82055e-06	2.58414e-06	7.52958
GOTERM_BP_DIRECT	GO:0001934~positive regulation of protein phosphorylation	15	7.69231	2.99135e-08	HSP90AA1, ITGB3, INSR, LRRK2, F2, TNF, MMP9, EGFR, VEGFA, EDNRB, IL1B, AKT2, ERBB2, KDR, MAPK3	194	213	19414	7.04734	8.74333e-05	2.82055e-06	2.58414e-06	7.52413
GOTERM_BP_DIRECT	GO:0034614~cellular response to reactive oxygen species	9	4.61538	3.09868e-08	PRDX5, JUN, MAPK8, MMP2, MAPK1, MAPT, MMP9, EGFR, MAPK3	194	50	19414	18.013	9.05704e-05	2.83045e-06	2.59321e-06	7.50882
GOTERM_BP_DIRECT	GO:0010887~negative regulation of cholesterol storage	6	3.07692	4.05779e-08	NR1H2, NR1H3, PPARG, PPARA, CES1, PPARD	194	11	19414	54.5848	0.000118602	3.59421e-06	3.29296e-06	7.39171
GOTERM_BP_DIRECT	GO:0018105~peptidyl-serine phosphorylation	14	7.17949	4.30827e-08	GSK3B, PRKDC, LRRK2, PRKCD, MAPK14, TGFBR1, MTOR, TGFBR2, MAPK8, AKT2, BCL2, CDK1, MAPK1, TOP1	194	185	19414	7.57303	0.000125923	3.70385e-06	3.3934e-06	7.3657
GOTERM_BP_DIRECT	GO:0051384~response to glucocorticoid	9	4.61538	8.98718e-08	ALAD, BCHE, IL6, CASP3, BCL2, TYMS, PTGS2, TNF, RHOA	194	57	19414	15.8009	0.000262661	7.50558e-06	6.87648e-06	7.04638
GOTERM_BP_DIRECT	GO:0045766~positive regulation of angiogenesis	13	6.66667	9.27664e-08	FLT1, NOS3, ITGB3, F3, HIF1A, TGFBR2, VEGFA, TERT, TBXA2R, IL1B, CXCR2, KDR, HMOX1	194	164	19414	7.93255	0.00027112	7.53212e-06	6.90079e-06	7.03261
GOTERM_BP_DIRECT	GO:0071456~cellular response to hypoxia	12	6.15385	1.00022e-07	FABP1, TERT, MDM2, BCL2, HMOX1, PPARG, PTGS2, HIF1A, TP53, MTOR, PPARD, VEGFA	194	134	19414	8.96169	0.00029232	7.9017e-06	7.2394e-06	6.99991
GOTERM_BP_DIRECT	GO:0006919~activation of cysteine-type endopeptidase activity involved in apoptotic process	10	5.12821	1.10773e-07	RET, CASP8, CASP2, PPARG, MAPT, JAK2, TNF, F3, S100A9, XDH	194	81	19414	12.3546	0.000323738	8.52081e-06	7.80661e-06	6.95556
GOTERM_BP_DIRECT	GO:0031663~lipopolysaccharide-mediated signaling pathway	8	4.10256	1.72972e-07	NOS3, CCL5, IL1B, MAPK1, PTPN22, MAPK14, TNF, MAPK3	194	42	19414	19.0614	0.000505469	1.2964e-05	1.18774e-05	6.76202
GOTERM_BP_DIRECT	GO:0042752~regulation of circadian rhythm	9	4.61538	2.26856e-07	GSK3B, MAPK8, PRKDC, HNF4A, CDK1, NR1H3, PPARG, PPARA, MTOR	194	64	19414	14.0726	0.000662879	1.65775e-05	1.5188e-05	6.64425
GOTERM_BP_DIRECT	GO:0046777~protein autophosphorylation	13	6.66667	2.41335e-07	ALK, GSK3B, FLT1, FLT3, INSR, LRRK2, EGFR, MTOR, ERN1, KIT, ERBB2, KDR, JAK2	194	179	19414	7.26781	0.000705174	1.69186e-05	1.55005e-05	6.61738
GOTERM_BP_DIRECT	GO:0045893~positive regulation of transcription, DNA-templated	25	12.8205	2.43099e-07	RET, NR1I2, AHR, HIF1A, TNF, RELA, EGFR, HNF4A, MAP3K5, JUN, STAT1, NR1H2, INSR, NME2, NR1H4, NR1H3, IGF1, ESR1, TGFBR1, IL6, IL1B, PPARG, PPARA, TP53, PPARD	194	724	19414	3.45553	0.000710327	1.69186e-05	1.55005e-05	6.61422
GOTERM_BP_DIRECT	GO:0070301~cellular response to hydrogen peroxide	9	4.61538	2.56511e-07	ERN1, FABP1, NQO1, IL6, ARG1, PRKCD, CDK1, RELA, MAP3K5	194	65	19414	13.8561	0.0007495	1.74368e-05	1.59753e-05	6.59089
GOTERM_BP_DIRECT	GO:0001525~angiogenesis	15	7.69231	2.7798e-07	JUN, FLT1, NOS3, MMP2, PTGS2, MAPK14, HIF1A, PIK3CG, TYMP, VEGFA, CASP8, ANPEP, KDR, HMOX1, GLUL	194	255	19414	5.8866	0.000812205	1.84667e-05	1.69189e-05	6.55599
GOTERM_BP_DIRECT	GO:0007596~blood coagulation	10	5.12821	3.05547e-07	SERPINA1, F9, PLAU, HNF4A, ITGB3, ANXA5, PLG, PLAT, F2, F3	194	91	19414	10.9969	0.000892714	1.9847e-05	1.81834e-05	6.51492
GOTERM_BP_DIRECT	GO:0050796~regulation of insulin secretion	8	4.10256	3.31845e-07	IL6, CPT1A, NOS2, CCL5, ALOX5, IL1B, HNF4A, TNF	194	46	19414	17.4039	0.000969512	2.08838e-05	1.91334e-05	6.47907
GOTERM_BP_DIRECT	GO:0030307~positive regulation of cell growth	10	5.12821	3.35799e-07	CDC42, ERBB2, BCL2, F2, S100A9, RHOA, EGFR, TGFBR1, IL2, MTOR	194	92	19414	10.8774	0.000981058	2.08838e-05	1.91334e-05	6.47392
GOTERM_BP_DIRECT	GO:0034599~cellular response to oxidative stress	10	5.12821	3.68617e-07	NQO1, PRDX5, EDNRA, ABCC1, G6PD, MAPK8, PARP1, LRRK2, GSR, SOD2	194	93	19414	10.7604	0.00107689	2.24472e-05	2.05657e-05	6.43343
GOTERM_BP_DIRECT	GO:0006979~response to oxidative stress	11	5.64103	3.92305e-07	ALAD, NQO1, PRDX5, MAPK8, CA3, GSS, LRRK2, HMOX1, PTGS2, MPO, TP53	194	122	19414	9.0229	0.00114605	2.34022e-05	2.14407e-05	6.40638
GOTERM_BP_DIRECT	GO:0042060~wound healing	10	5.12821	4.04181e-07	CASP3, ITGB3, ERBB2, IGF1, OPRM1, PPARA, TGFBR1, TGFBR2, MAP3K5, PPARD	194	94	19414	10.646	0.00118072	2.36284e-05	2.16479e-05	6.39342
GOTERM_BP_DIRECT	GO:0070374~positive regulation of ERK1 and ERK2 cascade	14	7.17949	4.19613e-07	JUN, ITGB3, HTR2C, PTPN22, IGF1, MIF, OPRM1, TNF, EGFR, VEGFA, CCL5, KDR, NOX4, MAPK3	194	225	19414	6.22671	0.00122578	2.40496e-05	2.20338e-05	6.37715
GOTERM_BP_DIRECT	GO:0033674~positive regulation of kinase activity	9	4.61538	5.13875e-07	RET, ALK, FLT1, FLT3, INSR, ERBB2, KIT, KDR, EGFR	194	71	19414	12.6852	0.00150093	2.88857e-05	2.64646e-05	6.28914
GOTERM_BP_DIRECT	GO:1901687~glutathione derivative biosynthetic process	5	2.5641	6.42448e-07	GSTM2, GSTM1, GSTP1, GSTA1, AKR1A1	194	8	19414	62.5451	0.00187612	3.54316e-05	3.24618e-05	6.19216
GOTERM_BP_DIRECT	GO:0051897~positive regulation of protein kinase B signaling	11	5.64103	6.5917e-07	RET, HSP90AA1, INSR, NOX4, IGF1, TNF, F3, EGFR, TGFBR1, PIK3CG, VEGFA	194	129	19414	8.53329	0.0019249	3.56806e-05	3.26899e-05	6.181
GOTERM_BP_DIRECT	GO:0009636~response to toxic substance	9	4.61538	8.72969e-07	NQO1, MAOB, CCL5, EPHX2, BCL2, CDK1, AHR, TYMS, CES1	194	76	19414	11.8507	0.00254844	4.63943e-05	4.25057e-05	6.059
GOTERM_BP_DIRECT	GO:0008202~steroid metabolic process	8	4.10256	9.01163e-07	SULT2B1, CYP2C9, CYP2C8, SULT1E1, NR1I2, CYP2C19, CYP3A4, CYP17A1	194	53	19414	15.1052	0.00263063	4.70375e-05	4.30949e-05	6.0452
GOTERM_BP_DIRECT	GO:0008217~regulation of blood pressure	9	4.61538	9.65965e-07	EDNRA, ACE, EDNRB, NOS3, ANPEP, HMOX1, PPARG, SOD2, PTGS2	194	77	19414	11.6967	0.00281953	4.95354e-05	4.53834e-05	6.01504
GOTERM_BP_DIRECT	GO:0048511~rhythmic process	9	4.61538	1.06728e-06	GSK3B, MAPK8, PRKDC, HNF4A, CDK1, PPARG, AHR, TP53, MTOR	194	78	19414	11.5468	0.00311481	5.37873e-05	4.9279e-05	5.97172
GOTERM_BP_DIRECT	GO:0042127~regulation of cell proliferation	12	6.15385	1.16678e-06	ALK, JUN, NOS2, PLAU, FLT3, STAT1, CDK4, ERBB2, CHEK1, KIT, EGFR, TGFBR2	194	171	19414	7.02261	0.00340468	5.78048e-05	5.29597e-05	5.93301
GOTERM_BP_DIRECT	GO:0007165~signal transduction	33	16.9231	1.29355e-06	RET, ALK, GSK3B, NR1I3, LRRK2, NR1I2, ITPR1, NR3C1, HIF1A, EGFR, TYMP, EDNRA, TTR, PLAU, ADORA3, AKT2, ANPEP, ERBB2, CXCR2, MAPK1, JAK2, STAT1, PRKCD, ANXA5, IGF1, MAPK14, ESR1, TGFBR1, CDK4, IL1B, KIT, PPARG, PTGES	194	1283	19414	2.57395	0.00377391	6.30175e-05	5.77355e-05	5.88822
GOTERM_BP_DIRECT	GO:0045944~positive regulation of transcription from RNA polymerase II promoter	32	16.4103	1.36325e-06	PRKDC, NR1I3, NR1I2, AHR, NR3C1, HIF1A, TNF, RELA, EGFR, HNF4A, JAK2, MAPK3, JUN, PARP1, STAT1, VDR, NR1H2, NME2, NR1H4, NR1H3, IGF1, MAPK14, ESR1, IL2, VEGFA, CDK9, IL6, IL1B, PPARG, PPARA, TP53, PPARD	194	1222	19414	2.62055	0.00397686	6.53244e-05	5.98491e-05	5.86542
GOTERM_BP_DIRECT	GO:0043525~positive regulation of neuron apoptotic process	8	4.10256	1.4947e-06	CDC42, NQO1, CASP3, CASP2, NR3C1, TNF, TP53, RHOA	194	57	19414	14.0452	0.00435947	7.04678e-05	6.45613e-05	5.82545
GOTERM_BP_DIRECT	GO:0071276~cellular response to cadmium ion	7	3.58974	1.60644e-06	JUN, MAPK8, HMOX1, MAPK1, MMP9, EGFR, MAPK3	194	37	19414	18.9326	0.00468462	7.45336e-05	6.82864e-05	5.79414
GOTERM_BP_DIRECT	GO:0042327~positive regulation of phosphorylation	7	3.58974	1.89196e-06	FLT1, FLT3, CCL5, KIT, MIF, EGFR, VEGFA	194	38	19414	18.4343	0.00551493	8.64092e-05	7.91665e-05	5.72309
GOTERM_BP_DIRECT	GO:0007568~aging	11	5.64103	1.92638e-06	NQO1, ACE, EDNRB, ARG1, MMP2, CAT, CASP2, TYMS, PTGS2, MPO, TGFBR2	194	145	19414	7.59168	0.00561499	8.66278e-05	7.93669e-05	5.71526
GOTERM_BP_DIRECT	GO:0007204~positive regulation of cytosolic calcium ion concentration	11	5.64103	3.13008e-06	EDNRA, EDNRB, TBXA2R, CXCR2, FFAR1, OPRM1, JAK2, ESR1, IL2, PIK3CG, CCR2	194	153	19414	7.19473	0.00910752	0.000138625	0.000127006	5.50444
GOTERM_BP_DIRECT	GO:0008283~cell proliferation	12	6.15385	3.25407e-06	CDK9, EDNRA, JUN, FPGS, ODC1, BCL2, CDK1, IGF1, CDC25C, GLUL, PTGES, PPARD	194	190	19414	6.32035	0.00946656	0.000141965	0.000130066	5.48757
GOTERM_BP_DIRECT	GO:0007566~embryo implantation	7	3.58974	4.00909e-06	IL1B, MMP2, ITGB3, PTGS2, MMP9, TGFBR2, PPARD	194	43	19414	16.2908	0.0116502	0.000167408	0.000153376	5.39695
GOTERM_BP_DIRECT	GO:0042307~positive regulation of protein import into nucleus	7	3.58974	4.00909e-06	HSP90AA1, PRKCD, CDK1, PTPN22, JAK2, MAPK14, PTGS2	194	43	19414	16.2908	0.0116502	0.000167408	0.000153376	5.39695
GOTERM_BP_DIRECT	GO:0042542~response to hydrogen peroxide	7	3.58974	4.00909e-06	STAT1, CASP3, MMP2, CAT, BCL2, HMOX1, SOD2	194	43	19414	16.2908	0.0116502	0.000167408	0.000153376	5.39695
GOTERM_BP_DIRECT	GO:0043200~response to amino acid	6	3.07692	4.16705e-06	ALAD, ARG1, CASP3, BCL2, RHOA, MTOR	194	25	19414	24.0173	0.0121064	0.00016917	0.000154991	5.38017
GOTERM_BP_DIRECT	GO:1902894~negative regulation of pri-miRNA transcription from RNA polymerase II promoter	6	3.07692	4.16705e-06	PPARG, PPARA, HIF1A, ESR1, RELA, PPARD	194	25	19414	24.0173	0.0121064	0.00016917	0.000154991	5.38017
GOTERM_BP_DIRECT	GO:0042531~positive regulation of tyrosine phosphorylation of STAT protein	8	4.10256	4.99824e-06	IL6, FLT3, CCL5, KIT, IGF1, JAK2, TNF, IL2	194	68	19414	11.7732	0.0145037	0.000200135	0.00018336	5.30118
GOTERM_BP_DIRECT	GO:0071407~cellular response to organic cyclic compound	7	3.58974	6.00913e-06	CASP8, STAT1, CCL5, IL1B, LRRK2, CDK1, TNF	194	46	19414	15.2284	0.0174114	0.00023688	0.000217025	5.22119
GOTERM_BP_DIRECT	GO:0018108~peptidyl-tyrosine phosphorylation	8	4.10256	6.07799e-06	FLT1, FLT3, INSR, ERBB2, KIT, KDR, JAK2, EGFR	194	70	19414	11.4368	0.0176091	0.00023688	0.000217025	5.21624
GOTERM_BP_DIRECT	GO:0034097~response to cytokine	7	3.58974	7.74379e-06	SELL, STAT1, BCL2, TYMS, SELE, RELA, MCL1	194	48	19414	14.5939	0.0223809	0.00029783	0.000272867	5.11105
GOTERM_BP_DIRECT	GO:0031667~response to nutrient levels	7	3.58974	8.75185e-06	CPT1A, ACE, NR1H2, EHMT2, SORD, TNF, MTOR	194	49	19414	14.296	0.0252573	0.000328525	0.000300989	5.0579
GOTERM_BP_DIRECT	GO:0010745~negative regulation of macrophage derived foam cell differentiation	5	2.5641	8.76667e-06	NR1H2, ITGB3, NR1H3, PPARG, PPARA	194	14	19414	35.7401	0.0252995	0.000328525	0.000300989	5.05717
GOTERM_BP_DIRECT	GO:0007507~heart development	12	6.15385	9.30434e-06	RBP4, CASP8, PRKDC, CASP3, MMP2, ERBB2, PPARG, SOD2, PPARA, TGFBR1, TGFBR2, PPARD	194	212	19414	5.66446	0.0268302	0.000344261	0.000315405	5.03131
GOTERM_BP_DIRECT	GO:0001938~positive regulation of endothelial cell proliferation	8	4.10256	9.65102e-06	JUN, ARG1, ITGB3, KDR, HIF1A, F3, TGFBR1, VEGFA	194	75	19414	10.6744	0.0278159	0.000352624	0.000323068	5.01543
GOTERM_BP_DIRECT	GO:0071260~cellular response to mechanical stimulus	8	4.10256	1.05415e-05	MAPK8, CASP8, IL1B, ITGB3, CHEK1, CASP2, PTGS2, MAPK3	194	76	19414	10.5339	0.0303432	0.000380407	0.000348522	4.9771
GOTERM_BP_DIRECT	GO:0008630~intrinsic apoptotic signaling pathway in response to DNA damage	7	3.58974	1.1087e-05	PRKDC, BCL2, CASP2, HMOX1, SOD2, TNF, MCL1	194	51	19414	13.7354	0.031888	0.000395211	0.000362085	4.95519
GOTERM_BP_DIRECT	GO:0006629~lipid metabolic process	12	6.15385	1.20976e-05	G6PD, NR1H2, HNF4A, AKR1A1, NR1H3, PPARG, PTPN22, COMT, CYP3A4, UGT2B7, FADS1, PPARD	194	218	19414	5.50856	0.0347436	0.000426039	0.00039033	4.9173
GOTERM_BP_DIRECT	GO:0019233~sensory perception of pain	7	3.58974	1.24303e-05	ACE, EDNRB, OPRM1, PTGS2, PTGES, CCR2, MAPK3	194	52	19414	13.4713	0.0356817	0.000432543	0.000396288	4.90552
GOTERM_BP_DIRECT	GO:0008210~estrogen metabolic process	6	3.07692	1.26965e-05	SULT1A1, CYP2C9, CYP2C8, SULT1E1, CYP3A4, UGT2B7	194	31	19414	19.3688	0.0364318	0.000436609	0.000400014	4.89632
GOTERM_BP_DIRECT	GO:0050729~positive regulation of inflammatory response	9	4.61538	1.33035e-05	ABCC1, ACE, FABP4, IL1B, JAK2, TNF, S100A9, IL2, CCR2	194	109	19414	8.26284	0.0381401	0.000452166	0.000414266	4.87603
GOTERM_BP_DIRECT	GO:0008285~negative regulation of cell proliferation	17	8.71795	1.41017e-05	BCHE, JUN, NOS3, VDR, PLG, OPRM1, PTGS2, SOD2, SULT2B1, IL6, IL1B, HNF4A, ADORA3, NOX4, JAK2, TP53, PTGES	194	457	19414	3.7226	0.0403816	0.000468518	0.000429248	4.85073
GOTERM_BP_DIRECT	GO:0007275~multicellular organism development	10	5.12821	1.41052e-05	RET, ALK, FLT1, FLT3, VDR, INSR, ERBB2, KIT, KDR, EGFR	194	144	19414	6.94946	0.0403915	0.000468518	0.000429248	4.85062
GOTERM_BP_DIRECT	GO:0050728~negative regulation of inflammatory response	10	5.12821	1.49112e-05	ALOX5, PRKCD, NR1H4, NR1H3, PPARG, AHR, PPARA, ADA, IL2, PPARD	194	145	19414	6.90153	0.0426497	0.000489725	0.000448677	4.82649
GOTERM_BP_DIRECT	GO:0042572~retinol metabolic process	7	3.58974	1.55115e-05	CYP2C8, RBP4, TTR, ADH1C, ADH1B, ADH1A, CYP3A4	194	54	19414	12.9723	0.0443279	0.000503778	0.000461553	4.80935
GOTERM_BP_DIRECT	GO:0048146~positive regulation of fibroblast proliferation	7	3.58974	1.7268e-05	JUN, CDK4, ITGB3, IGF1, MIF, ESR1, EGFR	194	55	19414	12.7365	0.0492221	0.000554663	0.000508172	4.76276
GOTERM_BP_DIRECT	GO:0035924~cellular response to vascular endothelial growth factor stimulus	6	3.07692	2.02956e-05	ERN1, FLT1, KDR, MAPK14, RELA, VEGFA	194	34	19414	17.6598	0.0575993	0.00063998	0.000586338	4.6926
GOTERM_BP_DIRECT	GO:0008631~intrinsic apoptotic signaling pathway in response to oxidative stress	5	2.5641	2.0362e-05	PRKCD, BCL2, JAK2, SOD2, MAP3K5	194	17	19414	29.433	0.0577822	0.00063998	0.000586338	4.69118
GOTERM_BP_DIRECT	GO:0009612~response to mechanical stimulus	7	3.58974	2.12623e-05	MAPK8, STAT1, MMP2, PPARG, MPO, RHOA, TGFBR2	194	57	19414	12.2896	0.0602584	0.000661166	0.000605749	4.67239
GOTERM_BP_DIRECT	GO:0097192~extrinsic apoptotic signaling pathway in absence of ligand	6	3.07692	2.34882e-05	GSK3B, IL1B, BCL2, CASP2, IL2, MCL1	194	35	19414	17.1552	0.0663529	0.000722694	0.00066212	4.62915
GOTERM_BP_DIRECT	GO:0042593~glucose homeostasis	9	4.61538	2.5238e-05	IL6, RBP4, ALOX5, HNF4A, INSR, PPARG, FFAR1, PYGL, HIF1A	194	119	19414	7.56848	0.071116	0.000768443	0.000704034	4.59795
GOTERM_BP_DIRECT	GO:0031100~animal organ regeneration	6	3.07692	3.10345e-05	ACE, FLT3, FPGS, CDK1, PPARG, TGFBR2	194	37	19414	16.2279	0.0867222	0.000935194	0.000856807	4.50816
GOTERM_BP_DIRECT	GO:0006959~humoral immune response	7	3.58974	3.14798e-05	ST6GAL1, IL6, ALOX5, BCL2, TNF, CCR2, LTF	194	61	19414	11.4837	0.0879104	0.000938934	0.000860235	4.50197
GOTERM_BP_DIRECT	GO:0051403~stress-activated MAPK cascade	5	2.5641	3.26484e-05	MAPK8, MAPK1, MAPK14, MAP3K5, MAPK3	194	19	19414	26.3348	0.0910205	0.000960991	0.000880443	4.48614
GOTERM_BP_DIRECT	GO:0010573~vascular endothelial growth factor production	4	2.05128	3.28769e-05	IL6, IL1B, HIF1A, TNF	194	7	19414	57.1841	0.0916275	0.000960991	0.000880443	4.48311
GOTERM_BP_DIRECT	GO:0050731~positive regulation of peptidyl-tyrosine phosphorylation	8	4.10256	3.44291e-05	IL6, ITGB3, IGF1, MIF, JAK2, TP53, MTOR, VEGFA	194	91	19414	8.79755	0.0957396	0.000996397	0.000912881	4.46307
GOTERM_BP_DIRECT	GO:0033138~positive regulation of peptidyl-serine phosphorylation	8	4.10256	3.69545e-05	IL6, HSP90AA1, BCL2, MIF, PTGS2, TNF, EGFR, VEGFA	194	92	19414	8.70193	0.10239	0.001059	0.000970236	4.43233
GOTERM_BP_DIRECT	GO:0006974~cellular response to DNA damage stimulus	13	6.66667	3.74971e-05	PARP1, PRKDC, PRKCD, MTOR, CASP3, CHEK1, BCL2, CASP2, MAPK1, MAPT, TP53, MCL1, MAPK3	194	292	19414	4.45527	0.103813	0.00106412	0.000974925	4.426
GOTERM_BP_DIRECT	GO:0042759~long-chain fatty acid biosynthetic process	5	2.5641	4.04939e-05	CYP2C9, CYP2C8, ALOX5, CYP3A4, FADS1	194	20	19414	25.018	0.111629	0.00112727	0.00103279	4.39261
GOTERM_BP_DIRECT	GO:0033189~response to vitamin A	5	2.5641	4.04939e-05	ARG1, CAT, PPARG, TYMS, PPARD	194	20	19414	25.018	0.111629	0.00112727	0.00103279	4.39261
GOTERM_BP_DIRECT	GO:0006006~glucose metabolic process	7	3.58974	4.14698e-05	G6PD, CPT1A, AKT2, SORD, MAPK14, TNF, PPARD	194	64	19414	10.9454	0.11416	0.00114355	0.0010477	4.38227
GOTERM_BP_DIRECT	GO:0043651~linoleic acid metabolic process	5	2.5641	4.96341e-05	GSTM2, ALOX5, GSTP1, GSTA1, FADS1	194	21	19414	23.8267	0.13505	0.00134334	0.00123074	4.30422
GOTERM_BP_DIRECT	GO:0006693~prostaglandin metabolic process	5	2.5641	4.96341e-05	GSTM1, GSTP1, GSTA1, CES2, PTGES	194	21	19414	23.8267	0.13505	0.00134334	0.00123074	4.30422
GOTERM_BP_DIRECT	GO:0060336~negative regulation of interferon-gamma-mediated signaling pathway	4	2.05128	5.22176e-05	ARG1, NR1H2, NR1H3, PPARG	194	8	19414	50.0361	0.141558	0.00140029	0.00128292	4.28218
GOTERM_BP_DIRECT	GO:0045861~negative regulation of proteolysis	5	2.5641	6.01936e-05	NR1H2, NR1H3, PLAT, F2, TP53	194	22	19414	22.7437	0.161341	0.00157095	0.00143927	4.22045
GOTERM_BP_DIRECT	GO:0070542~response to fatty acid	5	2.5641	6.01936e-05	ALAD, CAT, PLAT, FFAR1, PTGS2	194	22	19414	22.7437	0.161341	0.00157095	0.00143927	4.22045
GOTERM_BP_DIRECT	GO:0038083~peptidyl-tyrosine autophosphorylation	5	2.5641	6.01936e-05	ALK, INSR, KDR, EGFR, MAPK3	194	22	19414	22.7437	0.161341	0.00157095	0.00143927	4.22045
GOTERM_BP_DIRECT	GO:0030154~cell differentiation	20	10.2564	6.14822e-05	FLT1, FLT3, VDR, NR1H2, NR1I3, LRRK2, NR1I2, NR1H4, NR1H3, EGFR, TYMP, TGFBR2, VEGFA, ANPEP, HNF4A, PPARG, JAK2, PPARA, MCL1, PPARD	194	690	19414	2.90064	0.164494	0.00159038	0.00145707	4.21125
GOTERM_BP_DIRECT	GO:0007169~transmembrane receptor protein tyrosine kinase signaling pathway	9	4.61538	6.22769e-05	RET, ALK, FLT1, FLT3, INSR, ERBB2, KIT, KDR, EGFR	194	135	19414	6.67148	0.166433	0.0015968	0.00146296	4.20567
GOTERM_BP_DIRECT	GO:0007200~phospholipase C-activating G-protein coupled receptor signaling pathway	7	3.58974	6.36353e-05	EDNRB, CXCR2, HTR2C, FFAR1, OPRM1, ESR1, LTB4R	194	69	19414	10.1522	0.169736	0.00161744	0.00148187	4.1963
GOTERM_BP_DIRECT	GO:0030855~epithelial cell differentiation	8	4.10256	6.7302e-05	GSTK1, LGALS3, CPT1A, GSTA1, CDK1, PPARG, CES1, VEGFA	194	101	19414	7.92651	0.178588	0.00169589	0.00155375	4.17197
GOTERM_BP_DIRECT	GO:0001836~release of cytochrome c from mitochondria	5	2.5641	7.23013e-05	BCL2, CASP2, SOD2, TP53, MCL1	194	23	19414	21.7548	0.190505	0.0018063	0.0016549	4.14085
GOTERM_BP_DIRECT	GO:0050727~regulation of inflammatory response	8	4.10256	7.62474e-05	ALOX5, JAK2, PTGS2, SELE, ESR1, RELA, PTGES, CCR2	194	103	19414	7.7726	0.199789	0.00188874	0.00173043	4.11778
GOTERM_BP_DIRECT	GO:0010888~negative regulation of lipid storage	4	2.05128	7.77526e-05	IL6, ITGB3, PPARG, TNF	194	9	19414	44.4765	0.203302	0.00189392	0.00173518	4.10928
GOTERM_BP_DIRECT	GO:0051122~hepoxilin biosynthetic process	4	2.05128	7.77526e-05	GSTM2, GSTM1, ALOX5, GSTP1	194	9	19414	44.4765	0.203302	0.00189392	0.00173518	4.10928
GOTERM_BP_DIRECT	GO:0043407~negative regulation of MAP kinase activity	6	3.07692	8.15614e-05	PTPN1, IL1B, GSTP1, PRKCD, PPARG, HMGCR	194	45	19414	13.343	0.212123	0.00195413	0.00179034	4.08852
GOTERM_BP_DIRECT	GO:0046427~positive regulation of JAK-STAT cascade	6	3.07692	8.15614e-05	IL6, CCL5, KIT, F2, JAK2, TNF	194	45	19414	13.343	0.212123	0.00195413	0.00179034	4.08852
GOTERM_BP_DIRECT	GO:0042573~retinoic acid metabolic process	5	2.5641	8.60894e-05	CYP2C8, ADH1C, ADH1B, ADH1A, CYP3A4	194	24	19414	20.8484	0.222483	0.00204585	0.00187437	4.06505
GOTERM_BP_DIRECT	GO:1904646~cellular response to beta-amyloid	6	3.07692	9.0775e-05	GSK3B, ABCC1, ITGA4, PARP1, IGF1, TNF	194	46	19414	13.0529	0.233061	0.0021398	0.00196045	4.04203
GOTERM_BP_DIRECT	GO:0051000~positive regulation of nitric-oxide synthase activity	5	2.5641	0.000101694	DHFR, TERT, HIF1A, ESR1, TNF	194	25	19414	20.0144	0.257153	0.00234178	0.00214549	3.99271
GOTERM_BP_DIRECT	GO:0007569~cell aging	5	2.5641	0.000101694	BCL2, CDK1, NOX4, MIF, TP53	194	25	19414	20.0144	0.257153	0.00234178	0.00214549	3.99271
GOTERM_BP_DIRECT	GO:0009267~cellular response to starvation	7	3.58974	0.000101747	EHMT2, LRRK2, ALB, PPARA, GLUL, FADS1, MTOR	194	75	19414	9.34007	0.257269	0.00234178	0.00214549	3.99248
GOTERM_BP_DIRECT	GO:0014909~smooth muscle cell migration	4	2.05128	0.000110262	PLAU, ITGB3, BCL2, PLAT	194	10	19414	40.0289	0.275529	0.00251794	0.00230689	3.95757
GOTERM_BP_DIRECT	GO:0014075~response to amine	4	2.05128	0.000150501	NQO1, ARG1, CDK1, JAK2	194	11	19414	36.3899	0.355929	0.00335812	0.00307665	3.82246
GOTERM_BP_DIRECT	GO:1903799~negative regulation of production of miRNAs involved in gene silencing by miRNA	4	2.05128	0.000150501	TERT, ESR1, TNF, TP53	194	11	19414	36.3899	0.355929	0.00335812	0.00307665	3.82246
GOTERM_BP_DIRECT	GO:0032000~positive regulation of fatty acid beta-oxidation	4	2.05128	0.000150501	FABP1, CPT1A, AKT2, PPARA	194	11	19414	36.3899	0.355929	0.00335812	0.00307665	3.82246
GOTERM_BP_DIRECT	GO:0001889~liver development	7	3.58974	0.000156107	JUN, ARG1, HNF4A, FPGS, SOD2, RELA, ADA	194	81	19414	8.64821	0.3664	0.0034089	0.00312317	3.80658
GOTERM_BP_DIRECT	GO:0043524~negative regulation of neuron apoptotic process	9	4.61538	0.000156275	JUN, TERT, BCL2, KDR, HMOX1, JAK2, SOD2, HIF1A, RHOA	194	154	19414	5.84837	0.366711	0.0034089	0.00312317	3.80611
GOTERM_BP_DIRECT	GO:0019221~cytokine-mediated signaling pathway	9	4.61538	0.000156275	IL6, FLT3, STAT1, IL1B, KIT, JAK2, F3, RELA, CCR2	194	154	19414	5.84837	0.366711	0.0034089	0.00312317	3.80611
GOTERM_BP_DIRECT	GO:0009314~response to radiation	5	2.5641	0.000160807	MMP2, ITGB3, BCL2, OPRM1, TNF	194	28	19414	17.87	0.375045	0.00345616	0.00316647	3.7937
GOTERM_BP_DIRECT	GO:0010332~response to gamma radiation	5	2.5641	0.000160807	PARP1, PRKDC, BCL2, SOD2, TP53	194	28	19414	17.87	0.375045	0.00345616	0.00316647	3.7937
GOTERM_BP_DIRECT	GO:0042981~regulation of apoptotic process	11	5.64103	0.000165684	ALK, HSP90AA1, CASP8, FLT3, STAT1, NME2, CASP2, JAK2, ESR1, TP53, MCL1	194	243	19414	4.53002	0.383892	0.00353499	0.00323869	3.78072
GOTERM_BP_DIRECT	GO:0008203~cholesterol metabolic process	7	3.58974	0.000178601	SULT2B1, CYP2C9, FECH, CAT, CYP3A4, CES1, PPARD	194	83	19414	8.43982	0.406726	0.00377774	0.0034611	3.74812
GOTERM_BP_DIRECT	GO:0043491~protein kinase B signaling	6	3.07692	0.000179646	CCL5, AKT2, IL1B, KDR, IGF1, TNF	194	53	19414	11.3289	0.408535	0.00377774	0.0034611	3.74558
GOTERM_BP_DIRECT	GO:0010269~response to selenium ion	4	2.05128	0.0001992	ALAD, MAOB, ARG1, SOD2	194	12	19414	33.3574	0.441399	0.00415901	0.00381041	3.70071
GOTERM_BP_DIRECT	GO:0030225~macrophage differentiation	5	2.5641	0.000211917	CDC42, CASP8, PARP1, MMP9, VEGFA	194	30	19414	16.6787	0.461786	0.00439315	0.00402492	3.67383
GOTERM_BP_DIRECT	GO:0090398~cellular senescence	6	3.07692	0.000214307	MAPK8, PRKCD, MIF, MAPK14, TP53, MAP3K5	194	55	19414	10.917	0.465534	0.00441141	0.00404165	3.66896
GOTERM_BP_DIRECT	GO:0032024~positive regulation of insulin secretion	6	3.07692	0.000233437	RBP4, ITPR1, FFAR1, F2, JAK2, GLUL	194	56	19414	10.722	0.494606	0.00477159	0.00437164	3.63183
GOTERM_BP_DIRECT	GO:0043124~negative regulation of I-kappaB kinase/NF-kappaB signaling	6	3.07692	0.000253839	CASP8, STAT1, GSTP1, NR1H4, ESR1, RHOA	194	57	19414	10.5339	0.52387	0.00507706	0.00465152	3.59544
GOTERM_BP_DIRECT	GO:0002523~leukocyte migration involved in inflammatory response	4	2.05128	0.000257067	ALOX5, SELE, TNF, S100A9	194	13	19414	30.7914	0.528343	0.00507706	0.00465152	3.58995
GOTERM_BP_DIRECT	GO:0019430~removal of superoxide radicals	4	2.05128	0.000257067	NQO1, NOS3, SOD2, MPO	194	13	19414	30.7914	0.528343	0.00507706	0.00465152	3.58995
GOTERM_BP_DIRECT	GO:1904996~positive regulation of leukocyte adhesion to vascular endothelial cell	4	2.05128	0.000257067	IL6, TNF, RELA, RHOA	194	13	19414	30.7914	0.528343	0.00507706	0.00465152	3.58995
GOTERM_BP_DIRECT	GO:0051918~negative regulation of fibrinolysis	4	2.05128	0.000257067	PLAU, PLG, PLAT, F2	194	13	19414	30.7914	0.528343	0.00507706	0.00465152	3.58995
GOTERM_BP_DIRECT	GO:0007584~response to nutrient	6	3.07692	0.000275567	NQO1, TBXA2R, STAT1, PPARG, MTOR, TGFBR2	194	58	19414	10.3523	0.553177	0.00540592	0.0049528	3.55977
GOTERM_BP_DIRECT	GO:0006157~deoxyadenosine catabolic process	3	1.53846	0.000293031	PNP, XDH, ADA	194	3	19414	100.072	0.57542	0.00567239	0.00519694	3.53309
GOTERM_BP_DIRECT	GO:0031281~positive regulation of cyclase activity	3	1.53846	0.000293031	MAPK8, MAPK14, MAPK3	194	3	19414	100.072	0.57542	0.00567239	0.00519694	3.53309
GOTERM_BP_DIRECT	GO:0043627~response to estrogen	6	3.07692	0.000298678	HSP90AA1, MMP2, HMOX1, PPARG, ESR1, TGFBR2	194	59	19414	10.1768	0.582372	0.00574365	0.00526223	3.5248
GOTERM_BP_DIRECT	GO:0097421~liver regeneration	5	2.5641	0.000309146	IL6, CPT1A, HMOX1, TYMS, TNF	194	33	19414	15.1624	0.594961	0.00586775	0.00537593	3.50984
GOTERM_BP_DIRECT	GO:2000379~positive regulation of reactive oxygen species metabolic process	5	2.5641	0.000309146	F2, MAPK14, TP53, XDH, TGFBR2	194	33	19414	15.1624	0.594961	0.00586775	0.00537593	3.50984
GOTERM_BP_DIRECT	GO:0019722~calcium-mediated signaling	7	3.58974	0.000313413	EDNRB, LRRK2, CXCR2, SELE, TNF, ADA, CCR2	194	92	19414	7.61419	0.599984	0.00591037	0.00541497	3.50388
GOTERM_BP_DIRECT	GO:0006508~proteolysis	14	7.17949	0.00032172	ACE, MMP2, PLAT, PLG, F2, F3, MMP9, CASP8, F9, PLAU, ANPEP, CASP3, LAP3, LTF	194	422	19414	3.31993	0.609583	0.00602813	0.00552286	3.49252
GOTERM_BP_DIRECT	GO:0000122~negative regulation of transcription from RNA polymerase II promoter	23	11.7949	0.000344929	JUN, DNMT1, PARP1, STAT1, VDR, EHMT2, NR1H2, NR1I3, NR1I2, NR1H4, NR1H3, NR3C1, ESR1, TNF, RELA, VEGFA, EDNRB, MDM2, DNMT3B, PPARG, PPARA, TP53, PPARD	194	988	19414	2.32962	0.635199	0.00642183	0.00588357	3.46227
GOTERM_BP_DIRECT	GO:0048246~macrophage chemotaxis	4	2.05128	0.000403015	LGALS3, EDNRB, CCL5, MMP2	194	15	19414	26.6859	0.692184	0.00745579	0.00683086	3.39468
GOTERM_BP_DIRECT	GO:0070059~intrinsic apoptotic signaling pathway in response to endoplasmic reticulum stress	5	2.5641	0.000434792	ERN1, BCL2, ITPR1, TP53, MAP3K5	194	36	19414	13.8989	0.719497	0.0079431	0.00727732	3.36172
GOTERM_BP_DIRECT	GO:0034612~response to tumor necrosis factor	5	2.5641	0.000434792	CASP8, CASP3, JAK2, PTGS2, SELE	194	36	19414	13.8989	0.719497	0.0079431	0.00727732	3.36172
GOTERM_BP_DIRECT	GO:0071356~cellular response to tumor necrosis factor	8	4.10256	0.000445972	FABP4, CCL5, LRRK2, MAPK1, MAPK14, RELA, MAP3K5, MAPK3	194	137	19414	5.84363	0.72852	0.00809674	0.00741809	3.35069
GOTERM_BP_DIRECT	GO:0032757~positive regulation of interleukin-8 production	6	3.07692	0.00046965	IL6, NOS2, IL1B, TNF, F3, RELA	194	65	19414	9.23743	0.746682	0.00847399	0.00776372	3.32823
GOTERM_BP_DIRECT	GO:0046326~positive regulation of glucose import	5	2.5641	0.000483732	TERT, AKT2, INSR, IGF1, MAPK14	194	37	19414	13.5233	0.756902	0.00856938	0.00785111	3.3154
GOTERM_BP_DIRECT	GO:2001237~negative regulation of extrinsic apoptotic signaling pathway	5	2.5641	0.000483732	LGALS3, GSTP1, IGF1, RELA, TGFBR1	194	37	19414	13.5233	0.756902	0.00856938	0.00785111	3.3154
GOTERM_BP_DIRECT	GO:2001240~negative regulation of extrinsic apoptotic signaling pathway in absence of ligand	5	2.5641	0.000483732	TERT, IL1B, BCL2, TNF, MCL1	194	37	19414	13.5233	0.756902	0.00856938	0.00785111	3.3154
GOTERM_BP_DIRECT	GO:0038084~vascular endothelial growth factor signaling pathway	4	2.05128	0.000492398	FLT1, FLT3, KDR, VEGFA	194	16	19414	25.018	0.762985	0.00867035	0.00794362	3.30768
GOTERM_BP_DIRECT	GO:0032869~cellular response to insulin stimulus	7	3.58974	0.000517467	PARP1, STAT1, PRKDC, CDK4, AKT2, INSR, PPARG	194	101	19414	6.93569	0.77974	0.00905723	0.00829807	3.28612
GOTERM_BP_DIRECT	GO:0006695~cholesterol biosynthetic process	5	2.5641	0.000536471	G6PD, HMGCR, CFTR, CES1, FDFT1	194	38	19414	13.1674	0.791648	0.00918372	0.00841395	3.27045
GOTERM_BP_DIRECT	GO:0032147~activation of protein kinase activity	5	2.5641	0.000536471	ITGB3, INSR, PRKCD, TGFBR2, VEGFA	194	38	19414	13.1674	0.791648	0.00918372	0.00841395	3.27045
GOTERM_BP_DIRECT	GO:1901216~positive regulation of neuron death	5	2.5641	0.000536471	GSK3B, CASP8, PARP1, MAPT, MAP3K5	194	38	19414	13.1674	0.791648	0.00918372	0.00841395	3.27045
GOTERM_BP_DIRECT	GO:0008286~insulin receptor signaling pathway	6	3.07692	0.000540403	GSK3B, PTPN1, AKT2, INSR, MAPK1, MAPK3	194	67	19414	8.96169	0.79403	0.00918372	0.00841395	3.26728
GOTERM_BP_DIRECT	GO:0071466~cellular response to xenobiotic stimulus	6	3.07692	0.000540403	NOS2, HSPA5, IL1B, EHMT2, ITGB3, TP53	194	67	19414	8.96169	0.79403	0.00918372	0.00841395	3.26728
GOTERM_BP_DIRECT	GO:0009749~response to glucose	6	3.07692	0.000578643	HNF4A, CASP3, GLUL, RHOA, TGFBR2, PPARD	194	68	19414	8.8299	0.815824	0.00963856	0.00883068	3.23759
GOTERM_BP_DIRECT	GO:0046059~dAMP catabolic process	3	1.53846	0.000582221	PNP, XDH, ADA	194	4	19414	75.0541	0.817741	0.00963856	0.00883068	3.23491
GOTERM_BP_DIRECT	GO:0032369~negative regulation of lipid transport	3	1.53846	0.000582221	NR1H2, ITGB3, NR1H3	194	4	19414	75.0541	0.817741	0.00963856	0.00883068	3.23491
GOTERM_BP_DIRECT	GO:0001937~negative regulation of endothelial cell proliferation	5	2.5641	0.000593172	STAT1, ALOX5, TNF, XDH, TGFBR1	194	39	19414	12.8298	0.823486	0.00963856	0.00883068	3.22682
GOTERM_BP_DIRECT	GO:0002407~dendritic cell chemotaxis	4	2.05128	0.000593548	CCL5, CXCR2, PIK3CG, CCR2	194	17	19414	23.5464	0.82368	0.00963856	0.00883068	3.22654
GOTERM_BP_DIRECT	GO:0031103~axon regeneration	4	2.05128	0.000593548	DHFR, JUN, BCL2, JAK2	194	17	19414	23.5464	0.82368	0.00963856	0.00883068	3.22654
GOTERM_BP_DIRECT	GO:0032270~positive regulation of cellular protein metabolic process	4	2.05128	0.000593548	NR1H2, MAPK1, NR1H3, MAPK3	194	17	19414	23.5464	0.82368	0.00963856	0.00883068	3.22654
GOTERM_BP_DIRECT	GO:0045987~positive regulation of smooth muscle contraction	4	2.05128	0.000593548	TBXA2R, TACR2, PTGS2, ADA	194	17	19414	23.5464	0.82368	0.00963856	0.00883068	3.22654
GOTERM_BP_DIRECT	GO:0042632~cholesterol homeostasis	7	3.58974	0.000604546	FABP4, NR1H2, HNF4A, EPHX2, NR1H4, NR1H3, CES1	194	104	19414	6.73563	0.829262	0.00976292	0.00894461	3.21857
GOTERM_BP_DIRECT	GO:0001974~blood vessel remodeling	5	2.5641	0.000653999	EDNRA, ACE, NOS3, MDM2, CCR2	194	40	19414	12.509	0.852254	0.0104461	0.00957054	3.18442
GOTERM_BP_DIRECT	GO:0035094~response to nicotine	5	2.5641	0.000653999	CASP3, MMP2, BCL2, HMOX1, MAPK1	194	40	19414	12.509	0.852254	0.0104461	0.00957054	3.18442
GOTERM_BP_DIRECT	GO:0035234~ectopic germ cell programmed cell death	4	2.05128	0.000707062	PRKDC, IL1B, KIT, CASP2	194	18	19414	22.2383	0.873495	0.0111288	0.010196	3.15054
GOTERM_BP_DIRECT	GO:0051770~positive regulation of nitric-oxide synthase biosynthetic process	4	2.05128	0.000707062	STAT1, LRRK2, KDR, JAK2	194	18	19414	22.2383	0.873495	0.0111288	0.010196	3.15054
GOTERM_BP_DIRECT	GO:0035556~intracellular signal transduction	14	7.17949	0.000708159	GSK3B, LRRK2, PRKCD, MAPK14, TGFBR1, MAPK8, AKT2, KIT, ERBB2, CHEK1, HMOX1, MAPK1, JAK2, MAPK3	194	459	19414	3.05231	0.8739	0.0111288	0.010196	3.14987
GOTERM_BP_DIRECT	GO:0001541~ovarian follicle development	5	2.5641	0.000719116	MMP2, KIT, BCL2, KDR, VEGFA	194	41	19414	12.2039	0.877878	0.0112405	0.0102984	3.1432
GOTERM_BP_DIRECT	GO:0050679~positive regulation of epithelial cell proliferation	6	3.07692	0.000752215	ERBB2, NME2, IGF1, GLUL, EGFR, VEGFA	194	72	19414	8.33935	0.889147	0.0116953	0.0107151	3.12366
GOTERM_BP_DIRECT	GO:2000406~positive regulation of T cell migration	4	2.05128	0.000833515	ITGA4, CCL5, ITGB3, RHOA	194	19	19414	21.0678	0.912611	0.0127558	0.0116867	3.07909
GOTERM_BP_DIRECT	GO:0042730~fibrinolysis	4	2.05128	0.000833515	PLAU, PLG, PLAT, F2	194	19	19414	21.0678	0.912611	0.0127558	0.0116867	3.07909
GOTERM_BP_DIRECT	GO:0035162~embryonic hemopoiesis	4	2.05128	0.000833515	KIT, KDR, HIF1A, TGFBR2	194	19	19414	21.0678	0.912611	0.0127558	0.0116867	3.07909
GOTERM_BP_DIRECT	GO:0045454~cell redox homeostasis	5	2.5641	0.000862882	NQO1, PRDX5, NOS2, NOS3, GSR	194	43	19414	11.6363	0.919805	0.0130684	0.011973	3.06405
GOTERM_BP_DIRECT	GO:0009409~response to cold	5	2.5641	0.000862882	HSP90AA1, CASP8, ADRB3, PPARG, SOD2	194	43	19414	11.6363	0.919805	0.0130684	0.011973	3.06405
GOTERM_BP_DIRECT	GO:0032091~negative regulation of protein binding	6	3.07692	0.000962	GSK3B, MAPK8, ACE, LRRK2, PRKCD, PPARA	194	76	19414	7.90043	0.939992	0.0142986	0.0131001	3.01683
GOTERM_BP_DIRECT	GO:0002326~B cell lineage commitment	3	1.53846	0.000964014	PRKDC, BCL2, TP53	194	5	19414	60.0433	0.940345	0.0142986	0.0131001	3.01592
GOTERM_BP_DIRECT	GO:0031622~positive regulation of fever generation	3	1.53846	0.000964014	IL1B, PTGS2, TNF	194	5	19414	60.0433	0.940345	0.0142986	0.0131001	3.01592
GOTERM_BP_DIRECT	GO:0045923~positive regulation of fatty acid metabolic process	3	1.53846	0.000964014	PPARG, PPARA, PPARD	194	5	19414	60.0433	0.940345	0.0142986	0.0131001	3.01592
GOTERM_BP_DIRECT	GO:0060391~positive regulation of SMAD protein import into nucleus	4	2.05128	0.00097346	PARP1, PPARG, JAK2, TGFBR1	194	20	19414	20.0144	0.941971	0.0142986	0.0131001	3.01168
GOTERM_BP_DIRECT	GO:0050901~leukocyte tethering or rolling	4	2.05128	0.00097346	SELL, ITGA4, SELE, TNF	194	20	19414	20.0144	0.941971	0.0142986	0.0131001	3.01168
GOTERM_BP_DIRECT	GO:0000165~MAPK cascade	8	4.10256	0.000999684	RET, CCL5, IL1B, LRRK2, TNF, EGFR, MAP3K5, MAPK3	194	157	19414	5.09922	0.946257	0.0146104	0.0133858	3.00014
GOTERM_BP_DIRECT	GO:0002548~monocyte chemotaxis	5	2.5641	0.00102579	LGALS3, IL6, FLT1, CCL5, CCR2	194	45	19414	11.1191	0.95021	0.0148435	0.0135994	2.98894
GOTERM_BP_DIRECT	GO:0009755~hormone-mediated signaling pathway	5	2.5641	0.00102579	NR1H2, NR1H3, PPARG, PPARA, PPARD	194	45	19414	11.1191	0.95021	0.0148435	0.0135994	2.98894
GOTERM_BP_DIRECT	GO:0042177~negative regulation of protein catabolic process	5	2.5641	0.00111484	NQO1, NOS2, HMGCR, RELA, EGFR	194	46	19414	10.8774	0.961631	0.015974	0.014635	2.95279
GOTERM_BP_DIRECT	GO:0034198~cellular response to amino acid starvation	5	2.5641	0.00111484	MAPK8, MAPK1, MTOR, MAP3K5, MAPK3	194	46	19414	10.8774	0.961631	0.015974	0.014635	2.95279
GOTERM_BP_DIRECT	GO:0032729~positive regulation of interferon-gamma production	6	3.07692	0.00114577	IL1B, PTPN22, JAK2, TNF, IL2, CCR2	194	79	19414	7.60042	0.964951	0.016337	0.0149676	2.9409
GOTERM_BP_DIRECT	GO:0051091~positive regulation of sequence-specific DNA binding transcription factor activity	7	3.58974	0.00117099	IL6, IL1B, KIT, PPARG, JAK2, ESR1, TNF	194	118	19414	5.93648	0.967445	0.0166156	0.0152229	2.93145
GOTERM_BP_DIRECT	GO:0014911~positive regulation of smooth muscle cell migration	4	2.05128	0.00129594	CCL5, ITGB3, BCL2, IGF1	194	22	19414	18.1949	0.977416	0.0182997	0.0167659	2.88741
GOTERM_BP_DIRECT	GO:0021762~substantia nigra development	5	2.5641	0.00130896	CDC42, G6PD, MAOB, HSPA5, RHOA	194	48	19414	10.4242	0.97826	0.0183946	0.0168528	2.88307
GOTERM_BP_DIRECT	GO:0030593~neutrophil chemotaxis	6	3.07692	0.00135433	LGALS3, CCL5, IL1B, CXCR2, S100A9, PIK3CG	194	82	19414	7.32235	0.980963	0.0189411	0.0173535	2.86828
GOTERM_BP_DIRECT	GO:0043536~positive regulation of blood vessel endothelial cell migration	5	2.5641	0.00141435	NOS3, KDR, PLG, HIF1A, VEGFA	194	49	19414	10.2114	0.98403	0.0196218	0.0179771	2.84944
GOTERM_BP_DIRECT	GO:0016098~monoterpenoid metabolic process	3	1.53846	0.00143656	CYP2C9, CYP2C19, CYP3A4	194	6	19414	50.0361	0.985036	0.0196218	0.0179771	2.84268
GOTERM_BP_DIRECT	GO:0061419~positive regulation of transcription from RNA polymerase II promoter in response to hypoxia	3	1.53846	0.00143656	HIF1A, TP53, VEGFA	194	6	19414	50.0361	0.985036	0.0196218	0.0179771	2.84268
GOTERM_BP_DIRECT	GO:1990962~drug transport across blood-brain barrier	3	1.53846	0.00143656	ABCC1, ABCB1, ABCG2	194	6	19414	50.0361	0.985036	0.0196218	0.0179771	2.84268
GOTERM_BP_DIRECT	GO:0032025~response to cobalt ion	3	1.53846	0.00143656	ALAD, CASP8, CASP3	194	6	19414	50.0361	0.985036	0.0196218	0.0179771	2.84268
GOTERM_BP_DIRECT	GO:0006935~chemotaxis	7	3.58974	0.00144978	PLAU, CCL5, CXCR2, MAPK1, MAPK14, TYMP, CCR2	194	123	19414	5.69516	0.985604	0.0197103	0.0180582	2.8387
GOTERM_BP_DIRECT	GO:2000378~negative regulation of reactive oxygen species metabolic process	4	2.05128	0.00147949	G6PD, BCL2, HIF1A, TP53	194	23	19414	17.4039	0.986803	0.020021	0.0183429	2.82989
GOTERM_BP_DIRECT	GO:0045821~positive regulation of glycolytic process	4	2.05128	0.00167855	INSR, IGF1, HIF1A, MTOR	194	24	19414	16.6787	0.992631	0.0226101	0.020715	2.77507
GOTERM_BP_DIRECT	GO:0071353~cellular response to interleukin-4	4	2.05128	0.00189357	ALAD, HSPA5, CDK4, ARG1	194	25	19414	16.0115	0.996074	0.0253895	0.0232614	2.72272
GOTERM_BP_DIRECT	GO:0046321~positive regulation of fatty acid oxidation	3	1.53846	0.00199803	PPARG, PPARA, PPARD	194	7	19414	42.8881	0.997109	0.0258418	0.0236758	2.6994
GOTERM_BP_DIRECT	GO:0033129~positive regulation of histone phosphorylation	3	1.53846	0.00199803	CDK9, IL1B, MAPK3	194	7	19414	42.8881	0.997109	0.0258418	0.0236758	2.6994
GOTERM_BP_DIRECT	GO:0001554~luteolysis	3	1.53846	0.00199803	HSPA5, CASP3, CASP2	194	7	19414	42.8881	0.997109	0.0258418	0.0236758	2.6994
GOTERM_BP_DIRECT	GO:0051239~regulation of multicellular organismal process	3	1.53846	0.00199803	ITPR1, TGFBR1, TGFBR2	194	7	19414	42.8881	0.997109	0.0258418	0.0236758	2.6994
GOTERM_BP_DIRECT	GO:0006527~arginine catabolic process	3	1.53846	0.00199803	NOS2, NOS3, ARG1	194	7	19414	42.8881	0.997109	0.0258418	0.0236758	2.6994
GOTERM_BP_DIRECT	GO:0060440~trachea formation	3	1.53846	0.00199803	MAPK1, TGFBR2, MAPK3	194	7	19414	42.8881	0.997109	0.0258418	0.0236758	2.6994
GOTERM_BP_DIRECT	GO:0090594~inflammatory response to wounding	3	1.53846	0.00199803	IL6, TNF, CCR2	194	7	19414	42.8881	0.997109	0.0258418	0.0236758	2.6994
GOTERM_BP_DIRECT	GO:1903573~negative regulation of response to endoplasmic reticulum stress	3	1.53846	0.00199803	NR1H2, ALOX5, NR1H3	194	7	19414	42.8881	0.997109	0.0258418	0.0236758	2.6994
GOTERM_BP_DIRECT	GO:0010718~positive regulation of epithelial to mesenchymal transition	5	2.5641	0.00203126	IL6, IL1B, TGFBR1, MTOR, TGFBR2	194	54	19414	9.26594	0.997377	0.0261558	0.0239635	2.69223
GOTERM_BP_DIRECT	GO:0098586~cellular response to virus	6	3.07692	0.00204671	IL6, HSP90AA1, CCL5, JAK2, MAPK14, HIF1A	194	90	19414	6.67148	0.997493	0.0262392	0.0240399	2.68894
GOTERM_BP_DIRECT	GO:0046697~decidualization	4	2.05128	0.002125	PARP1, VDR, PTGS2, PPARD	194	26	19414	15.3957	0.998007	0.027006	0.0247424	2.67264
GOTERM_BP_DIRECT	GO:0032740~positive regulation of interleukin-17 production	4	2.05128	0.002125	IL6, NR1H4, JAK2, IL2	194	26	19414	15.3957	0.998007	0.027006	0.0247424	2.67264
GOTERM_BP_DIRECT	GO:0032355~response to estradiol	6	3.07692	0.00214853	NQO1, CASP8, CASP3, CAT, PTGS2, ESR1	194	91	19414	6.59816	0.99814	0.0271869	0.0249081	2.66786
GOTERM_BP_DIRECT	GO:0070371~ERK1 and ERK2 cascade	5	2.5641	0.00217376	CDK1, KDR, MAPK1, IGF1, MAPK3	194	55	19414	9.09747	0.998272	0.0273876	0.025092	2.66279
GOTERM_BP_DIRECT	GO:0045892~negative regulation of transcription, DNA-templated	15	7.69231	0.00231256	JUN, PARP1, VDR, NR1H2, NR1I2, AHR, NR3C1, TNF, RELA, FABP4, HNF4A, MDM2, PPARG, TP53, PPARD	194	588	19414	2.55286	0.998849	0.0290112	0.0265795	2.63591
GOTERM_BP_DIRECT	GO:0010875~positive regulation of cholesterol efflux	4	2.05128	0.00237327	NR1H2, NR1H3, PPARG, CES1	194	27	19414	14.8255	0.999037	0.0296455	0.0271607	2.62465
GOTERM_BP_DIRECT	GO:0070372~regulation of ERK1 and ERK2 cascade	4	2.05128	0.00263876	IL1B, GSTP1, ERBB2, EGFR	194	28	19414	14.296	0.999558	0.0321	0.0294095	2.5786
GOTERM_BP_DIRECT	GO:0010971~positive regulation of G2/M transition of mitotic cell cycle	4	2.05128	0.00263876	CDK4, CDK1, CDC25C, CDC25B	194	28	19414	14.296	0.999558	0.0321	0.0294095	2.5786
GOTERM_BP_DIRECT	GO:0071363~cellular response to growth factor stimulus	5	2.5641	0.00264242	INSR, ERBB2, CAT, TGFBR1, TGFBR2	194	58	19414	8.62691	0.999562	0.0321	0.0294095	2.578
GOTERM_BP_DIRECT	GO:0000086~G2/M transition of mitotic cell cycle	5	2.5641	0.00264242	ABCB1, CHEK1, CDK1, CDC25C, CDC25B	194	58	19414	8.62691	0.999562	0.0321	0.0294095	2.578
GOTERM_BP_DIRECT	GO:0000255~allantoin metabolic process	3	1.53846	0.00264663	PNP, XDH, ADA	194	8	19414	37.5271	0.999568	0.0321	0.0294095	2.57731
GOTERM_BP_DIRECT	GO:0043279~response to alkaloid	3	1.53846	0.00264663	NQO1, BCHE, CPT1A	194	8	19414	37.5271	0.999568	0.0321	0.0294095	2.57731
GOTERM_BP_DIRECT	GO:0042135~neurotransmitter catabolic process	3	1.53846	0.00264663	MAOB, MAOA, COMT	194	8	19414	37.5271	0.999568	0.0321	0.0294095	2.57731
GOTERM_BP_DIRECT	GO:0071230~cellular response to amino acid stimulus	5	2.5641	0.00281287	DNMT1, MMP2, TNF, EGFR, MTOR	194	59	19414	8.48069	0.999734	0.0339753	0.0311275	2.55085
GOTERM_BP_DIRECT	GO:0042755~eating behavior	4	2.05128	0.00292188	CPT1A, ACE, ADRB3, OPRM1	194	29	19414	13.8031	0.999807	0.0347181	0.0318081	2.53434
GOTERM_BP_DIRECT	GO:0051602~response to electrical stimulus	4	2.05128	0.00292188	NQO1, MMP2, TACR2, SOD2	194	29	19414	13.8031	0.999807	0.0347181	0.0318081	2.53434
GOTERM_BP_DIRECT	GO:0001774~microglial cell activation	4	2.05128	0.00292188	JUN, MAPT, JAK2, TNF	194	29	19414	13.8031	0.999807	0.0347181	0.0318081	2.53434
GOTERM_BP_DIRECT	GO:0071549~cellular response to dexamethasone stimulus	4	2.05128	0.00292188	ARG1, PLAT, JAK2, NR3C1	194	29	19414	13.8031	0.999807	0.0347181	0.0318081	2.53434
GOTERM_BP_DIRECT	GO:0007254~JNK cascade	5	2.5641	0.0029907	MAPK8, IL1B, LRRK2, TNF, MAP3K5	194	60	19414	8.33935	0.999842	0.035392	0.0324255	2.52423
GOTERM_BP_DIRECT	GO:0045840~positive regulation of mitotic nuclear division	4	2.05128	0.00322298	IL1B, INSR, IGF1, TNF	194	30	19414	13.343	0.99992	0.037533	0.034387	2.49174
GOTERM_BP_DIRECT	GO:0048010~vascular endothelial growth factor receptor signaling pathway	4	2.05128	0.00322298	FLT1, KDR, MAPK14, VEGFA	194	30	19414	13.343	0.99992	0.037533	0.034387	2.49174
GOTERM_BP_DIRECT	GO:0010575~positive regulation of vascular endothelial growth factor production	4	2.05128	0.00322298	IL6, IL1B, PTGS2, HIF1A	194	30	19414	13.343	0.99992	0.037533	0.034387	2.49174
GOTERM_BP_DIRECT	GO:0035774~positive regulation of insulin secretion involved in cellular response to glucose stimulus	4	2.05128	0.00322298	NR1H4, HIF1A, CFTR, PPARD	194	30	19414	13.343	0.99992	0.037533	0.034387	2.49174
GOTERM_BP_DIRECT	GO:0014070~response to organic cyclic compound	5	2.5641	0.00336911	G6PD, CPT1A, EDNRB, CDK1, PPARA	194	62	19414	8.07034	0.999948	0.0385996	0.0353642	2.47248
GOTERM_BP_DIRECT	GO:0010042~response to manganese ion	3	1.53846	0.0033806	ARG1, SOD2, PTGS2	194	9	19414	33.3574	0.99995	0.0385996	0.0353642	2.47101
GOTERM_BP_DIRECT	GO:0046456~icosanoid biosynthetic process	3	1.53846	0.0033806	CYP2C9, CYP2C8, FADS1	194	9	19414	33.3574	0.99995	0.0385996	0.0353642	2.47101
GOTERM_BP_DIRECT	GO:0031401~positive regulation of protein modification process	3	1.53846	0.0033806	FLT1, FLT3, KIT	194	9	19414	33.3574	0.99995	0.0385996	0.0353642	2.47101
GOTERM_BP_DIRECT	GO:0006069~ethanol oxidation	3	1.53846	0.0033806	ADH1C, ADH1B, ADH1A	194	9	19414	33.3574	0.99995	0.0385996	0.0353642	2.47101
GOTERM_BP_DIRECT	GO:0007249~I-kappaB kinase/NF-kappaB signaling	5	2.5641	0.00377886	EDNRA, EDNRB, IL1B, TNF, RELA	194	64	19414	7.81814	0.999984	0.042979	0.0393766	2.42264
GOTERM_BP_DIRECT	GO:0043123~positive regulation of I-kappaB kinase/NF-kappaB signaling	8	4.10256	0.00382575	CASP8, PARP1, IL1B, HMOX1, TNF, RELA, RHOA, LTF	194	199	19414	4.023	0.999986	0.0432935	0.0396648	2.41728
GOTERM_BP_DIRECT	GO:0043552~positive regulation of phosphatidylinositol 3-kinase activity	4	2.05128	0.00388057	CDC42, FLT1, FLT3, KIT	194	32	19414	12.509	0.999988	0.0432935	0.0396648	2.4111
GOTERM_BP_DIRECT	GO:0001569~branching involved in blood vessel morphogenesis	4	2.05128	0.00388057	EDNRA, KDR, TGFBR2, VEGFA	194	32	19414	12.509	0.999988	0.0432935	0.0396648	2.4111
GOTERM_BP_DIRECT	GO:1900745~positive regulation of p38MAPK cascade	4	2.05128	0.00388057	IL1B, XDH, MAP3K5, VEGFA	194	32	19414	12.509	0.999988	0.0432935	0.0396648	2.4111
GOTERM_BP_DIRECT	GO:0007159~leukocyte cell-cell adhesion	4	2.05128	0.00388057	SELL, ITGA4, CCL5, SELE	194	32	19414	12.509	0.999988	0.0432935	0.0396648	2.4111
GOTERM_BP_DIRECT	GO:0099105~ion channel modulating, G-protein coupled receptor signaling pathway	3	1.53846	0.00419819	ITPR1, FFAR1, F2	194	10	19414	30.0216	0.999995	0.0454492	0.0416398	2.37694
GOTERM_BP_DIRECT	GO:0010863~positive regulation of phospholipase C activity	3	1.53846	0.00419819	FLT1, KIT, ESR1	194	10	19414	30.0216	0.999995	0.0454492	0.0416398	2.37694
GOTERM_BP_DIRECT	GO:2000272~negative regulation of receptor activity	3	1.53846	0.00419819	PPARG, PPARA, TNF	194	10	19414	30.0216	0.999995	0.0454492	0.0416398	2.37694
GOTERM_BP_DIRECT	GO:0032872~regulation of stress-activated MAPK cascade	3	1.53846	0.00419819	GSTP1, MAPK1, MAPK3	194	10	19414	30.0216	0.999995	0.0454492	0.0416398	2.37694
GOTERM_BP_DIRECT	GO:0033197~response to vitamin E	3	1.53846	0.00419819	ALAD, ARG1, CAT	194	10	19414	30.0216	0.999995	0.0454492	0.0416398	2.37694
GOTERM_BP_DIRECT	GO:0070633~transepithelial transport	3	1.53846	0.00419819	ABCC1, ABCB1, ABCG2	194	10	19414	30.0216	0.999995	0.0454492	0.0416398	2.37694
GOTERM_BP_DIRECT	GO:0046638~positive regulation of alpha-beta T cell differentiation	3	1.53846	0.00419819	PNP, RHOA, ADA	194	10	19414	30.0216	0.999995	0.0454492	0.0416398	2.37694
GOTERM_BP_DIRECT	GO:0042420~dopamine catabolic process	3	1.53846	0.00419819	MAOB, MAOA, COMT	194	10	19414	30.0216	0.999995	0.0454492	0.0416398	2.37694
GOTERM_BP_DIRECT	GO:0048662~negative regulation of smooth muscle cell proliferation	4	2.05128	0.00423771	NOS3, HMOX1, PPARG, PPARD	194	33	19414	12.13	0.999996	0.0455398	0.0417228	2.37287
GOTERM_BP_DIRECT	GO:0043388~positive regulation of DNA binding	4	2.05128	0.00423771	PPARG, IGF1, JAK2, MMP9	194	33	19414	12.13	0.999996	0.0455398	0.0417228	2.37287
GOTERM_BP_DIRECT	GO:0042102~positive regulation of T cell proliferation	5	2.5641	0.00445483	IL6, PNP, CCL5, IL1B, JAK2	194	67	19414	7.46807	0.999998	0.0476976	0.0436997	2.35117
GOTERM_BP_DIRECT	GO:0045648~positive regulation of erythrocyte differentiation	4	2.05128	0.00461417	STAT1, PRKDC, MAPK14, HIF1A	194	34	19414	11.7732	0.999999	0.0492234	0.0450976	2.33591
GOTERM_BP_DIRECT	GO:0008584~male gonad development	6	3.07692	0.00467841	ACE, INSR, KIT, BCL2, ESR1, TGFBR1	194	109	19414	5.50856	0.999999	0.0497273	0.0455592	2.3299
GOTERM_BP_DIRECT	GO:0007623~circadian rhythm	5	2.5641	0.00494805	GSK3B, NOS2, TOP1, TYMS, TNF	194	69	19414	7.25161	0.999999	0.0524028	0.0480105	2.30557
GOTERM_BP_DIRECT	GO:2001235~positive regulation of apoptotic signaling pathway	4	2.05128	0.00501023	PRKCD, CASP2, JAK2, TGFBR1	194	35	19414	11.4368	1	0.0524907	0.0480911	2.30014
GOTERM_BP_DIRECT	GO:0043542~endothelial cell migration	4	2.05128	0.00501023	NOS3, S100A9, RHOA, TGFBR1	194	35	19414	11.4368	1	0.0524907	0.0480911	2.30014
GOTERM_BP_DIRECT	GO:0090050~positive regulation of cell migration involved in sprouting angiogenesis	4	2.05128	0.00501023	KDR, HMOX1, PTGS2, VEGFA	194	35	19414	11.4368	1	0.0524907	0.0480911	2.30014
GOTERM_BP_DIRECT	GO:1900015~regulation of cytokine production involved in inflammatory response	3	1.53846	0.00509767	NOS2, ALOX5, MAPK14	194	11	19414	27.2924	1	0.0525285	0.0481257	2.29263
GOTERM_BP_DIRECT	GO:0009651~response to salt stress	3	1.53846	0.00509767	HSP90AA1, TNF, TP53	194	11	19414	27.2924	1	0.0525285	0.0481257	2.29263
GOTERM_BP_DIRECT	GO:0097267~omega-hydroxylase P450 pathway	3	1.53846	0.00509767	CYP2C9, CYP2C8, CYP2C19	194	11	19414	27.2924	1	0.0525285	0.0481257	2.29263
GOTERM_BP_DIRECT	GO:0042167~heme catabolic process	3	1.53846	0.00509767	ABCC1, BLVRB, HMOX1	194	11	19414	27.2924	1	0.0525285	0.0481257	2.29263
GOTERM_BP_DIRECT	GO:0010468~regulation of gene expression	9	4.61538	0.00512025	CDK4, MDM2, BCL2, DNMT3B, AHR, IGF1, HIF1A, TGFBR1, TGFBR2	194	265	19414	3.39868	1	0.0525285	0.0481257	2.29071
GOTERM_BP_DIRECT	GO:0007166~cell surface receptor signaling pathway	10	5.12821	0.00512167	EDNRB, ERBB2, CXCR2, MAPK1, MIF, F2, MAPK14, TNF, EGFR, MAPK3	194	323	19414	3.09821	1	0.0525285	0.0481257	2.29059
GOTERM_BP_DIRECT	GO:0009791~post-embryonic development	5	2.5641	0.00520787	BCL2, ITPR1, SOD2, TGFBR1, MTOR	194	70	19414	7.14801	1	0.0532258	0.0487646	2.28334
GOTERM_BP_DIRECT	GO:0097190~apoptotic signaling pathway	5	2.5641	0.00547666	CASP8, CASP3, CASP2, MAP3K5, PPARD	194	71	19414	7.04734	1	0.0555843	0.0509253	2.26148
GOTERM_BP_DIRECT	GO:1901224~positive regulation of NIK/NF-kappaB signaling	5	2.5641	0.00547666	IL1B, TNF, RELA, RHOA, EGFR	194	71	19414	7.04734	1	0.0555843	0.0509253	2.26148
GOTERM_BP_DIRECT	GO:0045765~regulation of angiogenesis	4	2.05128	0.00586228	IL6, ERBB2, HMOX1, PIK3CG	194	37	19414	10.8186	1	0.0592922	0.0543224	2.23193
GOTERM_BP_DIRECT	GO:0043117~positive regulation of vascular permeability	3	1.53846	0.00607736	CXCR2, TACR2, VEGFA	194	12	19414	25.018	1	0.0602174	0.0551701	2.21628
GOTERM_BP_DIRECT	GO:0071806~protein transmembrane transport	3	1.53846	0.00607736	EDNRA, EDNRB, MCL1	194	12	19414	25.018	1	0.0602174	0.0551701	2.21628
GOTERM_BP_DIRECT	GO:0034145~positive regulation of toll-like receptor 4 signaling pathway	3	1.53846	0.00607736	NR1H3, PTPN22, LTF	194	12	19414	25.018	1	0.0602174	0.0551701	2.21628
GOTERM_BP_DIRECT	GO:1903800~positive regulation of production of miRNAs involved in gene silencing by miRNA	3	1.53846	0.00607736	IL6, TP53, EGFR	194	12	19414	25.018	1	0.0602174	0.0551701	2.21628
GOTERM_BP_DIRECT	GO:0006983~ER overload response	3	1.53846	0.00607736	GSK3B, HSPA5, TP53	194	12	19414	25.018	1	0.0602174	0.0551701	2.21628
GOTERM_BP_DIRECT	GO:0050927~positive regulation of positive chemotaxis	3	1.53846	0.00607736	KDR, F3, VEGFA	194	12	19414	25.018	1	0.0602174	0.0551701	2.21628
GOTERM_BP_DIRECT	GO:0051092~positive regulation of NF-kappaB transcription factor activity	7	3.58974	0.006202	ALK, IL1B, CAT, TNF, S100A9, RELA, LTF	194	165	19414	4.24549	1	0.0612447	0.0561113	2.20747
GOTERM_BP_DIRECT	GO:0042311~vasodilation	4	2.05128	0.00631878	EDNRB, NOS3, TNF, PPARD	194	38	19414	10.5339	1	0.0619792	0.0567842	2.19937
GOTERM_BP_DIRECT	GO:0072593~reactive oxygen species metabolic process	4	2.05128	0.00631878	LRRK2, BCL2, NOX4, TP53	194	38	19414	10.5339	1	0.0619792	0.0567842	2.19937
GOTERM_BP_DIRECT	GO:0016477~cell migration	9	4.61538	0.00636367	CDC42, FLT1, MMP2, ITGB3, CDK1, KDR, MMP9, RHOA, PIK3CG	194	275	19414	3.27509	1	0.0622107	0.0569963	2.19629
GOTERM_BP_DIRECT	GO:0033077~T cell differentiation in thymus	4	2.05128	0.00679591	PRKDC, BCL2, TP53, ADA	194	39	19414	10.2638	1	0.0659949	0.0604633	2.16775
GOTERM_BP_DIRECT	GO:0071345~cellular response to cytokine stimulus	4	2.05128	0.00679591	CDK9, ITGA4, FLT3, RHOA	194	39	19414	10.2638	1	0.0659949	0.0604633	2.16775
GOTERM_BP_DIRECT	GO:0030163~protein catabolic process	5	2.5641	0.00695999	NQO1, CASP3, MMP2, RELA, MTOR	194	76	19414	6.5837	1	0.0671421	0.0615144	2.15739
GOTERM_BP_DIRECT	GO:0060326~cell chemotaxis	5	2.5641	0.00695999	ABCC1, KIT, CXCR2, PRKCD, CCR2	194	76	19414	6.5837	1	0.0671421	0.0615144	2.15739
GOTERM_BP_DIRECT	GO:1903238~positive regulation of leukocyte tethering or rolling	3	1.53846	0.0071356	ITGA4, SELE, CCR2	194	13	19414	23.0936	1	0.0683848	0.0626529	2.14657
GOTERM_BP_DIRECT	GO:0033993~response to lipid	3	1.53846	0.0071356	PPARG, PPARA, PPARD	194	13	19414	23.0936	1	0.0683848	0.0626529	2.14657
GOTERM_BP_DIRECT	GO:0033209~tumor necrosis factor-mediated signaling pathway	5	2.5641	0.00762077	STAT1, JAK2, TNF, TP53, RELA	194	78	19414	6.41488	1	0.0725586	0.0664769	2.118
GOTERM_BP_DIRECT	GO:0051402~neuron apoptotic process	5	2.5641	0.00762077	HSPA5, CASP3, BCL2, HIF1A, TP53	194	78	19414	6.41488	1	0.0725586	0.0664769	2.118
GOTERM_BP_DIRECT	GO:0009725~response to hormone	4	2.05128	0.00781297	NQO1, NOS2, NOS3, SORD	194	41	19414	9.76314	1	0.0736687	0.067494	2.10718
GOTERM_BP_DIRECT	GO:0019216~regulation of lipid metabolic process	4	2.05128	0.00781297	HNF4A, PPARG, PPARA, PPARD	194	41	19414	9.76314	1	0.0736687	0.067494	2.10718
GOTERM_BP_DIRECT	GO:0007595~lactation	4	2.05128	0.00781297	VDR, HIF1A, XDH, VEGFA	194	41	19414	9.76314	1	0.0736687	0.067494	2.10718
GOTERM_BP_DIRECT	GO:0048546~digestive tract morphogenesis	3	1.53846	0.00827074	BCL2, HIF1A, EGFR	194	14	19414	21.444	1	0.0774851	0.0709905	2.08246
GOTERM_BP_DIRECT	GO:0080135~regulation of cellular response to stress	3	1.53846	0.00827074	BCL2, OPRM1, MCL1	194	14	19414	21.444	1	0.0774851	0.0709905	2.08246
GOTERM_BP_DIRECT	GO:0043507~positive regulation of JUN kinase activity	4	2.05128	0.00891508	ERN1, PTPN1, TNF, MAP3K5	194	43	19414	9.30904	1	0.0832549	0.0762766	2.04987
GOTERM_BP_DIRECT	GO:0055093~response to hyperoxia	3	1.53846	0.00948116	MMP2, CAT, SOD2	194	15	19414	20.0144	1	0.0858001	0.0786085	2.02314
GOTERM_BP_DIRECT	GO:0019395~fatty acid oxidation	3	1.53846	0.00948116	PPARG, MAPK14, HAO2	194	15	19414	20.0144	1	0.0858001	0.0786085	2.02314
GOTERM_BP_DIRECT	GO:0016242~negative regulation of macroautophagy	3	1.53846	0.00948116	LRRK2, HMOX1, MTOR	194	15	19414	20.0144	1	0.0858001	0.0786085	2.02314
GOTERM_BP_DIRECT	GO:0032966~negative regulation of collagen biosynthetic process	3	1.53846	0.00948116	IL6, PPARG, PPARD	194	15	19414	20.0144	1	0.0858001	0.0786085	2.02314
GOTERM_BP_DIRECT	GO:0048484~enteric nervous system development	3	1.53846	0.00948116	RET, EDNRA, EDNRB	194	15	19414	20.0144	1	0.0858001	0.0786085	2.02314
GOTERM_BP_DIRECT	GO:0070989~oxidative demethylation	3	1.53846	0.00948116	CYP2C9, CYP2C8, CYP3A4	194	15	19414	20.0144	1	0.0858001	0.0786085	2.02314
GOTERM_BP_DIRECT	GO:0045725~positive regulation of glycogen biosynthetic process	3	1.53846	0.00948116	AKT2, INSR, IGF1	194	15	19414	20.0144	1	0.0858001	0.0786085	2.02314
GOTERM_BP_DIRECT	GO:0000302~response to reactive oxygen species	3	1.53846	0.00948116	GSTP1, CAT, HIF1A	194	15	19414	20.0144	1	0.0858001	0.0786085	2.02314
GOTERM_BP_DIRECT	GO:0046655~folic acid metabolic process	3	1.53846	0.00948116	DHFR, FPGS, SLC19A1	194	15	19414	20.0144	1	0.0858001	0.0786085	2.02314
GOTERM_BP_DIRECT	GO:0050427~3'-phosphoadenosine 5'-phosphosulfate metabolic process	3	1.53846	0.00948116	SULT1A1, SULT2B1, SULT1E1	194	15	19414	20.0144	1	0.0858001	0.0786085	2.02314
GOTERM_BP_DIRECT	GO:0045727~positive regulation of translation	5	2.5641	0.0098469	IL6, PRKDC, ERBB2, RHOA, MTOR	194	84	19414	5.95668	1	0.0888348	0.0813888	2.0067
GOTERM_BP_DIRECT	GO:1904706~negative regulation of vascular smooth muscle cell proliferation	4	2.05128	0.0101037	HMOX1, PPARG, SOD2, RHOA	194	45	19414	8.8953	1	0.0904072	0.0828295	1.99552
GOTERM_BP_DIRECT	GO:0032722~positive regulation of chemokine production	4	2.05128	0.0101037	IL6, HMOX1, HIF1A, TNF	194	45	19414	8.8953	1	0.0904072	0.0828295	1.99552
GOTERM_BP_DIRECT	GO:0045087~innate immune response	14	7.17949	0.010114	NQO1, PARP1, PRKDC, ARG1, NR1H4, MIF, PIK3CG, RELA, LGALS3, LCN2, PPARG, S100A9, MAP3K5, LTF	194	627	19414	2.23447	1	0.0904072	0.0828295	1.99508
GOTERM_BP_DIRECT	GO:0007005~mitochondrion organization	5	2.5641	0.0106732	EDNRA, TERT, PARP1, NOS3, LRRK2	194	86	19414	5.81815	1	0.0939309	0.0860578	1.9717
GOTERM_BP_DIRECT	GO:0030890~positive regulation of B cell proliferation	4	2.05128	0.0107308	BCL2, MIF, ADA, IL2	194	46	19414	8.70193	1	0.0939309	0.0860578	1.96937
GOTERM_BP_DIRECT	GO:0014065~phosphatidylinositol 3-kinase signaling	4	2.05128	0.0107308	ERBB2, IGF1, PIK3CG, PPARD	194	46	19414	8.70193	1	0.0939309	0.0860578	1.96937
GOTERM_BP_DIRECT	GO:0090399~replicative senescence	3	1.53846	0.0107653	TERT, CHEK1, TP53	194	16	19414	18.7635	1	0.0939309	0.0860578	1.96798
GOTERM_BP_DIRECT	GO:1903351~cellular response to dopamine	3	1.53846	0.0107653	LRRK2, MAPK1, MAPK3	194	16	19414	18.7635	1	0.0939309	0.0860578	1.96798
GOTERM_BP_DIRECT	GO:0015909~long-chain fatty acid transport	3	1.53846	0.0107653	FABP1, FABP4, PPARG	194	16	19414	18.7635	1	0.0939309	0.0860578	1.96798
GOTERM_BP_DIRECT	GO:0030278~regulation of ossification	3	1.53846	0.0107653	MAPK1, MAPK14, MAPK3	194	16	19414	18.7635	1	0.0939309	0.0860578	1.96798
GOTERM_BP_DIRECT	GO:0010039~response to iron ion	3	1.53846	0.0107653	ALAD, BCL2, HIF1A	194	16	19414	18.7635	1	0.0939309	0.0860578	1.96798
GOTERM_BP_DIRECT	GO:0048538~thymus development	4	2.05128	0.01138	BCL2, MAPK1, TGFBR1, MAPK3	194	47	19414	8.51678	1	0.0989993	0.0907014	1.94386
GOTERM_BP_DIRECT	GO:0042789~mRNA transcription from RNA polymerase II promoter	4	2.05128	0.0120514	VDR, NR1H2, NR1H3, PPARG	194	48	19414	8.33935	1	0.102997	0.0943644	1.91896
GOTERM_BP_DIRECT	GO:0050918~positive chemotaxis	4	2.05128	0.0120514	LGALS3, CCL5, MIF, VEGFA	194	48	19414	8.33935	1	0.102997	0.0943644	1.91896
GOTERM_BP_DIRECT	GO:0045598~regulation of fat cell differentiation	3	1.53846	0.0121215	ALOX5, TNF, PPARD	194	17	19414	17.6598	1	0.102997	0.0943644	1.91644
GOTERM_BP_DIRECT	GO:1900034~regulation of cellular response to heat	3	1.53846	0.0121215	GSK3B, MAPT, MTOR	194	17	19414	17.6598	1	0.102997	0.0943644	1.91644
GOTERM_BP_DIRECT	GO:0051923~sulfation	3	1.53846	0.0121215	SULT1A1, SULT2B1, SULT1E1	194	17	19414	17.6598	1	0.102997	0.0943644	1.91644
GOTERM_BP_DIRECT	GO:0048143~astrocyte activation	3	1.53846	0.0121215	IL1B, MAPT, TNF	194	17	19414	17.6598	1	0.102997	0.0943644	1.91644
GOTERM_BP_DIRECT	GO:0042770~signal transduction in response to DNA damage	3	1.53846	0.0121215	CHEK1, MAPK14, MAPK3	194	17	19414	17.6598	1	0.102997	0.0943644	1.91644
GOTERM_BP_DIRECT	GO:0042119~neutrophil activation	3	1.53846	0.0121215	CCL5, CXCR2, PRKCD	194	17	19414	17.6598	1	0.102997	0.0943644	1.91644
GOTERM_BP_DIRECT	GO:0032880~regulation of protein localization	5	2.5641	0.0129312	HSP90AA1, MAPK8, PARP1, ITGB3, BCL2	194	91	19414	5.49847	1	0.10956	0.100376	1.88836
GOTERM_BP_DIRECT	GO:0034605~cellular response to heat	4	2.05128	0.0134613	HSP90AA1, HMOX1, MAPT, PTGS2	194	50	19414	8.00577	1	0.113472	0.103961	1.87091
GOTERM_BP_DIRECT	GO:0030949~positive regulation of vascular endothelial growth factor receptor signaling pathway	3	1.53846	0.0135483	IL1B, ITGB3, HIF1A	194	18	19414	16.6787	1	0.113472	0.103961	1.86812
GOTERM_BP_DIRECT	GO:0050995~negative regulation of lipid catabolic process	3	1.53846	0.0135483	ALK, IL1B, TNF	194	18	19414	16.6787	1	0.113472	0.103961	1.86812
GOTERM_BP_DIRECT	GO:2000573~positive regulation of DNA biosynthetic process	3	1.53846	0.0135483	NOX4, TNF, VEGFA	194	18	19414	16.6787	1	0.113472	0.103961	1.86812
GOTERM_BP_DIRECT	GO:0003151~outflow tract morphogenesis	4	2.05128	0.0141999	JUN, HIF1A, TGFBR2, VEGFA	194	51	19414	7.8488	1	0.117916	0.108032	1.84771
GOTERM_BP_DIRECT	GO:0009408~response to heat	4	2.05128	0.0141999	HSP90AA1, NOS3, IGF1, MTOR	194	51	19414	7.8488	1	0.117916	0.108032	1.84771
GOTERM_BP_DIRECT	GO:0001837~epithelial to mesenchymal transition	4	2.05128	0.0141999	GSK3B, IGF1, HIF1A, TGFBR1	194	51	19414	7.8488	1	0.117916	0.108032	1.84771
GOTERM_BP_DIRECT	GO:0032956~regulation of actin cytoskeleton organization	5	2.5641	0.0144217	CDC42, ITGB3, PRKCD, RHOA, MTOR	194	94	19414	5.32299	1	0.119081	0.1091	1.84098
GOTERM_BP_DIRECT	GO:0000902~cell morphogenesis	5	2.5641	0.0144217	VDR, ITPR1, NOX4, MAPK14, EGFR	194	94	19414	5.32299	1	0.119081	0.1091	1.84098
GOTERM_BP_DIRECT	GO:0031647~regulation of protein stability	5	2.5641	0.0149416	TERT, CASP3, LRRK2, BCL2, MAPK1	194	95	19414	5.26696	1	0.121141	0.110987	1.8256
GOTERM_BP_DIRECT	GO:0097191~extrinsic apoptotic signaling pathway	4	2.05128	0.0149612	GSK3B, CASP8, JAK2, TNF	194	52	19414	7.69786	1	0.121141	0.110987	1.82503
GOTERM_BP_DIRECT	GO:1904019~epithelial cell apoptotic process	3	1.53846	0.0150442	CASP3, BCL2, HMOX1	194	19	19414	15.8009	1	0.121141	0.110987	1.82263
GOTERM_BP_DIRECT	GO:0060252~positive regulation of glial cell proliferation	3	1.53846	0.0150442	IL6, IL1B, TNF	194	19	19414	15.8009	1	0.121141	0.110987	1.82263
GOTERM_BP_DIRECT	GO:0010759~positive regulation of macrophage chemotaxis	3	1.53846	0.0150442	CCL5, MAPK1, MAPK3	194	19	19414	15.8009	1	0.121141	0.110987	1.82263
GOTERM_BP_DIRECT	GO:0008209~androgen metabolic process	3	1.53846	0.0150442	CYP3A4, ESR1, UGT2B7	194	19	19414	15.8009	1	0.121141	0.110987	1.82263
GOTERM_BP_DIRECT	GO:0001516~prostaglandin biosynthetic process	3	1.53846	0.0150442	MIF, PTGS2, PTGES	194	19	19414	15.8009	1	0.121141	0.110987	1.82263
GOTERM_BP_DIRECT	GO:0030224~monocyte differentiation	3	1.53846	0.0150442	JUN, PPARG, VEGFA	194	19	19414	15.8009	1	0.121141	0.110987	1.82263
GOTERM_BP_DIRECT	GO:0010666~positive regulation of cardiac muscle cell apoptotic process	3	1.53846	0.0150442	CXCR2, TP53, MAP3K5	194	19	19414	15.8009	1	0.121141	0.110987	1.82263
GOTERM_BP_DIRECT	GO:0051496~positive regulation of stress fiber assembly	4	2.05128	0.0157452	CDC42, RHOA, TGFBR1, MTOR	194	53	19414	7.55262	1	0.126437	0.115839	1.80285
GOTERM_BP_DIRECT	GO:0031334~positive regulation of protein complex assembly	4	2.05128	0.0165519	GSK3B, LGALS3, TNF, VEGFA	194	54	19414	7.41275	1	0.1312	0.120203	1.78115
GOTERM_BP_DIRECT	GO:0042310~vasoconstriction	3	1.53846	0.0166076	EDNRA, ACE, EDNRB	194	20	19414	15.0108	1	0.1312	0.120203	1.77969
GOTERM_BP_DIRECT	GO:0006801~superoxide metabolic process	3	1.53846	0.0166076	NOS2, NOX4, SOD2	194	20	19414	15.0108	1	0.1312	0.120203	1.77969
GOTERM_BP_DIRECT	GO:0019373~epoxygenase P450 pathway	3	1.53846	0.0166076	CYP2C9, CYP2C8, CYP2C19	194	20	19414	15.0108	1	0.1312	0.120203	1.77969
GOTERM_BP_DIRECT	GO:0032930~positive regulation of superoxide anion generation	3	1.53846	0.0166076	GSTP1, PRKCD, MAPT	194	20	19414	15.0108	1	0.1312	0.120203	1.77969
GOTERM_BP_DIRECT	GO:0035994~response to muscle stretch	3	1.53846	0.0166076	JUN, MAPK14, RELA	194	20	19414	15.0108	1	0.1312	0.120203	1.77969
GOTERM_BP_DIRECT	GO:0071346~cellular response to interferon-gamma	5	2.5641	0.0171392	CDC42, NOS2, STAT1, CCL5, TNF	194	99	19414	5.05415	1	0.135034	0.123716	1.76601
GOTERM_BP_DIRECT	GO:0030218~erythrocyte differentiation	4	2.05128	0.0173814	FECH, CASP3, KIT, JAK2	194	55	19414	7.27798	1	0.136208	0.124792	1.75992
GOTERM_BP_DIRECT	GO:0016241~regulation of macroautophagy	4	2.05128	0.0173814	ERN1, MAPK8, CASP3, MTOR	194	55	19414	7.27798	1	0.136208	0.124792	1.75992
GOTERM_BP_DIRECT	GO:0016310~phosphorylation	6	3.07692	0.0175827	ALK, LRRK2, TOP1, MTOR, PIK3CG, MAPK3	194	151	19414	3.97638	1	0.137418	0.1259	1.75491
GOTERM_BP_DIRECT	GO:0045600~positive regulation of fat cell differentiation	4	2.05128	0.0182337	SULT1E1, HTR2C, PPARG, PPARD	194	56	19414	7.14801	1	0.139913	0.128186	1.73912
GOTERM_BP_DIRECT	GO:0043154~negative regulation of cysteine-type endopeptidase activity involved in apoptotic process	4	2.05128	0.0182337	FABP1, PTGS2, TNF, VEGFA	194	56	19414	7.14801	1	0.139913	0.128186	1.73912
GOTERM_BP_DIRECT	GO:1902004~positive regulation of beta-amyloid formation	3	1.53846	0.0182371	CASP3, TNF, RELA	194	21	19414	14.296	1	0.139913	0.128186	1.73905
GOTERM_BP_DIRECT	GO:0033554~cellular response to stress	3	1.53846	0.0182371	HIF1A, RELA, MAP3K5	194	21	19414	14.296	1	0.139913	0.128186	1.73905
GOTERM_BP_DIRECT	GO:0060218~hematopoietic stem cell differentiation	3	1.53846	0.0182371	ACE, BCL2, TP53	194	21	19414	14.296	1	0.139913	0.128186	1.73905
GOTERM_BP_DIRECT	GO:0006977~DNA damage response, signal transduction by p53 class mediator resulting in cell cycle arrest	3	1.53846	0.0182371	MDM2, CASP2, TP53	194	21	19414	14.296	1	0.139913	0.128186	1.73905
GOTERM_BP_DIRECT	GO:0060324~face development	3	1.53846	0.0182371	EDNRA, MAPK1, MAPK3	194	21	19414	14.296	1	0.139913	0.128186	1.73905
GOTERM_BP_DIRECT	GO:0007179~transforming growth factor beta receptor signaling pathway	5	2.5641	0.0183097	JUN, PARP1, TP53, TGFBR1, TGFBR2	194	101	19414	4.95407	1	0.140102	0.128359	1.73732
GOTERM_BP_DIRECT	GO:0046718~viral entry into host cell	5	2.5641	0.0189131	ANPEP, ITGB3, INSR, CDK1, EGFR	194	102	19414	4.9055	1	0.144342	0.132243	1.72324
GOTERM_BP_DIRECT	GO:0071320~cellular response to cAMP	4	2.05128	0.019109	HSPA5, AHR, CFTR, PIK3CG	194	57	19414	7.02261	1	0.145284	0.133106	1.71876
GOTERM_BP_DIRECT	GO:0043101~purine-containing compound salvage	2	1.02564	0.0197842	PNP, ADA	194	2	19414	100.072	1	0.145284	0.133106	1.70368
GOTERM_BP_DIRECT	GO:0007497~posterior midgut development	2	1.02564	0.0197842	RET, EDNRB	194	2	19414	100.072	1	0.145284	0.133106	1.70368
GOTERM_BP_DIRECT	GO:0006581~acetylcholine catabolic process	2	1.02564	0.0197842	ACHE, BCHE	194	2	19414	100.072	1	0.145284	0.133106	1.70368
GOTERM_BP_DIRECT	GO:0006148~inosine catabolic process	2	1.02564	0.0197842	PNP, XDH	194	2	19414	100.072	1	0.145284	0.133106	1.70368
GOTERM_BP_DIRECT	GO:0010424~DNA methylation on cytosine within a CG sequence	2	1.02564	0.0197842	DNMT1, EHMT2	194	2	19414	100.072	1	0.145284	0.133106	1.70368
GOTERM_BP_DIRECT	GO:1903597~negative regulation of gap junction assembly	2	1.02564	0.0197842	ACE, IL1B	194	2	19414	100.072	1	0.145284	0.133106	1.70368
GOTERM_BP_DIRECT	GO:1990268~response to gold nanoparticle	2	1.02564	0.0197842	MPO, TNF	194	2	19414	100.072	1	0.145284	0.133106	1.70368
GOTERM_BP_DIRECT	GO:0014806~smooth muscle hyperplasia	2	1.02564	0.0197842	NOS3, HMOX1	194	2	19414	100.072	1	0.145284	0.133106	1.70368
GOTERM_BP_DIRECT	GO:0046390~ribose phosphate biosynthetic process	2	1.02564	0.0197842	G6PD, TKT	194	2	19414	100.072	1	0.145284	0.133106	1.70368
GOTERM_BP_DIRECT	GO:0043103~hypoxanthine salvage	2	1.02564	0.0197842	HPRT1, ADA	194	2	19414	100.072	1	0.145284	0.133106	1.70368
GOTERM_BP_DIRECT	GO:0031620~regulation of fever generation	2	1.02564	0.0197842	EDNRB, PTGES	194	2	19414	100.072	1	0.145284	0.133106	1.70368
GOTERM_BP_DIRECT	GO:0071674~mononuclear cell migration	2	1.02564	0.0197842	LGALS3, PLG	194	2	19414	100.072	1	0.145284	0.133106	1.70368
GOTERM_BP_DIRECT	GO:0006149~deoxyinosine catabolic process	2	1.02564	0.0197842	PNP, XDH	194	2	19414	100.072	1	0.145284	0.133106	1.70368
GOTERM_BP_DIRECT	GO:0097018~renal albumin absorption	2	1.02564	0.0197842	EDNRA, EDNRB	194	2	19414	100.072	1	0.145284	0.133106	1.70368
GOTERM_BP_DIRECT	GO:0097194~execution phase of apoptosis	3	1.53846	0.0199312	CASP8, CASP3, CASP2	194	22	19414	13.6462	1	0.145284	0.133106	1.70047
GOTERM_BP_DIRECT	GO:0010613~positive regulation of cardiac muscle hypertrophy	3	1.53846	0.0199312	CDK9, PARP1, IGF1	194	22	19414	13.6462	1	0.145284	0.133106	1.70047
GOTERM_BP_DIRECT	GO:0006939~smooth muscle contraction	3	1.53846	0.0199312	EDNRA, TBXA2R, ADA	194	22	19414	13.6462	1	0.145284	0.133106	1.70047
GOTERM_BP_DIRECT	GO:0034644~cellular response to UV	4	2.05128	0.0200072	PARP1, PRKCD, PTGS2, TP53	194	58	19414	6.90153	1	0.145475	0.133282	1.69881
GOTERM_BP_DIRECT	GO:0045785~positive regulation of cell adhesion	4	2.05128	0.0209283	CCL5, ERBB2, TNF, VEGFA	194	59	19414	6.78455	1	0.151045	0.138385	1.67927
GOTERM_BP_DIRECT	GO:0002931~response to ischemia	4	2.05128	0.0209283	NQO1, BCL2, TP53, MAP3K5	194	59	19414	6.78455	1	0.151045	0.138385	1.67927
GOTERM_BP_DIRECT	GO:0010507~negative regulation of autophagy	4	2.05128	0.0209283	BCL2, PTPN22, MTOR, MCL1	194	59	19414	6.78455	1	0.151045	0.138385	1.67927
GOTERM_BP_DIRECT	GO:0032760~positive regulation of tumor necrosis factor production	5	2.5641	0.0214494	IL6, LRRK2, MIF, JAK2, CCR2	194	106	19414	4.72039	1	0.154425	0.141481	1.66859
GOTERM_BP_DIRECT	GO:0006809~nitric oxide biosynthetic process	3	1.53846	0.0216885	NQO1, NOS2, NOS3	194	23	19414	13.0529	1	0.154623	0.141663	1.66377
GOTERM_BP_DIRECT	GO:0002053~positive regulation of mesenchymal cell proliferation	3	1.53846	0.0216885	STAT1, KDR, TGFBR2	194	23	19414	13.0529	1	0.154623	0.141663	1.66377
GOTERM_BP_DIRECT	GO:0046889~positive regulation of lipid biosynthetic process	3	1.53846	0.0216885	NR1H3, PPARA, MTOR	194	23	19414	13.0529	1	0.154623	0.141663	1.66377
GOTERM_BP_DIRECT	GO:0030318~melanocyte differentiation	3	1.53846	0.0216885	EDNRB, KIT, BCL2	194	23	19414	13.0529	1	0.154623	0.141663	1.66377
GOTERM_BP_DIRECT	GO:0050768~negative regulation of neurogenesis	3	1.53846	0.0235075	IL6, IL1B, TNF	194	24	19414	12.509	1	0.166778	0.152799	1.62879
GOTERM_BP_DIRECT	GO:0051247~positive regulation of protein metabolic process	3	1.53846	0.0235075	MAPK8, NR1H2, NR1H3	194	24	19414	12.509	1	0.166778	0.152799	1.62879
GOTERM_BP_DIRECT	GO:0045860~positive regulation of protein kinase activity	4	2.05128	0.0238294	LRRK2, TNF, CDC25B, MAP3K5	194	62	19414	6.45627	1	0.168652	0.154516	1.62289
GOTERM_BP_DIRECT	GO:0032094~response to food	3	1.53846	0.025387	G6PD, OPRM1, MPO	194	25	19414	12.0087	1	0.177103	0.162259	1.59539
GOTERM_BP_DIRECT	GO:0060586~multicellular organismal iron ion homeostasis	3	1.53846	0.025387	FECH, HMOX1, SOD2	194	25	19414	12.0087	1	0.177103	0.162259	1.59539
GOTERM_BP_DIRECT	GO:0051493~regulation of cytoskeleton organization	3	1.53846	0.025387	MAPK1, S100A9, MAPK3	194	25	19414	12.0087	1	0.177103	0.162259	1.59539
GOTERM_BP_DIRECT	GO:0048844~artery morphogenesis	3	1.53846	0.025387	TGFBR1, TGFBR2, VEGFA	194	25	19414	12.0087	1	0.177103	0.162259	1.59539
GOTERM_BP_DIRECT	GO:0051090~regulation of sequence-specific DNA binding transcription factor activity	3	1.53846	0.025387	MAPK8, HMOX1, MAPK3	194	25	19414	12.0087	1	0.177103	0.162259	1.59539
GOTERM_BP_DIRECT	GO:0043401~steroid hormone mediated signaling pathway	3	1.53846	0.025387	MAPK1, PPARA, PPARD	194	25	19414	12.0087	1	0.177103	0.162259	1.59539
GOTERM_BP_DIRECT	GO:0032731~positive regulation of interleukin-1 beta production	4	2.05128	0.0258783	IL6, CASP8, JAK2, TNF	194	64	19414	6.25451	1	0.180101	0.165005	1.58706
GOTERM_BP_DIRECT	GO:0006874~cellular calcium ion homeostasis	5	2.5641	0.0263683	EDNRA, VDR, CCL5, HTR2C, CCR2	194	113	19414	4.42797	1	0.183075	0.16773	1.57892
GOTERM_BP_DIRECT	GO:0030097~hemopoiesis	4	2.05128	0.0269371	FLT3, KIT, SOD2, CCR2	194	65	19414	6.15829	1	0.186581	0.170942	1.56965
GOTERM_BP_DIRECT	GO:0071542~dopaminergic neuron differentiation	3	1.53846	0.0273255	HPRT1, HIF1A, VEGFA	194	26	19414	11.5468	1	0.188379	0.172589	1.56343
GOTERM_BP_DIRECT	GO:0002092~positive regulation of receptor internalization	3	1.53846	0.0273255	INSR, SELE, VEGFA	194	26	19414	11.5468	1	0.188379	0.172589	1.56343
GOTERM_BP_DIRECT	GO:0007611~learning or memory	4	2.05128	0.0280189	CASP3, MAPK1, MAPT, EGFR	194	66	19414	6.06498	1	0.192251	0.176137	1.55255
GOTERM_BP_DIRECT	GO:0001819~positive regulation of cytokine production	4	2.05128	0.0280189	IL1B, MIF, TNF, PIK3CG	194	66	19414	6.06498	1	0.192251	0.176137	1.55255
GOTERM_BP_DIRECT	GO:0007049~cell cycle	9	4.61538	0.0286836	PRKCD, MDM2, MAPK1, AHR, CDC25C, NR3C1, TP53, CDC25B, MAPK3	194	362	19414	2.48798	1	0.195727	0.179322	1.54237
GOTERM_BP_DIRECT	GO:0010595~positive regulation of endothelial cell migration	4	2.05128	0.0291234	ITGB3, KDR, PIK3CG, VEGFA	194	67	19414	5.97446	1	0.195727	0.179322	1.53576
GOTERM_BP_DIRECT	GO:0001935~endothelial cell proliferation	3	1.53846	0.0293217	ERN1, HMOX1, TGFBR1	194	27	19414	11.1191	1	0.195727	0.179322	1.53281
GOTERM_BP_DIRECT	GO:0002639~positive regulation of immunoglobulin production	3	1.53846	0.0293217	IL6, RBP4, IL2	194	27	19414	11.1191	1	0.195727	0.179322	1.53281
GOTERM_BP_DIRECT	GO:0060333~interferon-gamma-mediated signaling pathway	3	1.53846	0.0293217	STAT1, JAK2, TP53	194	27	19414	11.1191	1	0.195727	0.179322	1.53281
GOTERM_BP_DIRECT	GO:0042744~hydrogen peroxide catabolic process	3	1.53846	0.0293217	PRDX5, CAT, MPO	194	27	19414	11.1191	1	0.195727	0.179322	1.53281
GOTERM_BP_DIRECT	GO:0014042~positive regulation of neuron maturation	2	1.02564	0.0295298	RET, BCL2	194	3	19414	66.7148	1	0.195727	0.179322	1.52974
GOTERM_BP_DIRECT	GO:1904999~positive regulation of leukocyte adhesion to arterial endothelial cell	2	1.02564	0.0295298	ALOX5, TNF	194	3	19414	66.7148	1	0.195727	0.179322	1.52974
GOTERM_BP_DIRECT	GO:0086101~endothelin receptor signaling pathway involved in heart process	2	1.02564	0.0295298	CDC42, EDNRA	194	3	19414	66.7148	1	0.195727	0.179322	1.52974
GOTERM_BP_DIRECT	GO:0046038~GMP catabolic process	2	1.02564	0.0295298	HPRT1, XDH	194	3	19414	66.7148	1	0.195727	0.179322	1.52974
GOTERM_BP_DIRECT	GO:0031644~regulation of neurological system process	2	1.02564	0.0295298	NOS3, HTR2C	194	3	19414	66.7148	1	0.195727	0.179322	1.52974
GOTERM_BP_DIRECT	GO:0002679~respiratory burst involved in defense response	2	1.02564	0.0295298	MPO, PIK3CG	194	3	19414	66.7148	1	0.195727	0.179322	1.52974
GOTERM_BP_DIRECT	GO:1905039~carboxylic acid transmembrane transport	2	1.02564	0.0295298	ABCC1, ABCB1	194	3	19414	66.7148	1	0.195727	0.179322	1.52974
GOTERM_BP_DIRECT	GO:0061308~cardiac neural crest cell development involved in heart development	2	1.02564	0.0295298	MAPK1, MAPK3	194	3	19414	66.7148	1	0.195727	0.179322	1.52974
GOTERM_BP_DIRECT	GO:0060559~positive regulation of calcidiol 1-monooxygenase activity	2	1.02564	0.0295298	IL1B, TNF	194	3	19414	66.7148	1	0.195727	0.179322	1.52974
GOTERM_BP_DIRECT	GO:0030168~platelet activation	4	2.05128	0.0302508	IL6, ITGB3, F2, MAPK14	194	68	19414	5.8866	1	0.199684	0.182947	1.51926
GOTERM_BP_DIRECT	GO:0001822~kidney development	5	2.5641	0.0302634	ACE, ODC1, RHOA, TGFBR1, VEGFA	194	118	19414	4.24035	1	0.199684	0.182947	1.51908
GOTERM_BP_DIRECT	GO:1902042~negative regulation of extrinsic apoptotic signaling pathway via death domain receptors	3	1.53846	0.0313742	GSK3B, NOS3, HMOX1	194	28	19414	10.722	1	0.204703	0.187545	1.50343
GOTERM_BP_DIRECT	GO:0045740~positive regulation of DNA replication	3	1.53846	0.0313742	CDC42, CDK1, EGFR	194	28	19414	10.722	1	0.204703	0.187545	1.50343
GOTERM_BP_DIRECT	GO:2001243~negative regulation of intrinsic apoptotic signaling pathway	3	1.53846	0.0313742	BCL2, MMP9, MCL1	194	28	19414	10.722	1	0.204703	0.187545	1.50343
GOTERM_BP_DIRECT	GO:0034620~cellular response to unfolded protein	3	1.53846	0.0313742	ERN1, PTPN1, HSPA5	194	28	19414	10.722	1	0.204703	0.187545	1.50343
GOTERM_BP_DIRECT	GO:0050900~leukocyte migration	3	1.53846	0.0313742	SELL, MMP9, ADA	194	28	19414	10.722	1	0.204703	0.187545	1.50343
GOTERM_BP_DIRECT	GO:0006366~transcription from RNA polymerase II promoter	7	3.58974	0.0319083	CDK9, PARP1, HNF4A, NR1H4, JAK2, MAPK14, IL2	194	238	19414	2.9433	1	0.207283	0.189909	1.4961
GOTERM_BP_DIRECT	GO:0009617~response to bacterium	5	2.5641	0.0319116	FABP4, CA3, NOS2, KYAT1, PYGL	194	120	19414	4.16967	1	0.207283	0.189909	1.49605
GOTERM_BP_DIRECT	GO:0071300~cellular response to retinoic acid	4	2.05128	0.0325737	RET, GSK3B, PPARG, TNF	194	70	19414	5.71841	1	0.211115	0.19342	1.48713
GOTERM_BP_DIRECT	GO:0010043~response to zinc ion	3	1.53846	0.0334818	ALAD, ARG1, SOD2	194	29	19414	10.3523	1	0.215567	0.197498	1.47519
GOTERM_BP_DIRECT	GO:0030878~thyroid gland development	3	1.53846	0.0334818	EDNRA, MAPK1, MAPK3	194	29	19414	10.3523	1	0.215567	0.197498	1.47519
GOTERM_BP_DIRECT	GO:0045776~negative regulation of blood pressure	3	1.53846	0.0334818	NOS2, NOS3, PPARA	194	29	19414	10.3523	1	0.215567	0.197498	1.47519
GOTERM_BP_DIRECT	GO:0009611~response to wounding	4	2.05128	0.0337692	EDNRA, ADORA3, F2, CCR2	194	71	19414	5.63787	1	0.216939	0.198756	1.47148
GOTERM_BP_DIRECT	GO:0010592~positive regulation of lamellipodium assembly	3	1.53846	0.0356432	CDC42, HSP90AA1, MTOR	194	30	19414	10.0072	1	0.225998	0.207055	1.44802
GOTERM_BP_DIRECT	GO:0071480~cellular response to gamma radiation	3	1.53846	0.0356432	HSPA5, MDM2, TP53	194	30	19414	10.0072	1	0.225998	0.207055	1.44802
GOTERM_BP_DIRECT	GO:0048873~homeostasis of number of cells within a tissue	3	1.53846	0.0356432	NOS3, BCL2, CCR2	194	30	19414	10.0072	1	0.225998	0.207055	1.44802
GOTERM_BP_DIRECT	GO:0042220~response to cocaine	3	1.53846	0.0356432	HSP90AA1, HSPA5, OPRM1	194	30	19414	10.0072	1	0.225998	0.207055	1.44802
GOTERM_BP_DIRECT	GO:0061098~positive regulation of protein tyrosine kinase activity	3	1.53846	0.0356432	PTPN1, ACE, NOX4	194	30	19414	10.0072	1	0.225998	0.207055	1.44802
GOTERM_BP_DIRECT	GO:0007202~activation of phospholipase C activity	3	1.53846	0.0356432	EDNRA, SELE, EGFR	194	30	19414	10.0072	1	0.225998	0.207055	1.44802
GOTERM_BP_DIRECT	GO:0030308~negative regulation of cell growth	5	2.5641	0.0371674	HNF4A, BCL2, PPARG, TP53, PPARD	194	126	19414	3.97112	1	0.232765	0.213255	1.42984
GOTERM_BP_DIRECT	GO:0015908~fatty acid transport	3	1.53846	0.037857	FABP1, FABP4, PPARD	194	31	19414	9.6844	1	0.232765	0.213255	1.42185
GOTERM_BP_DIRECT	GO:0051968~positive regulation of synaptic transmission, glutamatergic	3	1.53846	0.037857	PTGS2, GLUL, CCR2	194	31	19414	9.6844	1	0.232765	0.213255	1.42185
GOTERM_BP_DIRECT	GO:0001676~long-chain fatty acid metabolic process	3	1.53846	0.037857	CPT1A, ALOX5, CYP2C19	194	31	19414	9.6844	1	0.232765	0.213255	1.42185
GOTERM_BP_DIRECT	GO:0035987~endodermal cell differentiation	3	1.53846	0.037857	ITGA4, MMP2, MMP9	194	31	19414	9.6844	1	0.232765	0.213255	1.42185
GOTERM_BP_DIRECT	GO:0010033~response to organic substance	3	1.53846	0.037857	CDK4, ANXA5, RELA	194	31	19414	9.6844	1	0.232765	0.213255	1.42185
GOTERM_BP_DIRECT	GO:0006082~organic acid metabolic process	3	1.53846	0.037857	CYP2C9, CYP2C8, CYP2C19	194	31	19414	9.6844	1	0.232765	0.213255	1.42185
GOTERM_BP_DIRECT	GO:0045907~positive regulation of vasoconstriction	3	1.53846	0.037857	ACE, TBXA2R, PTGS2	194	31	19414	9.6844	1	0.232765	0.213255	1.42185
GOTERM_BP_DIRECT	GO:0048009~insulin-like growth factor receptor signaling pathway	3	1.53846	0.037857	MAPK1, IGF1, MAPK3	194	31	19414	9.6844	1	0.232765	0.213255	1.42185
GOTERM_BP_DIRECT	GO:0032868~response to insulin	4	2.05128	0.0387759	CAT, MAPK14, PPARA, MTOR	194	75	19414	5.33718	1	0.232765	0.213255	1.41144
GOTERM_BP_DIRECT	GO:0010467~gene expression	5	2.5641	0.0390236	EDNRA, EDNRB, NOX4, NR3C1, IL2	194	128	19414	3.90907	1	0.232765	0.213255	1.40867
GOTERM_BP_DIRECT	GO:0090170~regulation of Golgi inheritance	2	1.02564	0.039179	MAPK1, MAPK3	194	4	19414	50.0361	1	0.232765	0.213255	1.40695
GOTERM_BP_DIRECT	GO:0060978~angiogenesis involved in coronary vascular morphogenesis	2	1.02564	0.039179	ACE, TGFBR1	194	4	19414	50.0361	1	0.232765	0.213255	1.40695
GOTERM_BP_DIRECT	GO:0018916~nitrobenzene metabolic process	2	1.02564	0.039179	GSTM2, GSTM1	194	4	19414	50.0361	1	0.232765	0.213255	1.40695
GOTERM_BP_DIRECT	GO:0072717~cellular response to actinomycin D	2	1.02564	0.039179	MDM2, TP53	194	4	19414	50.0361	1	0.232765	0.213255	1.40695
GOTERM_BP_DIRECT	GO:0030730~sequestering of triglyceride	2	1.02564	0.039179	IL1B, TNF	194	4	19414	50.0361	1	0.232765	0.213255	1.40695
GOTERM_BP_DIRECT	GO:0060745~mammary gland branching involved in pregnancy	2	1.02564	0.039179	VDR, ESR1	194	4	19414	50.0361	1	0.232765	0.213255	1.40695
GOTERM_BP_DIRECT	GO:0070849~response to epidermal growth factor	2	1.02564	0.039179	MAPK1, MAPK3	194	4	19414	50.0361	1	0.232765	0.213255	1.40695
GOTERM_BP_DIRECT	GO:0090258~negative regulation of mitochondrial fission	2	1.02564	0.039179	PPARG, MAPT	194	4	19414	50.0361	1	0.232765	0.213255	1.40695
GOTERM_BP_DIRECT	GO:0010574~regulation of vascular endothelial growth factor production	2	1.02564	0.039179	IL6, CCR2	194	4	19414	50.0361	1	0.232765	0.213255	1.40695
GOTERM_BP_DIRECT	GO:0002328~pro-B cell differentiation	2	1.02564	0.039179	FLT3, PRKDC	194	4	19414	50.0361	1	0.232765	0.213255	1.40695
GOTERM_BP_DIRECT	GO:0006154~adenosine catabolic process	2	1.02564	0.039179	XDH, ADA	194	4	19414	50.0361	1	0.232765	0.213255	1.40695
GOTERM_BP_DIRECT	GO:0010876~lipid localization	2	1.02564	0.039179	CPT1A, PPARA	194	4	19414	50.0361	1	0.232765	0.213255	1.40695
GOTERM_BP_DIRECT	GO:0048550~negative regulation of pinocytosis	2	1.02564	0.039179	NR1H2, NR1H3	194	4	19414	50.0361	1	0.232765	0.213255	1.40695
GOTERM_BP_DIRECT	GO:0060159~regulation of dopamine receptor signaling pathway	2	1.02564	0.039179	ALK, LRRK2	194	4	19414	50.0361	1	0.232765	0.213255	1.40695
GOTERM_BP_DIRECT	GO:0035900~response to isolation stress	2	1.02564	0.039179	SOD2, TNF	194	4	19414	50.0361	1	0.232765	0.213255	1.40695
GOTERM_BP_DIRECT	GO:0010044~response to aluminum ion	2	1.02564	0.039179	ALAD, MAOB	194	4	19414	50.0361	1	0.232765	0.213255	1.40695
GOTERM_BP_DIRECT	GO:0002906~negative regulation of mature B cell apoptotic process	2	1.02564	0.039179	MIF, ADA	194	4	19414	50.0361	1	0.232765	0.213255	1.40695
GOTERM_BP_DIRECT	GO:1904772~response to tetrachloromethane	2	1.02564	0.039179	NQO1, CPT1A	194	4	19414	50.0361	1	0.232765	0.213255	1.40695
GOTERM_BP_DIRECT	GO:1900086~positive regulation of peptidyl-tyrosine autophosphorylation	2	1.02564	0.039179	ACE, VEGFA	194	4	19414	50.0361	1	0.232765	0.213255	1.40695
GOTERM_BP_DIRECT	GO:0043415~positive regulation of skeletal muscle tissue regeneration	2	1.02564	0.039179	TGFBR2, PPARD	194	4	19414	50.0361	1	0.232765	0.213255	1.40695
GOTERM_BP_DIRECT	GO:0016239~positive regulation of macroautophagy	3	1.53846	0.0401221	KDR, HMOX1, HIF1A	194	32	19414	9.38177	1	0.235496	0.215757	1.39662
GOTERM_BP_DIRECT	GO:0032148~activation of protein kinase B activity	3	1.53846	0.0401221	INSR, IGF1, MTOR	194	32	19414	9.38177	1	0.235496	0.215757	1.39662
GOTERM_BP_DIRECT	GO:0048008~platelet-derived growth factor receptor signaling pathway	3	1.53846	0.0401221	ITGB3, PLAT, JAK2	194	32	19414	9.38177	1	0.235496	0.215757	1.39662
GOTERM_BP_DIRECT	GO:1900017~positive regulation of cytokine production involved in inflammatory response	3	1.53846	0.0401221	IL6, HIF1A, TNF	194	32	19414	9.38177	1	0.235496	0.215757	1.39662
GOTERM_BP_DIRECT	GO:0043392~negative regulation of DNA binding	3	1.53846	0.0401221	JUN, HMOX1, JAK2	194	32	19414	9.38177	1	0.235496	0.215757	1.39662
GOTERM_BP_DIRECT	GO:0006306~DNA methylation	3	1.53846	0.0401221	DNMT1, EHMT2, DNMT3B	194	32	19414	9.38177	1	0.235496	0.215757	1.39662
GOTERM_BP_DIRECT	GO:0032092~positive regulation of protein binding	4	2.05128	0.0414131	GSK3B, ACE, TERT, LRRK2	194	77	19414	5.19855	1	0.242586	0.222253	1.38286
GOTERM_BP_DIRECT	GO:0048147~negative regulation of fibroblast proliferation	3	1.53846	0.0424372	GSTP1, SOD2, TP53	194	33	19414	9.09747	1	0.248088	0.227294	1.37225
GOTERM_BP_DIRECT	GO:0032720~negative regulation of tumor necrosis factor production	4	2.05128	0.0441384	GSTP1, NR1H4, PTPN22, IGF1	194	79	19414	5.06695	1	0.257005	0.235464	1.35518
GOTERM_BP_DIRECT	GO:0001933~negative regulation of protein phosphorylation	4	2.05128	0.0441384	PRKDC, LRRK2, XDH, IL2	194	79	19414	5.06695	1	0.257005	0.235464	1.35518
GOTERM_BP_DIRECT	GO:0051973~positive regulation of telomerase activity	3	1.53846	0.0448012	HSP90AA1, MAPK1, MAPK3	194	34	19414	8.8299	1	0.259829	0.238051	1.34871
GOTERM_BP_DIRECT	GO:0048144~fibroblast proliferation	3	1.53846	0.0448012	CDK1, ESR1, TP53	194	34	19414	8.8299	1	0.259829	0.238051	1.34871
GOTERM_BP_DIRECT	GO:0002244~hematopoietic progenitor cell differentiation	4	2.05128	0.0455339	FLT1, KIT, KDR, TP53	194	80	19414	5.00361	1	0.263556	0.241465	1.34167
GOTERM_BP_DIRECT	GO:1990090~cellular response to nerve growth factor stimulus	3	1.53846	0.0472127	HSPA5, PARP1, MAPT	194	35	19414	8.57761	1	0.266753	0.244394	1.32594
GOTERM_BP_DIRECT	GO:0002027~regulation of heart rate	3	1.53846	0.0472127	EDNRA, EDNRB, MDM2	194	35	19414	8.57761	1	0.266753	0.244394	1.32594
GOTERM_BP_DIRECT	GO:0002230~positive regulation of defense response to virus by host	3	1.53846	0.0472127	HSP90AA1, STAT1, PTPN22	194	35	19414	8.57761	1	0.266753	0.244394	1.32594
GOTERM_BP_DIRECT	GO:0055072~iron ion homeostasis	3	1.53846	0.0472127	HMOX1, SOD2, LTF	194	35	19414	8.57761	1	0.266753	0.244394	1.32594
GOTERM_BP_DIRECT	GO:0050873~brown fat cell differentiation	3	1.53846	0.0472127	FABP4, ADRB3, PTGS2	194	35	19414	8.57761	1	0.266753	0.244394	1.32594
GOTERM_BP_DIRECT	GO:0001503~ossification	4	2.05128	0.0483898	BCL2, MMP9, EGFR, LTF	194	82	19414	4.88157	1	0.266753	0.244394	1.31525
GOTERM_BP_DIRECT	GO:1905007~positive regulation of epithelial to mesenchymal transition involved in endocardial cushion formation	2	1.02564	0.0487328	TGFBR1, TGFBR2	194	5	19414	40.0289	1	0.266753	0.244394	1.31218
GOTERM_BP_DIRECT	GO:0071284~cellular response to lead ion	2	1.02564	0.0487328	ALAD, PTGS2	194	5	19414	40.0289	1	0.266753	0.244394	1.31218
GOTERM_BP_DIRECT	GO:0018119~peptidyl-cysteine S-nitrosylation	2	1.02564	0.0487328	NOS2, S100A9	194	5	19414	40.0289	1	0.266753	0.244394	1.31218
GOTERM_BP_DIRECT	GO:0070857~regulation of bile acid biosynthetic process	2	1.02564	0.0487328	NR1H4, CES1	194	5	19414	40.0289	1	0.266753	0.244394	1.31218
GOTERM_BP_DIRECT	GO:0090116~C-5 methylation of cytosine	2	1.02564	0.0487328	DNMT1, DNMT3B	194	5	19414	40.0289	1	0.266753	0.244394	1.31218
GOTERM_BP_DIRECT	GO:0032310~prostaglandin secretion	2	1.02564	0.0487328	NOS2, PTGS2	194	5	19414	40.0289	1	0.266753	0.244394	1.31218
GOTERM_BP_DIRECT	GO:0032263~GMP salvage	2	1.02564	0.0487328	HPRT1, ADA	194	5	19414	40.0289	1	0.266753	0.244394	1.31218
GOTERM_BP_DIRECT	GO:0043243~positive regulation of protein complex disassembly	2	1.02564	0.0487328	INSR, TNF	194	5	19414	40.0289	1	0.266753	0.244394	1.31218
GOTERM_BP_DIRECT	GO:0006196~AMP catabolic process	2	1.02564	0.0487328	XDH, ADA	194	5	19414	40.0289	1	0.266753	0.244394	1.31218
GOTERM_BP_DIRECT	GO:0002360~T cell lineage commitment	2	1.02564	0.0487328	PRKDC, TP53	194	5	19414	40.0289	1	0.266753	0.244394	1.31218
GOTERM_BP_DIRECT	GO:0033591~response to L-ascorbic acid	2	1.02564	0.0487328	CAT, SOD2	194	5	19414	40.0289	1	0.266753	0.244394	1.31218
GOTERM_BP_DIRECT	GO:0030202~heparin metabolic process	2	1.02564	0.0487328	EDNRA, EDNRB	194	5	19414	40.0289	1	0.266753	0.244394	1.31218
GOTERM_BP_DIRECT	GO:0044209~AMP salvage	2	1.02564	0.0487328	HPRT1, ADA	194	5	19414	40.0289	1	0.266753	0.244394	1.31218
GOTERM_BP_DIRECT	GO:0038033~positive regulation of endothelial cell chemotaxis by VEGF-activated vascular endothelial growth factor receptor signaling pathway	2	1.02564	0.0487328	KDR, VEGFA	194	5	19414	40.0289	1	0.266753	0.244394	1.31218
GOTERM_BP_DIRECT	GO:0045899~positive regulation of RNA polymerase II transcriptional preinitiation complex assembly	2	1.02564	0.0487328	ESR1, TP53	194	5	19414	40.0289	1	0.266753	0.244394	1.31218
GOTERM_BP_DIRECT	GO:0070458~cellular detoxification of nitrogen compound	2	1.02564	0.0487328	GSTM2, GSTM1	194	5	19414	40.0289	1	0.266753	0.244394	1.31218
GOTERM_BP_DIRECT	GO:0060574~intestinal epithelial cell maturation	2	1.02564	0.0487328	TYMS, HIF1A	194	5	19414	40.0289	1	0.266753	0.244394	1.31218
GOTERM_BP_DIRECT	GO:0019640~glucuronate catabolic process to xylulose 5-phosphate	2	1.02564	0.0487328	AKR1A1, SORD	194	5	19414	40.0289	1	0.266753	0.244394	1.31218
GOTERM_BP_DIRECT	GO:0045964~positive regulation of dopamine metabolic process	2	1.02564	0.0487328	MAOB, HPRT1	194	5	19414	40.0289	1	0.266753	0.244394	1.31218
GOTERM_BP_DIRECT	GO:0009635~response to herbicide	2	1.02564	0.0487328	ALAD, ARG1	194	5	19414	40.0289	1	0.266753	0.244394	1.31218
GOTERM_BP_DIRECT	GO:0006204~IMP catabolic process	2	1.02564	0.0487328	PNP, XDH	194	5	19414	40.0289	1	0.266753	0.244394	1.31218
GOTERM_BP_DIRECT	GO:0009750~response to fructose	2	1.02564	0.0487328	PTGS2, TNF	194	5	19414	40.0289	1	0.266753	0.244394	1.31218
GOTERM_BP_DIRECT	GO:0072584~caveolin-mediated endocytosis	2	1.02564	0.0487328	MAPK1, MAPK3	194	5	19414	40.0289	1	0.266753	0.244394	1.31218
GOTERM_BP_DIRECT	GO:0032743~positive regulation of interleukin-2 production	3	1.53846	0.0496708	PNP, IL1B, CCR2	194	36	19414	8.33935	1	0.27084	0.248139	1.3039
GOTERM_BP_DIRECT	GO:0070328~triglyceride homeostasis	3	1.53846	0.0496708	HNF4A, NR1H4, NR1H3	194	36	19414	8.33935	1	0.27084	0.248139	1.3039
GOTERM_BP_DIRECT	GO:0036211~protein modification process	4	2.05128	0.0498501	PARP1, PRKDC, AKT2, PLAT	194	83	19414	4.82275	1	0.27084	0.248139	1.30233
GOTERM_BP_DIRECT	GO:0030324~lung development	4	2.05128	0.0498501	RBP4, NOS3, ARG1, VEGFA	194	83	19414	4.82275	1	0.27084	0.248139	1.30233
GOTERM_BP_DIRECT	GO:0051726~regulation of cell cycle	7	3.58974	0.0504496	CDK9, JUN, CDK4, AKT2, MDM2, TP53, TGFBR1	194	267	19414	2.62361	1	0.273588	0.250657
GOTERM_BP_DIRECT	GO:0071347~cellular response to interleukin-1	4	2.05128	0.0513317	CCL5, MMP2, HIF1A, RELA	194	84	19414	4.76534	1	0.277857	0.254567
GOTERM_BP_DIRECT	GO:0051603~proteolysis involved in cellular protein catabolic process	3	1.53846	0.0521741	CASP8, HSPA5, MDM2	194	37	19414	8.11396	1	0.279826	0.256371
GOTERM_BP_DIRECT	GO:0007190~activation of adenylate cyclase activity	3	1.53846	0.0521741	EDNRA, ADRB3, ADORA3	194	37	19414	8.11396	1	0.279826	0.256371
GOTERM_BP_DIRECT	GO:0070507~regulation of microtubule cytoskeleton organization	3	1.53846	0.0521741	GSK3B, MAPT, RHOA	194	37	19414	8.11396	1	0.279826	0.256371
GOTERM_BP_DIRECT	GO:0006730~one-carbon metabolic process	3	1.53846	0.0521741	DHFR, CA3, FPGS	194	37	19414	8.11396	1	0.279826	0.256371
GOTERM_BP_DIRECT	GO:0060412~ventricular septum morphogenesis	3	1.53846	0.0521741	NOS3, TGFBR1, TGFBR2	194	37	19414	8.11396	1	0.279826	0.256371
GOTERM_BP_DIRECT	GO:1900182~positive regulation of protein localization to nucleus	3	1.53846	0.0547216	PARP1, CDK1, F2	194	38	19414	7.90043	1	0.289767	0.265479
GOTERM_BP_DIRECT	GO:0070555~response to interleukin-1	3	1.53846	0.0547216	IL1B, SELE, RELA	194	38	19414	7.90043	1	0.289767	0.265479
GOTERM_BP_DIRECT	GO:0048678~response to axon injury	3	1.53846	0.0547216	ARG1, CDK1, SOD2	194	38	19414	7.90043	1	0.289767	0.265479
GOTERM_BP_DIRECT	GO:0010634~positive regulation of epithelial cell migration	3	1.53846	0.0547216	JUN, HIF1A, TGFBR2	194	38	19414	7.90043	1	0.289767	0.265479
GOTERM_BP_DIRECT	GO:0001890~placenta development	3	1.53846	0.0547216	PPARG, MAPK14, ADA	194	38	19414	7.90043	1	0.289767	0.265479
GOTERM_BP_DIRECT	GO:0031333~negative regulation of protein complex assembly	3	1.53846	0.0547216	CDC42, GSK3B, HSPA5	194	38	19414	7.90043	1	0.289767	0.265479
GOTERM_BP_DIRECT	GO:0048469~cell maturation	3	1.53846	0.0547216	KDR, PPARG, VEGFA	194	38	19414	7.90043	1	0.289767	0.265479
GOTERM_BP_DIRECT	GO:0006953~acute-phase response	3	1.53846	0.0573122	IL6, SERPINA1, F2	194	39	19414	7.69786	1	0.294793	0.270084
GOTERM_BP_DIRECT	GO:0051597~response to methylmercury	2	1.02564	0.0581921	ALAD, ARG1	194	6	19414	33.3574	1	0.294793	0.270084
GOTERM_BP_DIRECT	GO:0071373~cellular response to luteinizing hormone stimulus	2	1.02564	0.0581921	EDNRA, PLAT	194	6	19414	33.3574	1	0.294793	0.270084
GOTERM_BP_DIRECT	GO:0036324~vascular endothelial growth factor receptor-2 signaling pathway	2	1.02564	0.0581921	KDR, VEGFA	194	6	19414	33.3574	1	0.294793	0.270084
GOTERM_BP_DIRECT	GO:0010891~negative regulation of sequestering of triglyceride	2	1.02564	0.0581921	PPARG, PPARA	194	6	19414	33.3574	1	0.294793	0.270084
GOTERM_BP_DIRECT	GO:0002327~immature B cell differentiation	2	1.02564	0.0581921	PRKDC, KIT	194	6	19414	33.3574	1	0.294793	0.270084
GOTERM_BP_DIRECT	GO:0014910~regulation of smooth muscle cell migration	2	1.02564	0.0581921	ACE, PLAU	194	6	19414	33.3574	1	0.294793	0.270084
GOTERM_BP_DIRECT	GO:0031284~positive regulation of guanylate cyclase activity	2	1.02564	0.0581921	NOS2, NOS3	194	6	19414	33.3574	1	0.294793	0.270084
GOTERM_BP_DIRECT	GO:0038027~apolipoprotein A-I-mediated signaling pathway	2	1.02564	0.0581921	ITGB3, RHOA	194	6	19414	33.3574	1	0.294793	0.270084
GOTERM_BP_DIRECT	GO:1902751~positive regulation of cell cycle G2/M phase transition	2	1.02564	0.0581921	CDC25C, CDC25B	194	6	19414	33.3574	1	0.294793	0.270084
GOTERM_BP_DIRECT	GO:0046483~heterocycle metabolic process	2	1.02564	0.0581921	CYP2C19, CYP3A4	194	6	19414	33.3574	1	0.294793	0.270084
GOTERM_BP_DIRECT	GO:0043504~mitochondrial DNA repair	2	1.02564	0.0581921	PARP1, TP53	194	6	19414	33.3574	1	0.294793	0.270084
GOTERM_BP_DIRECT	GO:0070995~NADPH oxidation	2	1.02564	0.0581921	NQO1, PRDX5	194	6	19414	33.3574	1	0.294793	0.270084
GOTERM_BP_DIRECT	GO:0032376~positive regulation of cholesterol transport	2	1.02564	0.0581921	NR1H2, NR1H3	194	6	19414	33.3574	1	0.294793	0.270084
GOTERM_BP_DIRECT	GO:0003100~regulation of systemic arterial blood pressure by endothelin	2	1.02564	0.0581921	NOS3, RHOA	194	6	19414	33.3574	1	0.294793	0.270084
GOTERM_BP_DIRECT	GO:0051573~negative regulation of histone H3-K9 methylation	2	1.02564	0.0581921	DNMT1, DNMT3B	194	6	19414	33.3574	1	0.294793	0.270084
GOTERM_BP_DIRECT	GO:1903169~regulation of calcium ion transmembrane transport	2	1.02564	0.0581921	PTPN22, PIK3CG	194	6	19414	33.3574	1	0.294793	0.270084
GOTERM_BP_DIRECT	GO:0046651~lymphocyte proliferation	2	1.02564	0.0581921	FLT3, HPRT1	194	6	19414	33.3574	1	0.294793	0.270084
GOTERM_BP_DIRECT	GO:0032269~negative regulation of cellular protein metabolic process	2	1.02564	0.0581921	EDNRB, MIF	194	6	19414	33.3574	1	0.294793	0.270084
GOTERM_BP_DIRECT	GO:0071677~positive regulation of mononuclear cell migration	2	1.02564	0.0581921	LGALS3, TNF	194	6	19414	33.3574	1	0.294793	0.270084
GOTERM_BP_DIRECT	GO:0043619~regulation of transcription from RNA polymerase II promoter in response to oxidative stress	2	1.02564	0.0581921	HMOX1, HIF1A	194	6	19414	33.3574	1	0.294793	0.270084
GOTERM_BP_DIRECT	GO:0002320~lymphoid progenitor cell differentiation	2	1.02564	0.0581921	KIT, BCL2	194	6	19414	33.3574	1	0.294793	0.270084
GOTERM_BP_DIRECT	GO:0043605~cellular amide catabolic process	2	1.02564	0.0581921	XDH, ADA	194	6	19414	33.3574	1	0.294793	0.270084
GOTERM_BP_DIRECT	GO:0090324~negative regulation of oxidative phosphorylation	2	1.02564	0.0581921	TNF, RHOA	194	6	19414	33.3574	1	0.294793	0.270084
GOTERM_BP_DIRECT	GO:0071638~negative regulation of monocyte chemotactic protein-1 production	2	1.02564	0.0581921	GSTP1, NR1H4	194	6	19414	33.3574	1	0.294793	0.270084
GOTERM_BP_DIRECT	GO:0006816~calcium ion transport	4	2.05128	0.0590552	VDR, NOS3, CCL5, ITPR1	194	89	19414	4.49763	1	0.298648	0.273616
GOTERM_BP_DIRECT	GO:0046627~negative regulation of insulin receptor signaling pathway	3	1.53846	0.0599448	PTPN1, IL1B, PRKCD	194	40	19414	7.50541	1	0.301063	0.275828
GOTERM_BP_DIRECT	GO:0071392~cellular response to estradiol stimulus	3	1.53846	0.0599448	MMP2, ESR1, EGFR	194	40	19414	7.50541	1	0.301063	0.275828
GOTERM_BP_DIRECT	GO:0008625~extrinsic apoptotic signaling pathway via death domain receptors	3	1.53846	0.0599448	CASP8, BCL2, TNF	194	40	19414	7.50541	1	0.301063	0.275828
GOTERM_BP_DIRECT	GO:0048286~lung alveolus development	3	1.53846	0.0599448	ACE, KDR, ADA	194	40	19414	7.50541	1	0.301063	0.275828
GOTERM_BP_DIRECT	GO:0006955~immune response	10	5.12821	0.0609048	PNP, CCL5, IL1B, CXCR2, JAK2, TNF, IL2, LTB4R, PIK3CG, CCR2	194	497	19414	2.01352	1	0.30536	0.279765
GOTERM_BP_DIRECT	GO:0032467~positive regulation of cytokinesis	3	1.53846	0.0626182	CDC42, RHOA, CDC25B	194	41	19414	7.32235	1	0.313413	0.287143
GOTERM_BP_DIRECT	GO:0001701~in utero embryonic development	6	3.07692	0.0628469	EDNRA, NOS3, TP53, TGFBR1, TGFBR2, VEGFA	194	214	19414	2.80576	1	0.313652	0.287362
GOTERM_BP_DIRECT	GO:0008360~regulation of cell shape	5	2.5641	0.0628806	KIT, KDR, F2, RHOA, VEGFA	194	150	19414	3.33574	1	0.313652	0.287362
GOTERM_BP_DIRECT	GO:0006470~protein dephosphorylation	5	2.5641	0.0640553	PTPN1, BCL2, PTPN22, CDC25C, CDC25B	194	151	19414	3.31365	1	0.318967	0.292232
GOTERM_BP_DIRECT	GO:0050790~regulation of catalytic activity	3	1.53846	0.0653314	PARP1, SOD2, HIF1A	194	42	19414	7.14801	1	0.321614	0.294657
GOTERM_BP_DIRECT	GO:0032088~negative regulation of NF-kappaB transcription factor activity	4	2.05128	0.0656041	ADORA3, LRRK2, CAT, NR1H4	194	93	19414	4.30418	1	0.321614	0.294657
GOTERM_BP_DIRECT	GO:0007265~Ras protein signal transduction	4	2.05128	0.0656041	DNMT1, JUN, IGF1, TP53	194	93	19414	4.30418	1	0.321614	0.294657
GOTERM_BP_DIRECT	GO:0030641~regulation of cellular pH	2	1.02564	0.0675577	MAPK1, MAPK3	194	7	19414	28.592	1	0.321614	0.294657
GOTERM_BP_DIRECT	GO:0031394~positive regulation of prostaglandin biosynthetic process	2	1.02564	0.0675577	IL1B, PTGS2	194	7	19414	28.592	1	0.321614	0.294657
GOTERM_BP_DIRECT	GO:0051173~positive regulation of nitrogen compound metabolic process	2	1.02564	0.0675577	TNF, TGFBR1	194	7	19414	28.592	1	0.321614	0.294657
GOTERM_BP_DIRECT	GO:0032364~oxygen homeostasis	2	1.02564	0.0675577	SOD2, HIF1A	194	7	19414	28.592	1	0.321614	0.294657
GOTERM_BP_DIRECT	GO:0003253~cardiac neural crest cell migration involved in outflow tract morphogenesis	2	1.02564	0.0675577	CDC42, EDNRA	194	7	19414	28.592	1	0.321614	0.294657
GOTERM_BP_DIRECT	GO:0051647~nucleus localization	2	1.02564	0.0675577	CDK9, MTOR	194	7	19414	28.592	1	0.321614	0.294657
GOTERM_BP_DIRECT	GO:0006207~'de novo' pyrimidine nucleobase biosynthetic process	2	1.02564	0.0675577	MTOR, DHODH	194	7	19414	28.592	1	0.321614	0.294657
GOTERM_BP_DIRECT	GO:1902512~positive regulation of apoptotic DNA fragmentation	2	1.02564	0.0675577	IL6, CASP3	194	7	19414	28.592	1	0.321614	0.294657
GOTERM_BP_DIRECT	GO:0036498~IRE1-mediated unfolded protein response	2	1.02564	0.0675577	ERN1, PTPN1	194	7	19414	28.592	1	0.321614	0.294657
GOTERM_BP_DIRECT	GO:0002933~lipid hydroxylation	2	1.02564	0.0675577	CYP2C8, CYP3A4	194	7	19414	28.592	1	0.321614	0.294657
GOTERM_BP_DIRECT	GO:0048584~positive regulation of response to stimulus	2	1.02564	0.0675577	FLT3, KIT	194	7	19414	28.592	1	0.321614	0.294657
GOTERM_BP_DIRECT	GO:0008211~glucocorticoid metabolic process	2	1.02564	0.0675577	SERPINA6, NR3C1	194	7	19414	28.592	1	0.321614	0.294657
GOTERM_BP_DIRECT	GO:1905460~negative regulation of vascular associated smooth muscle cell apoptotic process	2	1.02564	0.0675577	DNMT1, IGF1	194	7	19414	28.592	1	0.321614	0.294657
GOTERM_BP_DIRECT	GO:0006166~purine ribonucleoside salvage	2	1.02564	0.0675577	PNP, HPRT1	194	7	19414	28.592	1	0.321614	0.294657
GOTERM_BP_DIRECT	GO:1901727~positive regulation of histone deacetylase activity	2	1.02564	0.0675577	LRRK2, VEGFA	194	7	19414	28.592	1	0.321614	0.294657
GOTERM_BP_DIRECT	GO:1904037~positive regulation of epithelial cell apoptotic process	2	1.02564	0.0675577	HMOX1, JAK2	194	7	19414	28.592	1	0.321614	0.294657
GOTERM_BP_DIRECT	GO:0050882~voluntary musculoskeletal movement	2	1.02564	0.0675577	ITPR1, MTOR	194	7	19414	28.592	1	0.321614	0.294657
GOTERM_BP_DIRECT	GO:0002318~myeloid progenitor cell differentiation	2	1.02564	0.0675577	FLT3, KIT	194	7	19414	28.592	1	0.321614	0.294657
GOTERM_BP_DIRECT	GO:0002438~acute inflammatory response to antigenic stimulus	2	1.02564	0.0675577	CXCR2, OPRM1	194	7	19414	28.592	1	0.321614	0.294657
GOTERM_BP_DIRECT	GO:0007167~enzyme linked receptor protein signaling pathway	2	1.02564	0.0675577	ERBB2, JAK2	194	7	19414	28.592	1	0.321614	0.294657
GOTERM_BP_DIRECT	GO:0036336~dendritic cell migration	2	1.02564	0.0675577	CDC42, ALOX5	194	7	19414	28.592	1	0.321614	0.294657
GOTERM_BP_DIRECT	GO:0048312~intracellular distribution of mitochondria	2	1.02564	0.0675577	LRRK2, MAPT	194	7	19414	28.592	1	0.321614	0.294657
GOTERM_BP_DIRECT	GO:0036016~cellular response to interleukin-3	2	1.02564	0.0675577	GSK3B, JAK2	194	7	19414	28.592	1	0.321614	0.294657
GOTERM_BP_DIRECT	GO:0042045~epithelial fluid transport	2	1.02564	0.0675577	EDNRB, ITPR1	194	7	19414	28.592	1	0.321614	0.294657
GOTERM_BP_DIRECT	GO:0030217~T cell differentiation	3	1.53846	0.0680834	KIT, PTPN22, IL2	194	43	19414	6.98178	1	0.322019	0.295028
GOTERM_BP_DIRECT	GO:0007259~JAK-STAT cascade	3	1.53846	0.0680834	STAT1, JAK2, CCR2	194	43	19414	6.98178	1	0.322019	0.295028
GOTERM_BP_DIRECT	GO:0030316~osteoclast differentiation	3	1.53846	0.0680834	GLO1, MAPK14, TNF	194	43	19414	6.98178	1	0.322019	0.295028
GOTERM_BP_DIRECT	GO:0003007~heart morphogenesis	3	1.53846	0.0680834	INSR, MTOR, VEGFA	194	43	19414	6.98178	1	0.322019	0.295028
GOTERM_BP_DIRECT	GO:0032691~negative regulation of interleukin-1 beta production	3	1.53846	0.0708732	GSTP1, FFAR1, IGF1	194	44	19414	6.8231	1	0.334133	0.306127
GOTERM_BP_DIRECT	GO:0048863~stem cell differentiation	3	1.53846	0.0708732	KIT, MAPK14, ESR1	194	44	19414	6.8231	1	0.334133	0.306127
GOTERM_BP_DIRECT	GO:0006631~fatty acid metabolic process	4	2.05128	0.0724711	CPT1A, PPARG, PPARA, PPARD	194	97	19414	4.12669	1	0.341116	0.312524
GOTERM_BP_DIRECT	GO:0070498~interleukin-1-mediated signaling pathway	3	1.53846	0.0736997	IL1B, RELA, MAPK3	194	45	19414	6.67148	1	0.345231	0.316295
GOTERM_BP_DIRECT	GO:0009411~response to UV	3	1.53846	0.0736997	MAPK8, CASP3, CAT	194	45	19414	6.67148	1	0.345231	0.316295
GOTERM_BP_DIRECT	GO:0042100~B cell proliferation	3	1.53846	0.0736997	PRKCD, BCL2, ADA	194	45	19414	6.67148	1	0.345231	0.316295
GOTERM_BP_DIRECT	GO:0046330~positive regulation of JNK cascade	4	2.05128	0.0742363	CDC42, IL1B, TNF, MAP3K5	194	98	19414	4.08458	1	0.346634	0.31758
GOTERM_BP_DIRECT	GO:0032259~methylation	4	2.05128	0.0742363	DNMT1, DNMT3B, COMT, TYMS	194	98	19414	4.08458	1	0.346634	0.31758
GOTERM_BP_DIRECT	GO:0072089~stem cell proliferation	3	1.53846	0.0765619	ABCB1, KDR, TP53	194	46	19414	6.52645	1	0.34818	0.318996
GOTERM_BP_DIRECT	GO:0045071~negative regulation of viral genome replication	3	1.53846	0.0765619	CCL5, TNF, LTF	194	46	19414	6.52645	1	0.34818	0.318996
GOTERM_BP_DIRECT	GO:0022617~extracellular matrix disassembly	3	1.53846	0.0765619	MMP2, PLG, MMP9	194	46	19414	6.52645	1	0.34818	0.318996
GOTERM_BP_DIRECT	GO:0034329~cell junction assembly	2	1.02564	0.0768307	CDC42, RHOA	194	8	19414	25.018	1	0.34818	0.318996
GOTERM_BP_DIRECT	GO:0002686~negative regulation of leukocyte migration	2	1.02564	0.0768307	HMOX1, ADA	194	8	19414	25.018	1	0.34818	0.318996
GOTERM_BP_DIRECT	GO:0002674~negative regulation of acute inflammatory response	2	1.02564	0.0768307	GSTP1, PPARG	194	8	19414	25.018	1	0.34818	0.318996
GOTERM_BP_DIRECT	GO:0038134~ERBB2-EGFR signaling pathway	2	1.02564	0.0768307	ERBB2, EGFR	194	8	19414	25.018	1	0.34818	0.318996
GOTERM_BP_DIRECT	GO:0042473~outer ear morphogenesis	2	1.02564	0.0768307	MAPK1, MAPK3	194	8	19414	25.018	1	0.34818	0.318996
GOTERM_BP_DIRECT	GO:0090140~regulation of mitochondrial fission	2	1.02564	0.0768307	LRRK2, MAPT	194	8	19414	25.018	1	0.34818	0.318996
GOTERM_BP_DIRECT	GO:0010544~negative regulation of platelet activation	2	1.02564	0.0768307	NOS3, F2	194	8	19414	25.018	1	0.34818	0.318996
GOTERM_BP_DIRECT	GO:0061044~negative regulation of vascular wound healing	2	1.02564	0.0768307	ALOX5, TNF	194	8	19414	25.018	1	0.34818	0.318996
GOTERM_BP_DIRECT	GO:0010757~negative regulation of plasminogen activation	2	1.02564	0.0768307	PLAU, PLAT	194	8	19414	25.018	1	0.34818	0.318996
GOTERM_BP_DIRECT	GO:0051901~positive regulation of mitochondrial depolarization	2	1.02564	0.0768307	PARP1, KDR	194	8	19414	25.018	1	0.34818	0.318996
GOTERM_BP_DIRECT	GO:0048066~developmental pigmentation	2	1.02564	0.0768307	EDNRA, EDNRB	194	8	19414	25.018	1	0.34818	0.318996
GOTERM_BP_DIRECT	GO:0071316~cellular response to nicotine	2	1.02564	0.0768307	TNF, RELA	194	8	19414	25.018	1	0.34818	0.318996
GOTERM_BP_DIRECT	GO:0006975~DNA damage induced protein phosphorylation	2	1.02564	0.0768307	CHEK1, MAPK3	194	8	19414	25.018	1	0.34818	0.318996
GOTERM_BP_DIRECT	GO:0010883~regulation of lipid storage	2	1.02564	0.0768307	CPT1A, PPARA	194	8	19414	25.018	1	0.34818	0.318996
GOTERM_BP_DIRECT	GO:0006584~catecholamine metabolic process	2	1.02564	0.0768307	SULT1A1, COMT	194	8	19414	25.018	1	0.34818	0.318996
GOTERM_BP_DIRECT	GO:0010742~macrophage derived foam cell differentiation	2	1.02564	0.0768307	STAT1, PPARG	194	8	19414	25.018	1	0.34818	0.318996
GOTERM_BP_DIRECT	GO:0001755~neural crest cell migration	3	1.53846	0.0794589	RET, EDNRB, HIF1A	194	47	19414	6.38758	1	0.358977	0.328889
GOTERM_BP_DIRECT	GO:0006091~generation of precursor metabolites and energy	3	1.53846	0.0794589	ADRB3, FECH, PPARD	194	47	19414	6.38758	1	0.358977	0.328889
GOTERM_BP_DIRECT	GO:0030512~negative regulation of transforming growth factor beta receptor signaling pathway	4	2.05128	0.0796456	HSPA5, PPARG, PPARA, TP53	194	101	19414	3.96325	1	0.359235	0.329124
GOTERM_BP_DIRECT	GO:0007267~cell-cell signaling	6	3.07692	0.0797617	CCL5, IL1B, MAPT, S100A9, IL2, FADS1	194	230	19414	2.61058	1	0.359235	0.329124
GOTERM_BP_DIRECT	GO:0001568~blood vessel development	3	1.53846	0.0823897	MDM2, AHR, TGFBR2	194	48	19414	6.25451	1	0.369363	0.338404
GOTERM_BP_DIRECT	GO:0008542~visual learning	3	1.53846	0.0823897	KIT, HMGCR, HIF1A	194	48	19414	6.25451	1	0.369363	0.338404
GOTERM_BP_DIRECT	GO:0050673~epithelial cell proliferation	3	1.53846	0.0823897	KIT, KDR, EGFR	194	48	19414	6.25451	1	0.369363	0.338404
GOTERM_BP_DIRECT	GO:0032755~positive regulation of interleukin-6 production	4	2.05128	0.0833447	IL6, NOS2, IL1B, TNF	194	103	19414	3.8863	1	0.371363	0.340237
GOTERM_BP_DIRECT	GO:0051781~positive regulation of cell division	3	1.53846	0.0853532	IL1B, CAT, VEGFA	194	49	19414	6.12687	1	0.371363	0.340237
GOTERM_BP_DIRECT	GO:0035726~common myeloid progenitor cell proliferation	2	1.02564	0.086012	FLT3, GSTP1	194	9	19414	22.2383	1	0.371363	0.340237
GOTERM_BP_DIRECT	GO:0060316~positive regulation of ryanodine-sensitive calcium-release channel activity	2	1.02564	0.086012	GSTM2, GSTO1	194	9	19414	22.2383	1	0.371363	0.340237
GOTERM_BP_DIRECT	GO:0045792~negative regulation of cell size	2	1.02564	0.086012	RHOA, MTOR	194	9	19414	22.2383	1	0.371363	0.340237
GOTERM_BP_DIRECT	GO:0002314~germinal center B cell differentiation	2	1.02564	0.086012	IL6, ADA	194	9	19414	22.2383	1	0.371363	0.340237
GOTERM_BP_DIRECT	GO:0009743~response to carbohydrate	2	1.02564	0.086012	NQO1, IL1B	194	9	19414	22.2383	1	0.371363	0.340237
GOTERM_BP_DIRECT	GO:0051248~negative regulation of protein metabolic process	2	1.02564	0.086012	EDNRB, MIF	194	9	19414	22.2383	1	0.371363	0.340237
GOTERM_BP_DIRECT	GO:1903140~regulation of establishment of endothelial barrier	2	1.02564	0.086012	IL1B, TNF	194	9	19414	22.2383	1	0.371363	0.340237
GOTERM_BP_DIRECT	GO:0060385~axonogenesis involved in innervation	2	1.02564	0.086012	EDNRA, ITGA4	194	9	19414	22.2383	1	0.371363	0.340237
GOTERM_BP_DIRECT	GO:0050999~regulation of nitric-oxide synthase activity	2	1.02564	0.086012	IL1B, EGFR	194	9	19414	22.2383	1	0.371363	0.340237
GOTERM_BP_DIRECT	GO:0045822~negative regulation of heart contraction	2	1.02564	0.086012	JAK2, IL2	194	9	19414	22.2383	1	0.371363	0.340237
GOTERM_BP_DIRECT	GO:0032886~regulation of microtubule-based process	2	1.02564	0.086012	GSK3B, ERBB2	194	9	19414	22.2383	1	0.371363	0.340237
GOTERM_BP_DIRECT	GO:0071287~cellular response to manganese ion	2	1.02564	0.086012	HSPA5, LRRK2	194	9	19414	22.2383	1	0.371363	0.340237
GOTERM_BP_DIRECT	GO:2000641~regulation of early endosome to late endosome transport	2	1.02564	0.086012	MAPK1, MAPK3	194	9	19414	22.2383	1	0.371363	0.340237
GOTERM_BP_DIRECT	GO:0061042~vascular wound healing	2	1.02564	0.086012	KDR, VEGFA	194	9	19414	22.2383	1	0.371363	0.340237
GOTERM_BP_DIRECT	GO:0001542~ovulation from ovarian follicle	2	1.02564	0.086012	NOS3, MMP2	194	9	19414	22.2383	1	0.371363	0.340237
GOTERM_BP_DIRECT	GO:0010224~response to UV-B	2	1.02564	0.086012	BCL2, RELA	194	9	19414	22.2383	1	0.371363	0.340237
GOTERM_BP_DIRECT	GO:0050805~negative regulation of synaptic transmission	2	1.02564	0.086012	BCHE, IL1B	194	9	19414	22.2383	1	0.371363	0.340237
GOTERM_BP_DIRECT	GO:0099527~postsynapse to nucleus signaling pathway	2	1.02564	0.086012	JAK2, RELA	194	9	19414	22.2383	1	0.371363	0.340237
GOTERM_BP_DIRECT	GO:0060982~coronary artery morphogenesis	2	1.02564	0.086012	TGFBR1, VEGFA	194	9	19414	22.2383	1	0.371363	0.340237
GOTERM_BP_DIRECT	GO:0021795~cerebral cortex cell migration	2	1.02564	0.086012	RHOA, EGFR	194	9	19414	22.2383	1	0.371363	0.340237
GOTERM_BP_DIRECT	GO:0071243~cellular response to arsenic-containing substance	2	1.02564	0.086012	GSTO1, HMOX1	194	9	19414	22.2383	1	0.371363	0.340237
GOTERM_BP_DIRECT	GO:0008354~germ cell migration	2	1.02564	0.086012	KIT, TGFBR1	194	9	19414	22.2383	1	0.371363	0.340237
GOTERM_BP_DIRECT	GO:0048771~tissue remodeling	2	1.02564	0.086012	MMP2, PLG	194	9	19414	22.2383	1	0.371363	0.340237
GOTERM_BP_DIRECT	GO:0010862~positive regulation of pathway-restricted SMAD protein phosphorylation	3	1.53846	0.0883487	PPARG, TGFBR1, TGFBR2	194	50	19414	6.00433	1	0.38089	0.348965
GOTERM_BP_DIRECT	GO:0043280~positive regulation of cysteine-type endopeptidase activity involved in apoptotic process	3	1.53846	0.0913752	TNF, RHOA, MAP3K5	194	51	19414	5.8866	1	0.392202	0.359329
GOTERM_BP_DIRECT	GO:0030968~endoplasmic reticulum unfolded protein response	3	1.53846	0.0913752	ERN1, PTPN1, HSPA5	194	51	19414	5.8866	1	0.392202	0.359329
GOTERM_BP_DIRECT	GO:0031623~receptor internalization	3	1.53846	0.0913752	ACHE, INSR, CXCR2	194	51	19414	5.8866	1	0.392202	0.359329
GOTERM_BP_DIRECT	GO:0061844~antimicrobial humoral immune response mediated by antimicrobial peptide	4	2.05128	0.0948718	LGALS3, F2, S100A9, LTF	194	109	19414	3.67237	1	0.394864	0.361767
GOTERM_BP_DIRECT	GO:0033033~negative regulation of myeloid cell apoptotic process	2	1.02564	0.0951024	BCL2, MIF	194	10	19414	20.0144	1	0.394864	0.361767
GOTERM_BP_DIRECT	GO:2000048~negative regulation of cell-cell adhesion mediated by cadherin	2	1.02564	0.0951024	PLG, VEGFA	194	10	19414	20.0144	1	0.394864	0.361767
GOTERM_BP_DIRECT	GO:0086100~endothelin receptor signaling pathway	2	1.02564	0.0951024	EDNRA, EDNRB	194	10	19414	20.0144	1	0.394864	0.361767
GOTERM_BP_DIRECT	GO:0042359~vitamin D metabolic process	2	1.02564	0.0951024	CYP3A4, GC	194	10	19414	20.0144	1	0.394864	0.361767
GOTERM_BP_DIRECT	GO:0070294~renal sodium ion absorption	2	1.02564	0.0951024	EDNRA, EDNRB	194	10	19414	20.0144	1	0.394864	0.361767
GOTERM_BP_DIRECT	GO:1905461~positive regulation of vascular associated smooth muscle cell apoptotic process	2	1.02564	0.0951024	PPARG, SOD2	194	10	19414	20.0144	1	0.394864	0.361767
GOTERM_BP_DIRECT	GO:2000343~positive regulation of chemokine (C-X-C motif) ligand 2 production	2	1.02564	0.0951024	MIF, TNF	194	10	19414	20.0144	1	0.394864	0.361767
GOTERM_BP_DIRECT	GO:1901522~positive regulation of transcription from RNA polymerase II promoter involved in cellular response to chemical stimulus	2	1.02564	0.0951024	JUN, RELA	194	10	19414	20.0144	1	0.394864	0.361767
GOTERM_BP_DIRECT	GO:0060068~vagina development	2	1.02564	0.0951024	RBP4, ESR1	194	10	19414	20.0144	1	0.394864	0.361767
GOTERM_BP_DIRECT	GO:0070233~negative regulation of T cell apoptotic process	2	1.02564	0.0951024	CCL5, BCL2	194	10	19414	20.0144	1	0.394864	0.361767
GOTERM_BP_DIRECT	GO:0031639~plasminogen activation	2	1.02564	0.0951024	PLAU, PLAT	194	10	19414	20.0144	1	0.394864	0.361767
GOTERM_BP_DIRECT	GO:0070244~negative regulation of thymocyte apoptotic process	2	1.02564	0.0951024	HIF1A, ADA	194	10	19414	20.0144	1	0.394864	0.361767
GOTERM_BP_DIRECT	GO:0072112~glomerular visceral epithelial cell differentiation	2	1.02564	0.0951024	EDNRA, EDNRB	194	10	19414	20.0144	1	0.394864	0.361767
GOTERM_BP_DIRECT	GO:0051093~negative regulation of developmental process	2	1.02564	0.0951024	GSK3B, KIT	194	10	19414	20.0144	1	0.394864	0.361767
GOTERM_BP_DIRECT	GO:0051272~positive regulation of cellular component movement	2	1.02564	0.0951024	TGFBR1, VEGFA	194	10	19414	20.0144	1	0.394864	0.361767
GOTERM_BP_DIRECT	GO:0097152~mesenchymal cell apoptotic process	2	1.02564	0.0951024	EDNRA, HIF1A	194	10	19414	20.0144	1	0.394864	0.361767
GOTERM_BP_DIRECT	GO:0051593~response to folic acid	2	1.02564	0.0951024	BCHE, TYMS	194	10	19414	20.0144	1	0.394864	0.361767
GOTERM_BP_DIRECT	GO:1904179~positive regulation of adipose tissue development	2	1.02564	0.0951024	NR1H4, PPARG	194	10	19414	20.0144	1	0.394864	0.361767
GOTERM_BP_DIRECT	GO:0051006~positive regulation of lipoprotein lipase activity	2	1.02564	0.0951024	NR1H2, NR1H3	194	10	19414	20.0144	1	0.394864	0.361767
GOTERM_BP_DIRECT	GO:0070723~response to cholesterol	2	1.02564	0.0951024	TGFBR1, TGFBR2	194	10	19414	20.0144	1	0.394864	0.361767
GOTERM_BP_DIRECT	GO:0050665~hydrogen peroxide biosynthetic process	2	1.02564	0.0951024	MAOB, SOD2	194	10	19414	20.0144	1	0.394864	0.361767
GOTERM_BP_DIRECT	GO:0060397~JAK-STAT cascade involved in growth hormone signaling pathway	2	1.02564	0.0951024	PTPN1, JAK2	194	10	19414	20.0144	1	0.394864	0.361767
GOTERM_BP_DIRECT	GO:0005975~carbohydrate metabolic process	5	2.5641	0.0973618	GSK3B, ADRB3, GLO1, INSR, PYGL	194	175	19414	2.8592	1	0.403672	0.369837
GOTERM_BP_DIRECT	GO:0006968~cellular defense response	3	1.53846	0.0975175	CXCR2, RELA, CCR2	194	53	19414	5.66446	1	0.403745	0.369904
GOTERM_BP_DIRECT	GO:0007229~integrin-mediated signaling pathway	4	2.05128	0.0988524	CDC42, ITGA4, ITGB3, NME2	194	111	19414	3.6062	1	0.408693	0.374437
