# Supplementary material for: Potential Hepatoprotective Effects of Chamaecyparis lawsoniana against Methotrexate-Induced Liver Injury: Integrated Phytochemical Profiling, Target Network Analysis, and Experimental Validation
Source: Antioxidants (Basel). 2023 Dec 14;12(12):2118. doi: 10.3390/antiox12122118 (PMC10740566; doi:10.3390/antiox12122118)
Supplement: Supplementary file 1 [file antioxidants-12-02118-s001.zip › Table S9.xlsx]

## Sheet: CC
Category	Term	Count	%	PValue	Genes	List Total	Pop Hits	Pop Total	Fold Enrichment	Bonferroni	Benjamini	FDR	Negative log10 PValue
GOTERM_CC_DIRECT	GO:0005829~cytosol	110	56.4103	7.85697e-18	AHR, COMT, NR3C1, LGALS3, PNP, AKT2, FPGS, CHEK1, GLUL, MAP3K5, GSTK1, G6PD, PRKCD, MIF, CDC25C, CDC25B, SULT2B1, LAP3, HPRT1, S100A9, TP53, CFTR, CES1, MAOA, PRKDC, GLO1, HIF1A, SULT1A1, PRDX5, TERT, HMOX1, HAO2, MCL1, GSTM2, GSTM1, HSPA5, VDR, EPHX2, ESR1, DHFR, CDK4, PAH, BCL2, MDM2, CDK1, KYAT1, ADA, GSK3B, FLT3, LRRK2, PTPN22, PYGL, PIK3CG, ALAD, CASP8, CA3, CASP3, CASP2, JAK2, CCR2, HSP90AA…	195	5593	20624	2.08011	2.63994e-15	2.63994e-15	2.33352e-15	17.1047
GOTERM_CC_DIRECT	GO:0070062~extracellular exosome	65	33.3333	4.12677e-17	ALK, SERPINA1, LRRK2, ITGB3, PLAT, PYGL, COMT, SERPINA6, MPO, ALAD, LGALS3, PNP, PLAU, ANPEP, GLUL, GSTK1, ABCC1, G6PD, HSP90AA1, ITGA4, GSTO1, ANXA5, PRKCD, AKR1A1, NME2, SORD, MIF, F2, MMP9, RHOA, SULT2B1, RBP4, F9, CAT, BLVRB, HPRT1, LAP3, TKT, S100A9, CES2, LTF, ABCB1, GSTP1, GLO1, PLG, CRYZ, CDC42, PRDX5, TTR, GC, GSTM2, ACE, HSPA5, EPHX2, INSR, GSS, GSR, SOD2, FABP1, FABP4, ALB, GSTA1, CDK1…	195	2219	20624	3.09809	1.38659e-14	6.93297e-15	6.12825e-15	16.3844
GOTERM_CC_DIRECT	GO:0032991~macromolecular complex	31	15.8974	2.10591e-12	ALK, PRKDC, ITGB3, AHR, NR3C1, PTGS2, HIF1A, TNF, EGFR, CDC42, CASP8, TTR, AKT2, CHEK1, GLUL, MAP3K5, PTPN1, HSP90AA1, PARP1, HSPA5, STAT1, ESR1, FABP1, F9, CAT, ALB, BCL2, MDM2, TP53, CFTR, LTF	195	685	20624	4.7864	7.07573e-10	2.35862e-10	2.08485e-10	11.6766
GOTERM_CC_DIRECT	GO:0043235~receptor complex	17	8.71795	3.10757e-10	ALK, RET, FLT1, FLT3, VDR, ITGB3, INSR, NR1H4, NR1H3, EGFR, TGFBR1, TGFBR2, ADRB3, KIT, ERBB2, KDR, PPARG	195	220	20624	8.17268	1.04414e-07	2.61036e-08	2.30737e-08	9.50758
GOTERM_CC_DIRECT	GO:0005615~extracellular space	48	24.6154	1.57485e-09	ACHE, SERPINA1, FLT1, GSTP1, LRRK2, PLAT, PLG, SERPINA6, MPO, TNF, EGFR, ALAD, LGALS3, PRDX5, TTR, PLAU, CCL5, ANPEP, ALOX5, CHEK1, HMOX1, GC, XDH, BCHE, ACE, ARG1, MMP2, AKR1A1, SORD, IGF1, MIF, F2, SELE, MMP9, F3, IL2, VEGFA, IL6, RBP4, F9, SELL, IL1B, CAT, ALB, KIT, LCN2, S100A9, LTF	195	1970	20624	2.57699	5.2915e-07	1.0583e-07	9.35462e-08	8.80276
GOTERM_CC_DIRECT	GO:1904813~ficolin-1-rich granule lumen	13	6.66667	2.16723e-09	HSP90AA1, SERPINA1, GSTP1, NME2, PYGL, MIF, MAPK14, MMP9, ALAD, PNP, ALOX5, CAT, MAPK1	195	124	20624	11.0882	7.2819e-07	1.21365e-07	1.07278e-07	8.66409
GOTERM_CC_DIRECT	GO:0005737~cytoplasm	92	47.1795	6.51373e-09	GSK3B, LRRK2, PTPN22, PLAT, AHR, PYGL, NR3C1, PIK3CG, LGALS3, CASP8, PNP, CA3, ANPEP, CASP3, HNF4A, FPGS, CHEK1, CASP2, JAK2, GLUL, CCR2, MAP3K5, G6PD, HSP90AA1, PARP1, GSTO1, ARG1, ANXA5, PRKCD, NME2, MIF, CDC25C, CDC25B, ERN1, SULT2B1, CAT, PPARG, MAPT, HPRT1, LAP3, S100A9, TP53, CFTR, CES1, LTF, ABCB1, GSTP1, GLO1, NR1I3, ODC1, TYMS, CYP2C19, CYP3A4, PTGS2, HIF1A, EGFR, RELA, SULT1A1, CDC42, M…	195	5687	20624	1.71097	2.18861e-06	3.12659e-07	2.76368e-07	8.18617
GOTERM_CC_DIRECT	GO:0005739~mitochondrion	38	19.4872	2.62187e-08	GSK3B, MAOB, FECH, MAOA, GSTP1, LRRK2, TYMS, NR3C1, MAPK8, PRDX5, CASP8, FPGS, CASP2, MAPK1, GLUL, FADS1, MCL1, MAPK3, GSTK1, CPT1A, HSP90AA1, PARP1, HSPA5, MMP2, PRKCD, GSR, MAPK14, SOD2, DHODH, ERN1, DHFR, CAT, BCL2, CDK1, NOX4, KYAT1, MAPT, TP53	195	1458	20624	2.75654	8.80944e-06	1.10119e-06	9.73369e-07	7.58139
GOTERM_CC_DIRECT	GO:0045121~membrane raft	15	7.69231	8.77606e-08	RET, LRRK2, OPRM1, SELE, TNF, EGFR, TGFBR1, TGFBR2, CASP8, EDNRB, CASP3, KDR, MAPT, JAK2, ABCG2	195	245	20624	6.47535	2.94871e-05	3.2764e-06	2.8961e-06	7.0567
GOTERM_CC_DIRECT	GO:0005576~extracellular region	47	24.1026	1.12743e-07	ACHE, SERPINA1, GSTP1, PLAT, PLG, PYGL, SERPINA6, MPO, TNF, ALAD, LGALS3, TTR, PNP, PLAU, CCL5, ALOX5, KDR, MAPK1, GC, BCHE, ST6GAL1, HSP90AA1, ACE, ARG1, MMP2, PRKCD, ANXA5, NME2, IGF1, MIF, MAPK14, F2, MMP9, IL2, TGFBR2, VEGFA, IL6, RBP4, F9, IL1B, CAT, ALB, LCN2, MAPT, SHBG, S100A9, LTF	195	2184	20624	2.27606	3.78809e-05	3.78816e-06	3.34846e-06	6.94791
GOTERM_CC_DIRECT	GO:0009897~external side of plasma membrane	20	10.2564	1.35328e-07	ACE, ITGA4, ITGB3, INSR, ANXA5, GSR, PLG, F2, SELE, F3, TNF, TGFBR2, SELL, ANPEP, KIT, CXCR2, KDR, ADA, CCR2, MAP3K5	195	477	20624	4.43455	4.54693e-05	3.81369e-06	3.37103e-06	6.86861
GOTERM_CC_DIRECT	GO:0034774~secretory granule lumen	11	5.64103	1.36203e-07	ALAD, HSP90AA1, PNP, ALOX5, GSTP1, CAT, NME2, MIF, PYGL, MAPK14, S100A9	195	115	20624	10.1166	4.57633e-05	3.81369e-06	3.37103e-06	6.86581
GOTERM_CC_DIRECT	GO:0005654~nucleoplasm	69	35.3846	2.70477e-07	GSK3B, EHMT2, ITGB3, AHR, NR3C1, MPO, LGALS3, CASP8, CASP3, AKT2, HNF4A, CHEK1, DNMT3B, JAK2, HSP90AA1, PARP1, GSTO1, PRKCD, MIF, CDC25C, CDC25B, BLVRB, PPARG, TOP1, LAP3, TKT, PPARA, S100A9, TP53, ABCG2, PPARD, DNMT1, ABCB1, ADH1C, PRKDC, ADH1B, GLO1, NR1I3, ADH1A, NR1I2, HIF1A, RELA, MAPK8, TERT, ALOX5, ERBB2, CXCR2, HMOX1, MAPK1, MCL1, MAPK3, JUN, NOS2, STAT1, VDR, NR1H2, NR1H4, NR1H3, MAPK14,…	195	4031	20624	1.8104	9.08762e-05	6.99079e-06	6.17936e-06	6.56787
GOTERM_CC_DIRECT	GO:0005901~caveola	9	4.61538	5.22197e-07	NOS3, INSR, HMOX1, MAPK1, JAK2, PTGS2, SELE, TGFBR2, MAPK3	195	75	20624	12.6917	0.000175443	1.25327e-05	1.1078e-05	6.28217
GOTERM_CC_DIRECT	GO:0005886~plasma membrane	81	41.5385	1.96967e-06	RET, ALK, ACHE, GSK3B, FLT1, FLT3, LRRK2, ITGB3, HTR2C, COMT, TNF, PIK3CG, LTB4R, LGALS3, EDNRA, EDNRB, PLAU, ADORA3, ANPEP, AKT2, KDR, FFAR1, JAK2, GLUL, CCR2, ABCC1, HSP90AA1, ITGA4, MMP2, PRKCD, TACR2, MIF, OPRM1, F2, F3, RHOA, TGFBR1, TGFBR2, F9, ADRB3, CAT, KIT, BLVRB, MAPT, S100A9, CFTR, ABCG2, LTF, ABCB1, ADH1C, ADH1B, GLO1, ADH1A, ITPR1, PLG, CYP2C19, EGFR, CDC42, TERT, TBXA2R, ERBB2, CXC…	195	5333	20624	1.60639	0.000661592	4.41207e-05	3.89995e-05	5.70561
GOTERM_CC_DIRECT	GO:0005782~peroxisomal matrix	7	3.58974	9.10811e-06	FABP1, GSTK1, PRDX5, NOS2, EPHX2, CAT, HAO2	195	52	20624	14.2375	0.00305566	0.00019127	0.000169069	5.04057
GOTERM_CC_DIRECT	GO:0005925~focal adhesion	16	8.20513	1.3779e-05	FLT1, HSPA5, ITGA4, ITGB3, ANXA5, OPRM1, RHOA, EGFR, CDC42, PLAU, CAT, NOX4, MAPK1, LAP3, JAK2, MAPK3	195	428	20624	3.9538	0.00461906	0.000263588	0.000232993	4.86078
GOTERM_CC_DIRECT	GO:0009986~cell surface	20	10.2564	1.41208e-05	ACHE, HSP90AA1, ABCB1, HSPA5, ITGA4, ITGB3, PLAT, PLG, MIF, F3, TNF, EGFR, TGFBR1, VEGFA, LGALS3, PLAU, CXCR2, ADA, CFTR, LTF	195	654	20624	3.23438	0.00473338	0.000263588	0.000232993	4.85014
GOTERM_CC_DIRECT	GO:0005788~endoplasmic reticulum lumen	13	6.66667	3.59388e-05	BCHE, SERPINA1, HSPA5, FLT3, F2, PTGS2, IL6, F9, ALB, MAPK1, CES2, CES1, MAPK3	195	307	20624	4.47861	0.012003	0.000635549	0.00056178	4.44444
GOTERM_CC_DIRECT	GO:0005887~integral component of plasma membrane	30	15.3846	8.0701e-05	RET, ALK, FLT1, FLT3, ITGB3, HTR2C, TNF, LTB4R, EGFR, EDNRA, EDNRB, TBXA2R, ADORA3, ERBB2, CXCR2, KDR, FFAR1, SLC19A1, CCR2, ABCC1, INSR, TACR2, OPRM1, SELE, F3, TGFBR2, SELL, ADRB3, KIT, CFTR	195	1438	20624	2.20648	0.0267523	0.00135578	0.00119841	4.09312
GOTERM_CC_DIRECT	GO:0005777~peroxisome	8	4.10256	8.70393e-05	GSTK1, PRDX5, NOS2, EPHX2, CAT, TKT, XDH, HAO2	195	111	20624	7.62264	0.028823	0.00139263	0.00123098	4.06028
GOTERM_CC_DIRECT	GO:0005789~endoplasmic reticulum membrane	25	12.8205	0.000128387	LRRK2, ITPR1, HMGCR, CYP2C19, CYP3A4, PTGS2, EGFR, CYP17A1, CDC42, HMOX1, FADS1, FDFT1, HSPA5, RHOA, MTOR, ERN1, CYP2C9, CYP2C8, BCL2, CDK1, NOX4, TKT, UGT2B7, CFTR, PTGES	195	1112	20624	2.37779	0.0422235	0.00196082	0.00173323	3.89148
GOTERM_CC_DIRECT	GO:0005741~mitochondrial outer membrane	10	5.12821	0.000150465	CPT1A, CASP8, MAOB, MAOA, ARG1, LRRK2, BCL2, HMOX1, MTOR, MCL1	195	206	20624	5.13418	0.0493032	0.0021981	0.00194296	3.82256
GOTERM_CC_DIRECT	GO:0048471~perinuclear region of cytoplasm	19	9.74359	0.000209576	ACHE, HSP90AA1, NOS2, STAT1, PRKCD, ITPR1, NME2, PTPN22, CDC25C, SELE, EGFR, PRDX5, ALOX5, ERBB2, NOX4, HMOX1, PPARG, PTGES, CCR2	195	735	20624	2.73404	0.0680024	0.00293407	0.00259351	3.67866
GOTERM_CC_DIRECT	GO:0005634~nucleus	81	41.5385	0.00022846	ACHE, GSK3B, FLT3, EHMT2, ITGB3, PTPN22, AHR, NR3C1, MPO, ALAD, LGALS3, PNP, CASP3, AKT2, HNF4A, CHEK1, KDR, DNMT3B, CASP2, JAK2, GLUL, G6PD, HSP90AA1, PARP1, ARG1, MMP2, PRKCD, NME2, CDC25C, RHOA, TGFBR1, CDC25B, SULT2B1, ADRB3, PPARG, MAPT, TOP1, LAP3, PPARA, S100A9, TP53, CFTR, LTF, PPARD, DNMT1, PRKDC, GSTP1, NR1I3, TYMS, HIF1A, EGFR, RELA, MAPK8, PRDX5, TERT, ERBB2, HMOX1, MAPK1, MCL1, MAPK3…	195	6033	20624	1.42001	0.0738984	0.0030705	0.0027141	3.64119
GOTERM_CC_DIRECT	GO:0005667~transcription factor complex	10	5.12821	0.00035178	JUN, PARP1, PRKDC, CDK4, NR1I2, AHR, HIF1A, ESR1, TP53, RELA	195	231	20624	4.57853	0.111498	0.00454608	0.00401841	3.45373
GOTERM_CC_DIRECT	GO:0000785~chromatin	23	11.7949	0.000389349	JUN, PARP1, STAT1, PRKDC, VDR, EHMT2, NR1H2, NR1I3, NR1I2, NR1H4, NR1H3, AHR, NR3C1, HIF1A, ESR1, RELA, CDK4, HNF4A, CHEK1, PPARG, PPARA, TP53, PPARD	195	1053	20624	2.31014	0.122648	0.00484523	0.00428284	3.40966
GOTERM_CC_DIRECT	GO:0043025~neuronal cell body	12	6.15385	0.000742386	CDC42, RET, NQO1, HSP90AA1, ITGA4, ARG1, CASP3, LRRK2, MAPT, TNF, CYP17A1, CCR2	195	367	20624	3.45823	0.220836	0.00890863	0.00787459	3.12937
GOTERM_CC_DIRECT	GO:0090575~RNA polymerase II transcription factor complex	7	3.58974	0.00109573	JUN, STAT1, VDR, NR1H2, NR1H3, PPARG, HIF1A	195	123	20624	6.0191	0.308137	0.0126954	0.0112218	2.9603
GOTERM_CC_DIRECT	GO:0043231~intracellular membrane-bounded organelle	21	10.7692	0.00125833	G6PD, SERPINA1, HSPA5, LRRK2, COMT, CYP3A4, CYP2C19, MPO, SULT2B1, CYP2C9, PRDX5, CYP2C8, MAPK8, AKT2, CAT, CHEK1, BLVRB, PPARG, UGT2B7, CES2, FADS1	195	1002	20624	2.21661	0.344963	0.0136812	0.0120932	2.90021
GOTERM_CC_DIRECT	GO:0005759~mitochondrial matrix	12	6.15385	0.00126226	GSTK1, PTPN1, PRDX5, FECH, LRRK2, FPGS, GSR, CDK1, TYMS, SOD2, NR3C1, TP53	195	392	20624	3.23768	0.345829	0.0136812	0.0120932	2.89885
GOTERM_CC_DIRECT	GO:0005783~endoplasmic reticulum	23	11.7949	0.00134256	PTPN1, ST6GAL1, SERPINA1, HSPA5, FLT3, LRRK2, PRKCD, ITPR1, HMGCR, OPRM1, PTGS2, CYP17A1, ERN1, SULT2B1, CAT, ALB, KDR, BCL2, HMOX1, TP53, CES2, CES1, FDFT1	195	1157	20624	2.10248	0.363266	0.0140969	0.0124606	2.87207
GOTERM_CC_DIRECT	GO:0016020~membrane	52	26.6667	0.00178386	RET, ACHE, LRRK2, COMT, NR3C1, TNF, PIK3CG, LGALS3, CASP2, JAK2, FADS1, CCR2, GSTK1, ABCC1, CPT1A, G6PD, HSP90AA1, PARP1, ITGA4, ANXA5, PRKCD, SORD, F3, TGFBR1, TGFBR2, F9, CAT, MAPT, CFTR, UGT2B7, PTGES, ABCB1, PRKDC, ITPR1, EGFR, CDC42, ERBB2, CXCR2, HMOX1, FDFT1, MCL1, ACE, HSPA5, INSR, ESR1, MTOR, VEGFA, CDK9, BCL2, CDK1, NOX4, ADA	195	3653	20624	1.50554	0.451141	0.0177098	0.0156542	2.74864
GOTERM_CC_DIRECT	GO:0008303~caspase complex	3	1.53846	0.00179206	CASP8, CASP3, CASP2	195	7	20624	45.3275	0.452654	0.0177098	0.0156542	2.74665
GOTERM_CC_DIRECT	GO:0030424~axon	11	5.64103	0.00221301	RET, GSK3B, MAPK8, STAT1, INSR, LRRK2, MAPT, OPRM1, COMT, RHOA, CYP17A1	195	360	20624	3.23168	0.524978	0.0212448	0.0187789	2.65502
GOTERM_CC_DIRECT	GO:0000791~euchromatin	5	2.5641	0.00260712	JUN, NR1H4, JAK2, HIF1A, ESR1	195	61	20624	8.66919	0.584027	0.0243331	0.0215087	2.58384
GOTERM_CC_DIRECT	GO:0030667~secretory granule membrane	6	3.07692	0.00278833	LGALS3, SELL, ANPEP, CXCR2, ITPR1, RHOA	195	102	20624	6.22142	0.608664	0.0253211	0.022382	2.55466
GOTERM_CC_DIRECT	GO:0043209~myelin sheath	4	2.05128	0.00332526	HSP90AA1, ERBB2, BCL2, GLUL	195	32	20624	13.2205	0.673443	0.0294023	0.0259895	2.47817
GOTERM_CC_DIRECT	GO:0030425~dendrite	12	6.15385	0.00356271	RET, NQO1, GSK3B, STAT1, ADORA3, LRRK2, HTR2C, MAPT, OPRM1, COMT, MTOR, CCR2	195	448	20624	2.83297	0.698567	0.0306941	0.0271314	2.44822
GOTERM_CC_DIRECT	GO:0031093~platelet alpha granule lumen	5	2.5641	0.00366574	SERPINA1, ALB, PLG, IGF1, VEGFA	195	67	20624	7.89284	0.70886	0.0307922	0.0272181	2.43584
GOTERM_CC_DIRECT	GO:0005641~nuclear envelope lumen	3	1.53846	0.00376939	BCHE, ALOX5, PTGES	195	10	20624	31.7292	0.718862	0.0308906	0.0273051	2.42373
GOTERM_CC_DIRECT	GO:0098978~glutamatergic synapse	11	5.64103	0.00573305	CDC42, GSK3B, ITGB3, LRRK2, PLG, PLAT, JAK2, MAPK14, RELA, RHOA, MAPK3	195	411	20624	2.83067	0.85512	0.0458644	0.0405409	2.24161
GOTERM_CC_DIRECT	GO:0005769~early endosome	9	4.61538	0.00942575	RET, PTPN1, AKT2, ERBB2, KDR, MAPK1, CFTR, LTF, MAPK3	195	311	20624	3.0607	0.9585	0.0736523	0.0651034	2.02568
GOTERM_CC_DIRECT	GO:0035578~azurophil granule lumen	5	2.5641	0.0107439	TTR, ARG1, PRKCD, MAPK1, MPO	195	91	20624	5.81121	0.97347	0.082044	0.0725211	1.96884
GOTERM_CC_DIRECT	GO:0030141~secretory granule	5	2.5641	0.0133392	CDC42, IL1B, MPO, LTF, VEGFA	195	97	20624	5.45176	0.989025	0.0995991	0.0880385	1.87487
GOTERM_CC_DIRECT	GO:0098685~Schaffer collateral - CA1 synapse	5	2.5641	0.015273	CDC42, ADORA3, ITPR1, PLG, PLAT	195	101	20624	5.23585	0.994323	0.109186	0.0965124	1.81608
GOTERM_CC_DIRECT	GO:0032587~ruffle membrane	5	2.5641	0.015273	AKT2, ITGB3, ERBB2, RHOA, EGFR	195	101	20624	5.23585	0.994323	0.109186	0.0965124	1.81608
GOTERM_CC_DIRECT	GO:1905370~serine-type endopeptidase complex	3	1.53846	0.0164371	PLAU, F2, F3	195	21	20624	15.1092	0.996185	0.11506	0.101704	1.78418
GOTERM_CC_DIRECT	GO:0031526~brush border membrane	4	2.05128	0.0197887	HSP90AA1, ACE, SLC19A1, ABCG2	195	61	20624	6.93535	0.998788	0.135694	0.119943	1.70358
GOTERM_CC_DIRECT	GO:0009925~basal plasma membrane	4	2.05128	0.0243217	ABCC1, ACE, ERBB2, EGFR	195	66	20624	6.40995	0.999745	0.163442	0.144471	1.61401
GOTERM_CC_DIRECT	GO:0005764~lysosome	8	4.10256	0.0288296	ACE, IL1B, INSR, LRRK2, CAT, MPO, ADA, MTOR	195	312	20624	2.7119	0.999946	0.189936	0.16789	1.54016
GOTERM_CC_DIRECT	GO:0005768~endosome	8	4.10256	0.0321265	FLT1, ACE, LRRK2, KDR, OPRM1, RHOA, EGFR, TGFBR1	195	320	20624	2.6441	0.999983	0.20429	0.180578	1.49314
GOTERM_CC_DIRECT	GO:0005657~replication fork	3	1.53846	0.0322243	DNMT1, CHEK1, TP53	195	30	20624	10.5764	0.999983	0.20429	0.180578	1.49182
GOTERM_CC_DIRECT	GO:0016324~apical plasma membrane	9	4.61538	0.0334003	HSP90AA1, ABCC1, ABCB1, ITGB3, ERBB2, AKR1A1, CFTR, SLC19A1, ABCG2	195	394	20624	2.41593	0.999989	0.207824	0.183702	1.47625
GOTERM_CC_DIRECT	GO:0098794~postsynapse	5	2.5641	0.0353676	GSK3B, LRRK2, PLAT, JAK2, RHOA	195	131	20624	4.0368	0.999994	0.216064	0.190985	1.45139
GOTERM_CC_DIRECT	GO:1990604~IRE1-TRAF2-ASK1 complex	2	1.02564	0.0371012	ERN1, MAP3K5	195	4	20624	52.8821	0.999997	0.218702	0.193317	1.43061
GOTERM_CC_DIRECT	GO:0035867~alphav-beta3 integrin-IGF-1-IGF1R complex	2	1.02564	0.0371012	ITGB3, IGF1	195	4	20624	52.8821	0.999997	0.218702	0.193317	1.43061
GOTERM_CC_DIRECT	GO:0097013~phagocytic vesicle lumen	2	1.02564	0.0461604	MPO, LTF	195	5	20624	42.3056	1	0.258498	0.228494	1.33573
GOTERM_CC_DIRECT	GO:0097180~serine protease inhibitor complex	2	1.02564	0.0461604	PLAU, PLAT	195	5	20624	42.3056	1	0.258498	0.228494	1.33573
GOTERM_CC_DIRECT	GO:0070021~transforming growth factor beta1-type II receptor-type I receptor complex	2	1.02564	0.0461604	TGFBR1, TGFBR2	195	5	20624	42.3056	1	0.258498	0.228494	1.33573
GOTERM_CC_DIRECT	GO:0072562~blood microparticle	5	2.5641	0.0479218	BCHE, ALB, PLG, F2, GC	195	145	20624	3.64704	1	0.263962	0.233324	1.31947
GOTERM_CC_DIRECT	GO:0097443~sorting endosome	2	1.02564	0.0551349	PTPN1, KDR	195	6	20624	35.2547	1	0.294053	0.259922
GOTERM_CC_DIRECT	GO:0098591~external side of apical plasma membrane	2	1.02564	0.0551349	ABCB1, ABCG2	195	6	20624	35.2547	1	0.294053	0.259922
GOTERM_CC_DIRECT	GO:0032993~protein-DNA complex	3	1.53846	0.061822	PARP1, PRKDC, TOP1	195	43	20624	7.37889	1	0.324565	0.286893
GOTERM_CC_DIRECT	GO:0031264~death-inducing signaling complex	2	1.02564	0.0640254	CASP8, CASP3	195	7	20624	30.2183	1	0.330962	0.292547
GOTERM_CC_DIRECT	GO:0043204~perikaryon	5	2.5641	0.0655469	LRRK2, OPRM1, TOP1, GLUL, CCR2	195	161	20624	3.2846	1	0.333693	0.294961
GOTERM_CC_DIRECT	GO:0016529~sarcoplasmic reticulum	3	1.53846	0.0722467	GSTM2, ITPR1, XDH	195	47	20624	6.7509	1	0.358661	0.31703
GOTERM_CC_DIRECT	GO:0098590~plasma membrane region	2	1.02564	0.0728326	ERBB2, EGFR	195	8	20624	26.441	1	0.358661	0.31703
GOTERM_CC_DIRECT	GO:0030054~cell junction	6	3.07692	0.0736535	ITGB3, KDR, S100A9, RHOA, ADA, EGFR	195	237	20624	2.67757	1	0.358661	0.31703
GOTERM_CC_DIRECT	GO:0016605~PML body	4	2.05128	0.0784175	CDK9, TERT, TP53, MTOR	195	106	20624	3.9911	1	0.376404	0.332714
GOTERM_CC_DIRECT	GO:0000781~chromosome, telomeric region	5	2.5641	0.0831536	TERT, PARP1, PRKDC, CHEK1, CDK1	195	175	20624	3.02183	1	0.393516	0.34784
GOTERM_CC_DIRECT	GO:0016323~basolateral plasma membrane	6	3.07692	0.0892792	HSP90AA1, ABCC1, LRRK2, ERBB2, EGFR, SLC19A1	195	251	20624	2.52823	1	0.416636	0.368277
GOTERM_CC_DIRECT	GO:0031965~nuclear membrane	6	3.07692	0.0978192	EDNRB, SULT1E1, CDK4, ALOX5, BCL2, EGFR	195	258	20624	2.45963	1	0.444708	0.39309
GOTERM_CC_DIRECT	GO:0010008~endosome membrane	6	3.07692	0.0979417	RET, FLT3, INSR, ERBB2, EGFR, CFTR	195	259	20624	2.45013	1	0.444708	0.39309
GOTERM_CC_DIRECT	GO:0030496~midbody	5	2.5641	0.0998683	CDC42, HSPA5, CDK1, LAP3, RHOA	195	187	20624	2.82792	1	0.44741	0.395479
