# Supplementary material for: Potential Hepatoprotective Effects of Chamaecyparis lawsoniana against Methotrexate-Induced Liver Injury: Integrated Phytochemical Profiling, Target Network Analysis, and Experimental Validation
Source: Antioxidants (Basel). 2023 Dec 14;12(12):2118. doi: 10.3390/antiox12122118 (PMC10740566; doi:10.3390/antiox12122118)
Supplement: Supplementary file 1 [file antioxidants-12-02118-s001.zip › Table S10.xlsx]

## Sheet: MF
Category	Term	Count	%	PValue	Genes	List Total	Pop Hits	Pop Total	Fold Enrichment	Bonferroni	Benjamini	FDR	Negative log10 PValue
GOTERM_MF_DIRECT	GO:0019899~enzyme binding	32	16.4103	2.61696e-19	PRKDC, ITGB3, PLG, CYP2C19, CYP3A4, PTGS2, HIF1A, RELA, EGFR, MAPK8, CASP2, HMOX1, PTPN1, BCHE, GSTM2, JUN, HSP90AA1, GSTM1, PARP1, HSPA5, STAT1, PRKCD, MAPK14, SOD2, ESR1, ERN1, CAT, MDM2, PPARG, MAPT, TP53, CFTR	195	380	18945	8.18138	1.87636e-16	1.87636e-16	1.72719e-16	18.5822
GOTERM_MF_DIRECT	GO:0042802~identical protein binding	59	30.2564	5.31474e-17	ALK, SERPINA1, LRRK2, ITGB3, HTR2C, PYGL, NR3C1, TNF, PIK3CG, ALAD, CASP8, PNP, KDR, CASP2, JAK2, GLUL, CCR2, MAP3K5, CPT1A, G6PD, HSP90AA1, PARP1, ARG1, SORD, MIF, MMP9, ERN1, CAT, PPARG, MAPT, HPRT1, TP53, ABCG2, MAOB, EGFR, RELA, CRYZ, CDC42, TTR, TERT, CCL5, ERBB2, HMOX1, MAPK1, MAPK3, NQO1, BCHE, JUN, STAT1, INSR, GSS, SOD2, ESR1, MTOR, VEGFA, ALB, BCL2, LCN2, MDM2	195	1704	18945	3.36389	3.81067e-14	1.90534e-14	1.75387e-14	16.2745
GOTERM_MF_DIRECT	GO:0042803~protein homodimerization activity	35	17.9487	1.38029e-13	ACHE, FECH, LRRK2, ODC1, AHR, TYMS, PTGS2, RELA, TYMP, TERT, CCL5, HNF4A, HMOX1, XDH, MCL1, MAP3K5, GSTM2, ST6GAL1, G6PD, HSP90AA1, GSTM1, PARP1, NOS2, STAT1, EPHX2, GSS, VEGFA, ERN1, ADRB3, CAT, KIT, BCL2, KYAT1, TKT, ABCG2	195	736	18945	4.62009	9.89465e-11	3.29889e-11	3.03663e-11	12.86
GOTERM_MF_DIRECT	GO:0004879~RNA polymerase II transcription factor activity, ligand-activated sequence-specific DNA binding	13	6.66667	2.22452e-13	VDR, NR1H2, NR1I3, NR1I2, NR1H4, NR1H3, AHR, NR3C1, ESR1, HNF4A, PPARG, PPARA, PPARD	195	54	18945	23.3889	1.59524e-10	3.98744e-11	3.67045e-11	12.6528
GOTERM_MF_DIRECT	GO:0004712~protein serine/threonine/tyrosine kinase activity	27	13.8462	5.68855e-13	RET, ALK, GSK3B, FLT1, FLT3, PRKDC, LRRK2, EGFR, PIK3CG, MAPK8, AKT2, ERBB2, CHEK1, KDR, MAPK1, JAK2, MAPK3, MAP3K5, INSR, PRKCD, MAPK14, MTOR, CDK9, ERN1, CDK4, KIT, CDK1	195	440	18945	5.96171	4.07886e-10	8.15738e-11	7.50889e-11	12.245
GOTERM_MF_DIRECT	GO:0016491~oxidoreductase activity	18	9.23077	1.81308e-10	GSTK1, MAOB, NOS2, ADH1C, MAOA, GSTO1, NOS3, ADH1B, SORD, CYP3A4, CYP2C19, CYP17A1, CRYZ, CYP2C9, NOX4, XDH, HAO2, FADS1	195	226	18945	7.73792	1.29998e-07	2.16663e-08	1.99439e-08	9.74158
GOTERM_MF_DIRECT	GO:0008270~zinc ion binding	33	16.9231	3.20686e-10	DNMT1, ADH1C, ADH1B, EHMT2, NR1I3, GLO1, ADH1A, NR1I2, NR3C1, CRYZ, ALAD, CA3, ANPEP, HNF4A, PTPN1, ACE, PARP1, VDR, NR1H2, MMP2, NR1H4, SORD, NR1H3, MMP9, ESR1, ALB, MDM2, PPARG, PPARA, S100A9, TP53, ADA, PPARD	195	873	18945	3.67248	2.29932e-07	3.28474e-08	3.02361e-08	9.49392
GOTERM_MF_DIRECT	GO:0020037~heme binding	14	7.17949	6.23073e-09	NOS2, FECH, NOS3, CYP3A4, PTGS2, CYP2C19, MPO, CYP17A1, CYP2C9, CYP2C8, CAT, NOX4, HMOX1, JAK2	195	153	18945	8.88989	4.46742e-06	5.58429e-07	5.14035e-07	8.20546
GOTERM_MF_DIRECT	GO:0002020~protease binding	12	6.15385	1.89734e-08	GSK3B, SERPINA1, SELL, CASP3, ITGB3, KIT, BCL2, PLG, MIF, TNF, TP53, F3	195	111	18945	10.5031	1.36039e-05	1.40313e-06	1.29159e-06	7.72185
GOTERM_MF_DIRECT	GO:0001223~transcription coactivator binding	9	4.61538	1.95695e-08	CDK9, TERT, STAT1, AHR, PPARA, HIF1A, ESR1, RELA, PPARD	195	46	18945	19.0084	1.40312e-05	1.40313e-06	1.29159e-06	7.70842
GOTERM_MF_DIRECT	GO:0004674~protein serine/threonine kinase activity	20	10.2564	2.93745e-08	GSK3B, PRKDC, LRRK2, PRKCD, MAPK14, TGFBR1, MTOR, PIK3CG, TGFBR2, CDK9, ERN1, MAPK8, CDK4, AKT2, CHEK1, CDK1, MAPK1, TOP1, MAP3K5, MAPK3	195	398	18945	4.8821	2.10613e-05	1.91468e-06	1.76247e-06	7.53203
GOTERM_MF_DIRECT	GO:0005524~ATP binding	41	21.0256	3.61805e-08	RET, ALK, GSK3B, FLT1, ABCB1, FLT3, PRKDC, LRRK2, PYGL, EGFR, PIK3CG, MAPK8, AKT2, ERBB2, CHEK1, FPGS, KDR, MAPK1, JAK2, GLUL, MAPK3, MAP3K5, ABCC1, HSP90AA1, HSPA5, GSS, INSR, PRKCD, NME2, MAPK14, TGFBR1, MTOR, TGFBR2, CDK9, ERN1, CDK4, KIT, CDK1, TOP1, CFTR, ABCG2	195	1543	18945	2.58153	2.59411e-05	2.16178e-06	1.98993e-06	7.44153
GOTERM_MF_DIRECT	GO:0004714~transmembrane receptor protein tyrosine kinase activity	9	4.61538	6.25255e-08	RET, ALK, FLT1, FLT3, INSR, ERBB2, KIT, KDR, EGFR	195	53	18945	16.4978	4.48298e-05	3.44852e-06	3.17437e-06	7.20394
GOTERM_MF_DIRECT	GO:0004672~protein kinase activity	19	9.74359	7.22429e-08	RET, GSK3B, PRKDC, LRRK2, PRKCD, MAPK14, EGFR, TGFBR1, MTOR, PIK3CG, CDK9, CDK4, CCL5, AKT2, ERBB2, CHEK1, CDK1, JAK2, MAP3K5	195	378	18945	4.88339	5.17968e-05	3.69987e-06	3.40574e-06	7.1412
GOTERM_MF_DIRECT	GO:0005504~fatty acid binding	8	4.10256	8.41062e-08	FABP1, GSTM2, FABP4, HNF4A, GSTP1, ALB, GSTA1, PPARD	195	37	18945	21.0062	6.03023e-05	4.02028e-06	3.70067e-06	7.07517
GOTERM_MF_DIRECT	GO:0005515~protein binding	163	83.5897	1.08517e-07	EHMT2, PLAT, AHR, COMT, NR3C1, MPO, TNF, LGALS3, EDNRA, EDNRB, PNP, PLAU, AKT2, CHEK1, KDR, GLUL, MAP3K5, GSTK1, ST6GAL1, G6PD, PRKCD, MIF, CDC25C, CDC25B, ERN1, SULT2B1, RBP4, LAP3, HPRT1, S100A9, TP53, CFTR, PTGES, ABCG2, DNMT1, ABCB1, MAOB, FECH, MAOA, PRKDC, GLO1, ITPR1, HIF1A, SULT1A1, PRDX5, TERT, TBXA2R, HMOX1, HAO2, MCL1, FDFT1, GSTM2, JUN, HSPA5, VDR, INSR, IGF1, SELE, ESR1, IL2, CDK9, C…	195	12648	18945	1.25206	7.7804e-05	4.86294e-06	4.47635e-06	6.9645
GOTERM_MF_DIRECT	GO:0004364~glutathione transferase activity	7	3.58974	2.64098e-07	GSTK1, GSTM2, GSTM1, GSTO1, GSTP1, GSTA1, PTGES	195	27	18945	25.188	0.000189341	1.07345e-05	9.88117e-06	6.57823
GOTERM_MF_DIRECT	GO:0019904~protein domain specific binding	15	7.69231	2.69486e-07	HSPA5, PRKDC, INSR, ITPR1, PLG, OPRM1, HIF1A, RHOA, IL1B, CHEK1, MDM2, CASP2, TOP1, PPARA, MAP3K5	195	247	18945	5.90003	0.000193203	1.07345e-05	9.88117e-06	6.56946
GOTERM_MF_DIRECT	GO:0016301~kinase activity	14	7.17949	7.13967e-07	ALK, RET, GSK3B, PRKDC, LRRK2, EGFR, MTOR, PIK3CG, CDK9, PLAU, CDK4, ERBB2, CDK1, JAK2	195	229	18945	5.93954	0.000511783	2.69428e-05	2.48009e-05	6.14632
GOTERM_MF_DIRECT	GO:0004713~protein tyrosine kinase activity	10	5.12821	2.45379e-06	RET, ALK, FLT1, FLT3, INSR, ERBB2, KIT, KDR, JAK2, EGFR	195	113	18945	8.59769	0.00175782	8.79683e-05	8.0975e-05	5.61016
GOTERM_MF_DIRECT	GO:0019903~protein phosphatase binding	9	4.61538	3.95873e-06	LGALS3, HSP90AA1, MAPK8, ERBB2, PPARG, MAPK14, TP53, EGFR, MAP3K5	195	90	18945	9.71538	0.00283439	0.000134251	0.000123578	5.40244
GOTERM_MF_DIRECT	GO:0050661~NADP binding	7	3.58974	4.11926e-06	DHFR, G6PD, NOS2, NOS3, GSR, CAT, HMGCR	195	42	18945	16.1923	0.00294916	0.000134251	0.000123578	5.38518
GOTERM_MF_DIRECT	GO:0043565~sequence-specific DNA binding	15	7.69231	1.21894e-05	VDR, NR1H2, NR1I3, NR1I2, NR1H4, NR1H3, NR3C1, HIF1A, ESR1, HNF4A, BCL2, PPARG, MAPT, PPARA, PPARD	195	342	18945	4.26113	0.00870175	0.00036974	0.000340346	4.91402
GOTERM_MF_DIRECT	GO:0005496~steroid binding	6	3.07692	1.23762e-05	SULT1E1, SERPINA6, CYP3A4, NR3C1, SHBG, ESR1	195	30	18945	19.4308	0.00883456	0.00036974	0.000340346	4.90741
GOTERM_MF_DIRECT	GO:0005506~iron ion binding	10	5.12821	1.88361e-05	CYP2C9, CYP2C8, ALOX5, PAH, LCN2, CYP2C19, CYP3A4, XDH, CYP17A1, LTF	195	145	18945	6.70027	0.0134149	0.000540221	0.000497274	4.72501
GOTERM_MF_DIRECT	GO:0019838~growth factor binding	6	3.07692	3.57188e-05	FLT1, FLT3, ERBB2, KIT, KDR, TGFBR1	195	37	18945	15.7547	0.0252856	0.000972775	0.000895442	4.4471
GOTERM_MF_DIRECT	GO:0016209~antioxidant activity	5	2.5641	3.66317e-05	FABP1, PRDX5, ALB, CAT, S100A9	195	19	18945	25.5668	0.0259235	0.000972775	0.000895442	4.43614
GOTERM_MF_DIRECT	GO:0004602~glutathione peroxidase activity	5	2.5641	6.74901e-05	GSTK1, GSTM2, GSTP1, GSTA1, PTGES	195	22	18945	22.0804	0.0472398	0.00170425	0.00156877	4.17076
GOTERM_MF_DIRECT	GO:0050660~flavin adenine dinucleotide binding	7	3.58974	6.89308e-05	MAOB, NOS2, MAOA, NOS3, GSR, NOX4, XDH	195	68	18945	10.0011	0.0482235	0.00170425	0.00156877	4.16159
GOTERM_MF_DIRECT	GO:0051879~Hsp90 protein binding	6	3.07692	8.3973e-05	ERN1, KDR, AHR, MAPT, NR3C1, HIF1A	195	44	18945	13.2483	0.0584343	0.00200696	0.00184741	4.07586
GOTERM_MF_DIRECT	GO:0031625~ubiquitin protein ligase binding	13	6.66667	9.3677e-05	GSK3B, JUN, HSP90AA1, ABCB1, HSPA5, PTPN22, HIF1A, EGFR, RELA, CASP8, MDM2, BCL2, TP53	195	312	18945	4.04808	0.0649633	0.00216666	0.00199441	4.02837
GOTERM_MF_DIRECT	GO:0019901~protein kinase binding	17	8.71795	9.84235e-05	PTPN1, GSK3B, PARP1, PRKCD, CDC25C, NR3C1, HIF1A, ESR1, RHOA, RELA, CDC25B, CDK9, CDC42, MAPT, JAK2, TP53, MAP3K5	195	522	18945	3.16401	0.0681404	0.0022053	0.00202998	4.0069
GOTERM_MF_DIRECT	GO:0043295~glutathione binding	4	2.05128	0.000120332	GSTM2, GSTM1, GSS, PTGES	195	10	18945	38.8615	0.0826656	0.00261448	0.00240664	3.91962
GOTERM_MF_DIRECT	GO:0003700~transcription factor activity, sequence-specific DNA binding	17	8.71795	0.000232803	JUN, STAT1, VDR, NR1H2, NR1I3, NR1I2, NR1H4, AHR, NR3C1, HIF1A, ESR1, RELA, HNF4A, PPARG, PPARA, TP53, PPARD	195	563	18945	2.9336	0.153749	0.0049094	0.00451911	3.63301
GOTERM_MF_DIRECT	GO:0051721~protein phosphatase 2A binding	5	2.5641	0.000270128	PTPN1, STAT1, BCL2, MAPT, TP53	195	31	18945	15.67	0.176101	0.00553376	0.00509384	3.56843
GOTERM_MF_DIRECT	GO:0008353~RNA polymerase II carboxy-terminal domain kinase activity	4	2.05128	0.000280358	CDK9, CDK4, CDK1, MAPK1	195	13	18945	29.8935	0.182124	0.00558379	0.00513989	3.55229
GOTERM_MF_DIRECT	GO:0046965~retinoid X receptor binding	4	2.05128	0.000439336	VDR, NR1H2, NR1H4, PPARG	195	15	18945	25.9077	0.270264	0.00851362	0.0078368	3.3572
GOTERM_MF_DIRECT	GO:0019825~oxygen binding	5	2.5641	0.000485905	ALB, CYP2C19, CYP3A4, SOD2, CYP17A1	195	36	18945	13.4936	0.294239	0.00916827	0.00843941	3.31345
GOTERM_MF_DIRECT	GO:0004707~MAP kinase activity	4	2.05128	0.000536655	MAPK8, MAPK1, MAPK14, MAPK3	195	16	18945	24.2885	0.319471	0.0098662	0.00908185	3.2703
GOTERM_MF_DIRECT	GO:0061629~RNA polymerase II sequence-specific DNA binding transcription factor binding	9	4.61538	0.000587889	GSK3B, JUN, PARP1, PRKDC, HNF4A, AHR, PPARA, HIF1A, TP53	195	182	18945	4.80431	0.34403	0.0105379	0.00970018	3.2307
GOTERM_MF_DIRECT	GO:0034875~caffeine oxidase activity	3	1.53846	0.000617529	CYP2C9, CYP2C8, CYP3A4	195	4	18945	72.8654	0.357832	0.0105421	0.00970403	3.20934
GOTERM_MF_DIRECT	GO:0050294~steroid sulfotransferase activity	3	1.53846	0.000617529	SULT1A1, SULT2B1, SULT1E1	195	4	18945	72.8654	0.357832	0.0105421	0.00970403	3.20934
GOTERM_MF_DIRECT	GO:0004252~serine-type endopeptidase activity	9	4.61538	0.000726732	F9, PLAU, MMP2, PLG, PLAT, F2, F3, MMP9, LTF	195	188	18945	4.65098	0.406226	0.0121178	0.0111545	3.13863
GOTERM_MF_DIRECT	GO:0051087~chaperone binding	7	3.58974	0.000902195	TERT, HSPA5, ALB, PLG, MAPT, TP53, CFTR	195	109	18945	6.23924	0.476473	0.0147017	0.0135329	3.0447
GOTERM_MF_DIRECT	GO:0003682~chromatin binding	14	7.17949	0.00112775	JUN, DNMT1, PARP1, MPO, ESR1, EGFR, RELA, CDK9, FABP1, HNF4A, CDK1, PPARG, TOP1, TP53	195	469	18945	2.90011	0.55472	0.0179688	0.0165403	2.94779
GOTERM_MF_DIRECT	GO:0004497~monooxygenase activity	6	3.07692	0.00123294	CYP2C9, CYP2C8, PAH, CYP2C19, CYP3A4, CYP17A1	195	78	18945	7.47337	0.587104	0.0192177	0.0176899	2.90906
GOTERM_MF_DIRECT	GO:0003690~double-stranded DNA binding	7	3.58974	0.00130278	JUN, STAT1, PRKDC, PPARG, MAPT, TOP1, EGFR	195	117	18945	5.81262	0.607298	0.0198744	0.0182944	2.88513
GOTERM_MF_DIRECT	GO:0003677~DNA binding	28	14.359	0.00135181	DNMT1, NR1I3, AHR, NR3C1, HIF1A, RELA, TERT, HNF4A, DNMT3B, MAPK1, JUN, PARP1, STAT1, VDR, NR1H2, NME2, NR1H3, SOD2, ESR1, CDK9, ALB, PPARG, MAPT, TOP1, PPARA, TP53, LTF, PPARD	195	1421	18945	1.91436	0.620879	0.0201926	0.0185873	2.86909
GOTERM_MF_DIRECT	GO:0042910~xenobiotic transporter activity	4	2.05128	0.00160999	ABCC1, ABCB1, SLC19A1, ABCG2	195	23	18945	16.8963	0.685035	0.0235584	0.0216856	2.79318
GOTERM_MF_DIRECT	GO:0004024~alcohol dehydrogenase activity, zinc-dependent	3	1.53846	0.00211794	ADH1C, ADH1B, ADH1A	195	7	18945	41.6374	0.781326	0.0303712	0.0279568	2.67409
GOTERM_MF_DIRECT	GO:0030235~nitric-oxide synthase regulator activity	3	1.53846	0.00280491	HSP90AA1, ESR1, EGFR	195	8	18945	36.4327	0.866539	0.0381099	0.0350803	2.55208
GOTERM_MF_DIRECT	GO:0005021~vascular endothelial growth factor-activated receptor activity	3	1.53846	0.00280491	FLT1, FLT3, KDR	195	8	18945	36.4327	0.866539	0.0381099	0.0350803	2.55208
GOTERM_MF_DIRECT	GO:0000287~magnesium ion binding	9	4.61538	0.00281705	ERN1, EPHX2, GSS, LRRK2, HPRT1, COMT, TKT, GLUL, MAP3K5	195	233	18945	3.75272	0.867699	0.0381099	0.0350803	2.55021
GOTERM_MF_DIRECT	GO:0000976~transcription regulatory region sequence-specific DNA binding	9	4.61538	0.0028983	JUN, HNF4A, NR1H4, NR1H3, PPARG, AHR, TNF, TP53, RELA	195	234	18945	3.73669	0.875207	0.038483	0.0354237	2.53786
GOTERM_MF_DIRECT	GO:0070330~aromatase activity	4	2.05128	0.00350192	CYP2C9, CYP2C8, CYP2C19, CYP3A4	195	30	18945	12.9538	0.91916	0.0451845	0.0415924	2.45569
GOTERM_MF_DIRECT	GO:0016705~oxidoreductase activity, acting on paired donors, with incorporation or reduction of molecular oxygen	5	2.5641	0.00352905	CYP2C9, CYP2C8, CYP2C19, CYP3A4, CYP17A1	195	61	18945	7.96343	0.920723	0.0451845	0.0415924	2.45234
GOTERM_MF_DIRECT	GO:0001228~transcriptional activator activity, RNA polymerase II transcription regulatory region sequence-specific binding	13	6.66667	0.00384226	JUN, NR1H2, NR1I3, NR1I2, NR1H4, NR1H3, NR3C1, HIF1A, ESR1, RELA, HNF4A, PPARA, TP53	195	477	18945	2.6478	0.936721	0.0483316	0.0444894	2.41541
GOTERM_MF_DIRECT	GO:0001968~fibronectin binding	4	2.05128	0.00421459	ITGA4, MMP2, ITGB3, VEGFA	195	32	18945	12.1442	0.9516	0.0521011	0.0479592	2.37524
GOTERM_MF_DIRECT	GO:0097153~cysteine-type endopeptidase activity involved in apoptotic process	3	1.53846	0.0044475	CASP8, CASP3, CASP2	195	10	18945	29.1462	0.959073	0.0522764	0.0481205	2.35188
GOTERM_MF_DIRECT	GO:0032052~bile acid binding	3	1.53846	0.0044475	FABP1, NR1H4, PYGL	195	10	18945	29.1462	0.959073	0.0522764	0.0481205	2.35188
GOTERM_MF_DIRECT	GO:0097199~cysteine-type endopeptidase activity involved in apoptotic signaling pathway	3	1.53846	0.0044475	CASP8, CASP3, CASP2	195	10	18945	29.1462	0.959073	0.0522764	0.0481205	2.35188
GOTERM_MF_DIRECT	GO:0008395~steroid hydroxylase activity	4	2.05128	0.00460148	CYP2C9, CYP2C8, CYP2C19, CYP3A4	195	33	18945	11.7762	0.963369	0.0532139	0.0489835	2.3371
GOTERM_MF_DIRECT	GO:0002039~p53 binding	5	2.5641	0.00637816	GSK3B, EHMT2, MDM2, HIF1A, TP53	195	72	18945	6.74679	0.989825	0.0721006	0.0663687	2.1953
GOTERM_MF_DIRECT	GO:0097200~cysteine-type endopeptidase activity involved in execution phase of apoptosis	3	1.53846	0.00643576	CASP8, CASP3, CASP2	195	12	18945	24.2885	0.990239	0.0721006	0.0663687	2.1914
GOTERM_MF_DIRECT	GO:0043621~protein self-association	5	2.5641	0.00702193	ACHE, FLT3, CCL5, PPARG, TP53	195	74	18945	6.56445	0.993607	0.0774572	0.0712996	2.15354
GOTERM_MF_DIRECT	GO:0042056~chemoattractant activity	4	2.05128	0.00736972	LGALS3, CCL5, MIF, VEGFA	195	39	18945	9.9645	0.995027	0.0785055	0.0722644	2.13255
GOTERM_MF_DIRECT	GO:0070492~oligosaccharide binding	3	1.53846	0.00755492	LGALS3, SELL, SELE	195	13	18945	22.4201	0.995649	0.0785055	0.0722644	2.12177
GOTERM_MF_DIRECT	GO:0043560~insulin receptor substrate binding	3	1.53846	0.00755492	INSR, PRKCD, JAK2	195	13	18945	22.4201	0.995649	0.0785055	0.0722644	2.12177
GOTERM_MF_DIRECT	GO:0005542~folic acid binding	3	1.53846	0.00755492	DHFR, TYMS, SLC19A1	195	13	18945	22.4201	0.995649	0.0785055	0.0722644	2.12177
GOTERM_MF_DIRECT	GO:0004175~endopeptidase activity	5	2.5641	0.0080658	ACE, F9, MMP2, PLG, MMP9	195	77	18945	6.30869	0.996992	0.0826168	0.076049	2.09335
GOTERM_MF_DIRECT	GO:0008559~xenobiotic-transporting ATPase activity	3	1.53846	0.00875505	ABCC1, ABCB1, ABCG2	195	14	18945	20.8187	0.998173	0.0859914	0.0791553	2.05774
GOTERM_MF_DIRECT	GO:0005161~platelet-derived growth factor receptor binding	3	1.53846	0.00875505	ERN1, ITGB3, VEGFA	195	14	18945	20.8187	0.998173	0.0859914	0.0791553	2.05774
GOTERM_MF_DIRECT	GO:0015562~efflux transmembrane transporter activity	3	1.53846	0.00875505	ABCC1, ABCB1, ABCG2	195	14	18945	20.8187	0.998173	0.0859914	0.0791553	2.05774
GOTERM_MF_DIRECT	GO:0016922~ligand-dependent nuclear receptor binding	4	2.05128	0.00965951	STAT1, NR1I2, NR1H4, HIF1A	195	43	18945	9.03757	0.99905	0.0935928	0.0861524	2.01504
GOTERM_MF_DIRECT	GO:0042826~histone deacetylase binding	6	3.07692	0.0112728	HSP90AA1, MAPK8, PARP1, HIF1A, TP53, RELA	195	131	18945	4.44979	0.999705	0.106071	0.097639	1.94797
GOTERM_MF_DIRECT	GO:0010181~FMN binding	3	1.53846	0.0113912	NOS2, NOS3, HAO2	195	16	18945	18.2163	0.999729	0.106071	0.097639	1.94343
GOTERM_MF_DIRECT	GO:0070402~NADPH binding	3	1.53846	0.0113912	DHFR, HMGCR, CRYZ	195	16	18945	18.2163	0.999729	0.106071	0.097639	1.94343
GOTERM_MF_DIRECT	GO:0042626~ATPase activity, coupled to transmembrane movement of substances	4	2.05128	0.0116194	ABCC1, ABCB1, CFTR, ABCG2	195	46	18945	8.44816	0.999771	0.106809	0.098318	1.93482
GOTERM_MF_DIRECT	GO:0008392~arachidonic acid epoxygenase activity	3	1.53846	0.0128238	CYP2C9, CYP2C8, CYP2C19	195	17	18945	17.1448	0.999904	0.116388	0.107136	1.89198
GOTERM_MF_DIRECT	GO:0004708~MAP kinase kinase activity	3	1.53846	0.0143305	MAPK1, MAPK14, MAPK3	195	18	18945	16.1923	0.999968	0.128437	0.118227	1.84374
GOTERM_MF_DIRECT	GO:0001216~bacterial-type RNA polymerase transcriptional activator activity, sequence-specific DNA binding	3	1.53846	0.0159096	PPARA, HIF1A, TP53	195	19	18945	15.3401	0.99999	0.14083	0.129634	1.79834
GOTERM_MF_DIRECT	GO:0004745~retinol dehydrogenase activity	3	1.53846	0.0175596	ADH1C, ADH1B, ADH1A	195	20	18945	14.5731	0.999997	0.153539	0.141333	1.75549
GOTERM_MF_DIRECT	GO:1903981~enterobactin binding	2	1.02564	0.020376	ALB, LCN2	195	2	18945	97.1538	1	0.166018	0.15282	1.69088
GOTERM_MF_DIRECT	GO:0018676~(S)-limonene 7-monooxygenase activity	2	1.02564	0.020376	CYP2C9, CYP2C19	195	2	18945	97.1538	1	0.166018	0.15282	1.69088
GOTERM_MF_DIRECT	GO:0052741~(R)-limonene 6-monooxygenase activity	2	1.02564	0.020376	CYP2C9, CYP2C19	195	2	18945	97.1538	1	0.166018	0.15282	1.69088
GOTERM_MF_DIRECT	GO:0002060~purine nucleobase binding	2	1.02564	0.020376	PNP, PYGL	195	2	18945	97.1538	1	0.166018	0.15282	1.69088
GOTERM_MF_DIRECT	GO:0003990~acetylcholinesterase activity	2	1.02564	0.020376	ACHE, BCHE	195	2	18945	97.1538	1	0.166018	0.15282	1.69088
GOTERM_MF_DIRECT	GO:0018675~(S)-limonene 6-monooxygenase activity	2	1.02564	0.020376	CYP2C9, CYP2C19	195	2	18945	97.1538	1	0.166018	0.15282	1.69088
GOTERM_MF_DIRECT	GO:0008233~peptidase activity	5	2.5641	0.022881	ACE, CASP8, CASP3, LAP3, MMP9	195	105	18945	4.62637	1	0.178615	0.164415	1.64053
GOTERM_MF_DIRECT	GO:0016712~oxidoreductase activity, acting on paired donors, with incorporation or reduction of molecular oxygen, reduced flavin or flavoprotein as one donor, and incorporation of one atom of oxygen	3	1.53846	0.0229185	CYP2C9, CYP2C8, CYP2C19	195	23	18945	12.6722	1	0.178615	0.164415	1.63981
GOTERM_MF_DIRECT	GO:0003707~steroid hormone receptor activity	3	1.53846	0.0229185	PPARA, ESR1, PPARD	195	23	18945	12.6722	1	0.178615	0.164415	1.63981
GOTERM_MF_DIRECT	GO:0004709~MAP kinase kinase kinase activity	3	1.53846	0.0229185	LRRK2, EGFR, MAP3K5	195	23	18945	12.6722	1	0.178615	0.164415	1.63981
GOTERM_MF_DIRECT	GO:0047485~protein N-terminus binding	5	2.5641	0.0243199	TERT, PARP1, MDM2, TP53, RELA	195	107	18945	4.5399	1	0.187499	0.172593	1.61404
GOTERM_MF_DIRECT	GO:0070412~R-SMAD binding	3	1.53846	0.024836	JUN, PARP1, PPARG	195	24	18945	12.1442	1	0.18944	0.17438	1.60492
GOTERM_MF_DIRECT	GO:1990841~promoter-specific chromatin binding	4	2.05128	0.0279148	DNMT1, STAT1, EHMT2, TP53	195	64	18945	6.07212	1	0.210683	0.193934	1.55417
GOTERM_MF_DIRECT	GO:0008083~growth factor activity	6	3.07692	0.028936	IL6, IGF1, F2, IL2, TYMP, VEGFA	195	167	18945	3.49056	1	0.211679	0.194851	1.53856
GOTERM_MF_DIRECT	GO:0004962~endothelin receptor activity	2	1.02564	0.0304086	EDNRA, EDNRB	195	3	18945	64.7692	1	0.211679	0.194851	1.517
GOTERM_MF_DIRECT	GO:0047374~methylumbelliferyl-acetate deacetylase activity	2	1.02564	0.0304086	CES2, CES1	195	3	18945	64.7692	1	0.211679	0.194851	1.517
GOTERM_MF_DIRECT	GO:0004517~nitric-oxide synthase activity	2	1.02564	0.0304086	NOS2, NOS3	195	3	18945	64.7692	1	0.211679	0.194851	1.517
GOTERM_MF_DIRECT	GO:0003886~DNA (cytosine-5-)-methyltransferase activity	2	1.02564	0.0304086	DNMT1, DNMT3B	195	3	18945	64.7692	1	0.211679	0.194851	1.517
GOTERM_MF_DIRECT	GO:0047894~flavonol 3-sulfotransferase activity	2	1.02564	0.0304086	SULT1A1, SULT1E1	195	3	18945	64.7692	1	0.211679	0.194851	1.517
GOTERM_MF_DIRECT	GO:0097621~monoamine oxidase activity	2	1.02564	0.0304086	MAOB, MAOA	195	3	18945	64.7692	1	0.211679	0.194851	1.517
GOTERM_MF_DIRECT	GO:0004104~cholinesterase activity	2	1.02564	0.0304086	ACHE, BCHE	195	3	18945	64.7692	1	0.211679	0.194851	1.517
GOTERM_MF_DIRECT	GO:0030145~manganese ion binding	4	2.05128	0.0326041	ARG1, LAP3, SOD2, GLUL	195	68	18945	5.71493	1	0.222639	0.20494	1.48673
GOTERM_MF_DIRECT	GO:0042277~peptide binding	4	2.05128	0.0326041	ANPEP, PPARG, OPRM1, RELA	195	68	18945	5.71493	1	0.222639	0.20494	1.48673
GOTERM_MF_DIRECT	GO:0008201~heparin binding	6	3.07692	0.0365888	ALK, SELL, F2, MPO, LTF, VEGFA	195	178	18945	3.27485	1	0.247492	0.227817	1.43665
GOTERM_MF_DIRECT	GO:0004693~cyclin-dependent protein serine/threonine kinase activity	3	1.53846	0.0376143	CDK9, CDK4, CDK1	195	30	18945	9.71538	1	0.249336	0.229515	1.42465
GOTERM_MF_DIRECT	GO:0008237~metallopeptidase activity	4	2.05128	0.0376776	ACE, ANPEP, MMP2, MMP9	195	72	18945	5.39744	1	0.249336	0.229515	1.42392
GOTERM_MF_DIRECT	GO:0051022~Rho GDP-dissociation inhibitor binding	2	1.02564	0.0403389	HSP90AA1, RHOA	195	4	18945	48.5769	1	0.249336	0.229515	1.39428
GOTERM_MF_DIRECT	GO:0046943~carboxylic acid transmembrane transporter activity	2	1.02564	0.0403389	ABCC1, ABCB1	195	4	18945	48.5769	1	0.249336	0.229515	1.39428
GOTERM_MF_DIRECT	GO:0034191~apolipoprotein A-I receptor binding	2	1.02564	0.0403389	CDC42, NR1H2	195	4	18945	48.5769	1	0.249336	0.229515	1.39428
GOTERM_MF_DIRECT	GO:0052596~phenethylamine:oxygen oxidoreductase (deaminating) activity	2	1.02564	0.0403389	MAOB, MAOA	195	4	18945	48.5769	1	0.249336	0.229515	1.39428
GOTERM_MF_DIRECT	GO:0034617~tetrahydrobiopterin binding	2	1.02564	0.0403389	NOS2, NOS3	195	4	18945	48.5769	1	0.249336	0.229515	1.39428
GOTERM_MF_DIRECT	GO:0080030~methyl indole-3-acetate esterase activity	2	1.02564	0.0403389	CES2, CES1	195	4	18945	48.5769	1	0.249336	0.229515	1.39428
GOTERM_MF_DIRECT	GO:0009008~DNA-methyltransferase activity	2	1.02564	0.0403389	DNMT1, DNMT3B	195	4	18945	48.5769	1	0.249336	0.229515	1.39428
GOTERM_MF_DIRECT	GO:0052595~aliphatic-amine oxidase activity	2	1.02564	0.0403389	MAOB, MAOA	195	4	18945	48.5769	1	0.249336	0.229515	1.39428
GOTERM_MF_DIRECT	GO:0005164~tumor necrosis factor receptor binding	3	1.53846	0.0423249	CASP8, STAT1, TNF	195	32	18945	9.10817	1	0.259376	0.238756	1.3734
GOTERM_MF_DIRECT	GO:0052689~carboxylic ester hydrolase activity	3	1.53846	0.0447587	BCHE, CES2, CES1	195	33	18945	8.83217	1	0.267433	0.246173	1.34912
GOTERM_MF_DIRECT	GO:0036094~small molecule binding	3	1.53846	0.0447587	SULT2B1, VDR, LCN2	195	33	18945	8.83217	1	0.267433	0.246173	1.34912
GOTERM_MF_DIRECT	GO:0051059~NF-kappaB binding	3	1.53846	0.0447587	GSK3B, RELA, PPARD	195	33	18945	8.83217	1	0.267433	0.246173	1.34912
GOTERM_MF_DIRECT	GO:0001618~virus receptor activity	4	2.05128	0.0459962	ANPEP, ITGB3, CDK1, EGFR	195	78	18945	4.98225	1	0.272556	0.250889	1.33728
GOTERM_MF_DIRECT	GO:0005125~cytokine activity	6	3.07692	0.0478658	IL6, IL1B, MIF, TNF, IL2, VEGFA	195	192	18945	3.03606	1	0.28131	0.258946	1.31997
GOTERM_MF_DIRECT	GO:0008047~enzyme activator activity	4	2.05128	0.0489544	MAPK8, PARP1, PRKCD, CDK1	195	80	18945	4.85769	1	0.283233	0.260716	1.31021
GOTERM_MF_DIRECT	GO:0030298~receptor signaling protein tyrosine kinase activator activity	2	1.02564	0.0501681	ALK, CCL5	195	5	18945	38.8615	1	0.283233	0.260716
GOTERM_MF_DIRECT	GO:0043208~glycosphingolipid binding	2	1.02564	0.0501681	SELL, IL2	195	5	18945	38.8615	1	0.283233	0.260716
GOTERM_MF_DIRECT	GO:0019960~C-X3-C chemokine binding	2	1.02564	0.0501681	ITGA4, ITGB3	195	5	18945	38.8615	1	0.283233	0.260716
GOTERM_MF_DIRECT	GO:0004784~superoxide dismutase activity	2	1.02564	0.0501681	NQO1, SOD2	195	5	18945	38.8615	1	0.283233	0.260716
GOTERM_MF_DIRECT	GO:0003824~catalytic activity	5	2.5641	0.0536205	ALAD, BCHE, EPHX2, ODC1, DHODH	195	138	18945	3.52007	1	0.300359	0.276481
GOTERM_MF_DIRECT	GO:0004601~peroxidase activity	3	1.53846	0.0549868	PRDX5, PTGS2, MPO	195	37	18945	7.87734	1	0.300958	0.277033
GOTERM_MF_DIRECT	GO:0097718~disordered domain specific binding	3	1.53846	0.0549868	HSP90AA1, MDM2, TP53	195	37	18945	7.87734	1	0.300958	0.277033
GOTERM_MF_DIRECT	GO:0001221~transcription cofactor binding	3	1.53846	0.0549868	NR1H4, PPARG, ESR1	195	37	18945	7.87734	1	0.300958	0.277033
GOTERM_MF_DIRECT	GO:0005102~receptor binding	9	4.61538	0.0590395	PRDX5, GSTM2, HNF4A, LRRK2, PLG, PLAT, F2, JAK2, TGFBR1	195	408	18945	2.1431	1	0.311205	0.286464
GOTERM_MF_DIRECT	GO:0051525~NFAT protein binding	2	1.02564	0.0598971	MAPK14, PPARA	195	6	18945	32.3846	1	0.311205	0.286464
GOTERM_MF_DIRECT	GO:0035033~histone deacetylase regulator activity	2	1.02564	0.0598971	MAPK8, TP53	195	6	18945	32.3846	1	0.311205	0.286464
GOTERM_MF_DIRECT	GO:0008131~primary amine oxidase activity	2	1.02564	0.0598971	MAOB, MAOA	195	6	18945	32.3846	1	0.311205	0.286464
GOTERM_MF_DIRECT	GO:1990239~steroid hormone binding	2	1.02564	0.0598971	SULT2B1, NR3C1	195	6	18945	32.3846	1	0.311205	0.286464
GOTERM_MF_DIRECT	GO:0031702~type 1 angiotensin receptor binding	2	1.02564	0.0598971	EDNRB, JAK2	195	6	18945	32.3846	1	0.311205	0.286464
GOTERM_MF_DIRECT	GO:0051434~BH3 domain binding	2	1.02564	0.0598971	BCL2, MCL1	195	6	18945	32.3846	1	0.311205	0.286464
GOTERM_MF_DIRECT	GO:0030331~estrogen receptor binding	3	1.53846	0.0687892	PARP1, PPARG, ESR1	195	42	18945	6.93956	1	0.351062	0.323154
GOTERM_MF_DIRECT	GO:1990405~protein antigen binding	2	1.02564	0.069527	ITGA4, PLG	195	7	18945	27.7582	1	0.351062	0.323154
GOTERM_MF_DIRECT	GO:0031730~CCR5 chemokine receptor binding	2	1.02564	0.069527	STAT1, CCL5	195	7	18945	27.7582	1	0.351062	0.323154
GOTERM_MF_DIRECT	GO:0050544~arachidonic acid binding	2	1.02564	0.069527	PPARG, S100A9	195	7	18945	27.7582	1	0.351062	0.323154
GOTERM_MF_DIRECT	GO:0000166~nucleotide binding	4	2.05128	0.0721406	LRRK2, NOX4, HPRT1, LTB4R	195	94	18945	4.13421	1	0.361712	0.332957
GOTERM_MF_DIRECT	GO:0000978~RNA polymerase II core promoter proximal region sequence-specific DNA binding	19	9.74359	0.0745031	JUN, STAT1, VDR, NR1H2, NR1I3, NR1I2, NR1H4, NR1H3, NR3C1, HIF1A, ESR1, RELA, CDK9, HNF4A, PPARG, TOP1, PPARA, TP53, PPARD	195	1217	18945	1.51678	1	0.370963	0.341472
GOTERM_MF_DIRECT	GO:0101020~estrogen 16-alpha-hydroxylase activity	2	1.02564	0.0790587	CYP2C8, CYP3A4	195	8	18945	24.2885	1	0.390254	0.359229
GOTERM_MF_DIRECT	GO:0005178~integrin binding	5	2.5641	0.0799763	ITGA4, IL1B, ITGB3, KDR, IGF1	195	158	18945	3.07449	1	0.390254	0.359229
GOTERM_MF_DIRECT	GO:0000977~RNA polymerase II regulatory region sequence-specific DNA binding	8	4.10256	0.0803099	STAT1, NR1I3, EHMT2, NR1I2, NR1H4, NR3C1, HIF1A, RELA	195	363	18945	2.14113	1	0.390254	0.359229
GOTERM_MF_DIRECT	GO:0008146~sulfotransferase activity	3	1.53846	0.0805545	SULT1A1, SULT2B1, SULT1E1	195	46	18945	6.33612	1	0.390254	0.359229
GOTERM_MF_DIRECT	GO:0001222~transcription corepressor binding	3	1.53846	0.0835871	STAT1, EHMT2, ESR1	195	47	18945	6.20131	1	0.402228	0.370252
GOTERM_MF_DIRECT	GO:0004022~alcohol dehydrogenase (NAD) activity	2	1.02564	0.0884933	ADH1C, ADH1A	195	9	18945	21.5897	1	0.420197	0.386792
GOTERM_MF_DIRECT	GO:0043184~vascular endothelial growth factor receptor 2 binding	2	1.02564	0.0884933	ITGB3, VEGFA	195	9	18945	21.5897	1	0.420197	0.386792
GOTERM_MF_DIRECT	GO:0019900~kinase binding	4	2.05128	0.0891897	PRKCD, PLG, PTPN22, EGFR	195	103	18945	3.77296	1	0.420616	0.387177
GOTERM_MF_DIRECT	GO:0015026~coreceptor activity	3	1.53846	0.0897548	ITGA4, ITGB3, KDR	195	49	18945	5.94819	1	0.420616	0.387177
GOTERM_MF_DIRECT	GO:0019902~phosphatase binding	3	1.53846	0.0928877	MAPK1, PPARA, MAPK3	195	50	18945	5.82923	1	0.432471	0.39809
GOTERM_MF_DIRECT	GO:0005024~transforming growth factor beta-activated receptor activity	2	1.02564	0.0978317	TGFBR1, TGFBR2	195	10	18945	19.4308	1	0.432996	0.398574
GOTERM_MF_DIRECT	GO:1901363~heterocyclic compound binding	2	1.02564	0.0978317	FABP1, ACE	195	10	18945	19.4308	1	0.432996	0.398574
GOTERM_MF_DIRECT	GO:0008401~retinoic acid 4-hydroxylase activity	2	1.02564	0.0978317	CYP2C8, CYP3A4	195	10	18945	19.4308	1	0.432996	0.398574
GOTERM_MF_DIRECT	GO:0004062~aryl sulfotransferase activity	2	1.02564	0.0978317	SULT1A1, SULT1E1	195	10	18945	19.4308	1	0.432996	0.398574
GOTERM_MF_DIRECT	GO:0004675~transmembrane receptor protein serine/threonine kinase activity	2	1.02564	0.0978317	TGFBR1, TGFBR2	195	10	18945	19.4308	1	0.432996	0.398574
GOTERM_MF_DIRECT	GO:0001094~TFIID-class transcription factor binding	2	1.02564	0.0978317	AHR, TP53	195	10	18945	19.4308	1	0.432996	0.398574
GOTERM_MF_DIRECT	GO:0043225~ATPase-coupled anion transmembrane transporter activity	2	1.02564	0.0978317	ABCC1, CFTR	195	10	18945	19.4308	1	0.432996	0.398574
GOTERM_MF_DIRECT	GO:0015643~toxic substance binding	2	1.02564	0.0978317	EPHX2, ALB	195	10	18945	19.4308	1	0.432996	0.398574
GOTERM_MF_DIRECT	GO:1990782~protein tyrosine kinase binding	3	1.53846	0.0992471	HSP90AA1, NOX4, PTPN22	195	52	18945	5.60503	1	0.436565	0.401859
