# Supplementary material for: Potential Hepatoprotective Effects of Chamaecyparis lawsoniana against Methotrexate-Induced Liver Injury: Integrated Phytochemical Profiling, Target Network Analysis, and Experimental Validation
Source: Antioxidants (Basel). 2023 Dec 14;12(12):2118. doi: 10.3390/antiox12122118 (PMC10740566; doi:10.3390/antiox12122118)
Supplement: Supplementary file 1 [file antioxidants-12-02118-s001.zip › Table S11.xlsx]

## Sheet: KEGG
Category	Term	Count	%	PValue	Genes	List Total	Pop Hits	Pop Total	Fold Enrichment	Bonferroni	Benjamini	FDR	Negative log10 PValue
KEGG_PATHWAY	hsa05200:Pathways in cancer	50	25.641	3.74663e-19	RET, ALK, GSK3B, FLT3, EDNRA, CASP8, EDNRB, CASP3, AKT2, JAK2, HSP90AA1, GSTO1, MMP2, F2, MMP9, RHOA, TGFBR1, TGFBR2, KIT, PPARG, TP53, PPARD, GSTP1, PTGS2, HIF1A, EGFR, RELA, CDC42, MAPK8, TERT, ERBB2, HMOX1, MAPK1, MAPK3, NQO1, GSTM2, JUN, GSTM1, NOS2, STAT1, IGF1, ESR1, MTOR, IL2, VEGFA, IL6, CDK4, GSTA1, BCL2, MDM2	183	531	8465	4.35563	1.03782e-16	5.25706e-17	2.25845e-17	18.4264
KEGG_PATHWAY	hsa04933:AGE-RAGE signaling pathway in diabetic complications	25	12.8205	3.79571e-19	TNF, RELA, CDC42, MAPK8, CASP3, AKT2, MAPK1, JAK2, MAPK3, JUN, NOS3, STAT1, MMP2, PRKCD, MAPK14, SELE, F3, TGFBR1, TGFBR2, VEGFA, IL6, CDK4, IL1B, BCL2, NOX4	183	100	8465	11.5642	1.05141e-16	5.25706e-17	2.25845e-17	18.4207
KEGG_PATHWAY	hsa05418:Fluid shear stress and atherosclerosis	27	13.8462	8.96788e-18	GSTP1, ITGB3, PLAT, TNF, RELA, MAPK8, AKT2, KDR, HMOX1, MAP3K5, NQO1, GSTM2, JUN, HSP90AA1, GSTM1, GSTO1, NOS3, MMP2, MAPK14, SELE, MMP9, RHOA, VEGFA, IL1B, GSTA1, BCL2, TP53	183	139	8465	8.98514	2.4841e-15	8.28034e-16	3.55726e-16	17.0473
KEGG_PATHWAY	hsa05417:Lipid and atherosclerosis	31	15.8974	1.1138e-16	GSK3B, ITPR1, TNF, RELA, CDC42, MAPK8, CASP8, CASP3, CCL5, AKT2, MAPK1, JAK2, MAPK3, MAP3K5, JUN, HSP90AA1, HSPA5, NOS3, MAPK14, SOD2, SELE, MMP9, RHOA, ERN1, CYP2C9, CYP2C8, IL6, IL1B, BCL2, PPARG, TP53	183	215	8465	6.66959	3.07532e-14	7.71307e-15	3.31356e-15	15.9532
KEGG_PATHWAY	hsa00982:Drug metabolism - cytochrome P450	16	8.20513	2.15733e-11	GSTK1, GSTM2, GSTM1, MAOB, ADH1C, MAOA, GSTO1, ADH1B, GSTP1, ADH1A, CYP3A4, CYP2C19, CYP2C9, CYP2C8, GSTA1, UGT2B7	183	72	8465	10.2793	5.9758e-09	1.19516e-09	5.13444e-10	10.6661
KEGG_PATHWAY	hsa05208:Chemical carcinogenesis - reactive oxygen species	25	12.8205	5.40155e-11	AHR, HIF1A, RELA, EGFR, MAPK8, AKT2, HMOX1, MAPK1, MAPK3, MAP3K5, NQO1, PTPN1, GSTM2, JUN, GSTM1, GSTO1, EPHX2, PRKCD, AKR1A1, MAPK14, SOD2, VEGFA, CAT, GSTA1, NOX4	183	223	8465	5.18574	1.49623e-08	2.2595e-09	9.70686e-10	10.2675
KEGG_PATHWAY	hsa04625:C-type lectin receptor signaling pathway	18	9.23077	5.70992e-11	JUN, STAT1, PRKCD, ITPR1, PTGS2, MAPK14, TNF, RHOA, IL2, RELA, IL6, MAPK8, CASP8, IL1B, AKT2, MDM2, MAPK1, MAPK3	183	104	8465	8.00599	1.58165e-08	2.2595e-09	9.70686e-10	10.2434
KEGG_PATHWAY	hsa04657:IL-17 signaling pathway	17	8.71795	1.14516e-10	GSK3B, JUN, HSP90AA1, PTGS2, MAPK14, TNF, MMP9, RELA, IL6, MAPK8, CASP8, IL1B, CASP3, LCN2, MAPK1, S100A9, MAPK3	183	94	8465	8.3656	3.17209e-08	3.68565e-09	1.58336e-09	9.94113
KEGG_PATHWAY	hsa05207:Chemical carcinogenesis - receptor activation	24	12.3077	1.1975e-10	GSTM2, JUN, HSP90AA1, GSTM1, GSTO1, VDR, EPHX2, NR1I3, AHR, CYP3A4, ESR1, EGFR, MTOR, RELA, VEGFA, ADRB3, AKT2, GSTA1, BCL2, MAPK1, JAK2, PPARA, UGT2B7, MAPK3	183	212	8465	5.23662	3.31708e-08	3.68565e-09	1.58336e-09	9.92172
KEGG_PATHWAY	hsa05215:Prostate cancer	17	8.71795	1.87083e-10	GSK3B, HSP90AA1, GSTP1, PLAT, IGF1, MMP9, EGFR, MTOR, RELA, PLAU, AKT2, ERBB2, MDM2, BCL2, MAPK1, TP53, MAPK3	183	97	8465	8.10687	5.18219e-08	5.18219e-09	2.22628e-09	9.72797
KEGG_PATHWAY	hsa01522:Endocrine resistance	17	8.71795	2.19439e-10	JUN, MMP2, IGF1, MAPK14, ESR1, MMP9, EGFR, MTOR, MAPK8, CDK4, AKT2, ERBB2, MDM2, BCL2, MAPK1, TP53, MAPK3	183	98	8465	8.02414	6.07845e-08	5.52587e-09	2.37393e-09	9.65869
KEGG_PATHWAY	hsa01524:Platinum drug resistance	15	7.69231	3.34087e-10	GSTM2, GSTM1, GSTO1, GSTP1, CASP8, CASP3, AKT2, ERBB2, GSTA1, MDM2, BCL2, MAPK1, TP53, MAP3K5, MAPK3	183	73	8465	9.50483	9.2542e-08	7.71184e-09	3.31303e-09	9.47614
KEGG_PATHWAY	hsa05205:Proteoglycans in cancer	23	11.7949	3.87069e-10	ITGB3, MMP2, ITPR1, IGF1, MAPK14, HIF1A, ESR1, TNF, MMP9, RHOA, EGFR, MTOR, VEGFA, CDC42, PLAU, CASP3, AKT2, ERBB2, MDM2, KDR, MAPK1, TP53, MAPK3	183	205	8465	5.18979	1.07218e-07	8.06146e-09	3.46323e-09	9.41221
KEGG_PATHWAY	hsa05142:Chagas disease	17	8.71795	4.07439e-10	JUN, ACE, NOS2, MAPK14, TNF, TGFBR1, IL2, RELA, TGFBR2, IL6, MAPK8, CASP8, IL1B, CCL5, AKT2, MAPK1, MAPK3	183	102	8465	7.70947	1.1286e-07	8.06146e-09	3.46323e-09	9.38994
KEGG_PATHWAY	hsa05212:Pancreatic cancer	15	7.69231	5.87033e-10	STAT1, EGFR, TGFBR1, MTOR, RELA, TGFBR2, VEGFA, CDC42, MAPK8, CDK4, AKT2, ERBB2, MAPK1, TP53, MAPK3	183	76	8465	9.12964	1.62608e-07	1.08405e-08	4.65713e-09	9.23134
KEGG_PATHWAY	hsa04659:Th17 cell differentiation	17	8.71795	9.77157e-10	JUN, HSP90AA1, STAT1, AHR, MAPK14, HIF1A, TGFBR1, IL2, MTOR, RELA, TGFBR2, IL6, MAPK8, IL1B, MAPK1, JAK2, MAPK3	183	108	8465	7.28117	2.70672e-07	1.6917e-08	7.2676e-09	9.01004
KEGG_PATHWAY	hsa04066:HIF-1 signaling pathway	17	8.71795	1.12402e-09	FLT1, NOS2, NOS3, INSR, IGF1, HIF1A, EGFR, MTOR, RELA, VEGFA, IL6, AKT2, ERBB2, BCL2, HMOX1, MAPK1, MAPK3	183	109	8465	7.21437	3.11352e-07	1.7682e-08	7.59622e-09	8.94923
KEGG_PATHWAY	hsa04010:MAPK signaling pathway	27	13.8462	1.14901e-09	RET, FLT1, FLT3, TNF, RELA, EGFR, CDC42, MAPK8, CASP3, AKT2, ERBB2, KDR, MAPK1, MAPK3, MAP3K5, JUN, INSR, IGF1, MAPK14, TGFBR1, TGFBR2, CDC25B, VEGFA, IL1B, KIT, MAPT, TP53	183	302	8465	4.13554	3.18275e-07	1.7682e-08	7.59622e-09	8.93968
KEGG_PATHWAY	hsa01100:Metabolic pathways	68	34.8718	1.54341e-09	EHMT2, PYGL, COMT, PIK3CG, ALAD, PNP, CA3, ANPEP, FPGS, DNMT3B, GLUL, FADS1, GSTK1, ST6GAL1, G6PD, GSTO1, ARG1, AKR1A1, NME2, SORD, MIF, SULT2B1, CAT, BLVRB, HPRT1, LAP3, TKT, UGT2B7, PTGES, DNMT1, MAOB, FECH, ADH1C, MAOA, ADH1B, GSTP1, GLO1, ADH1A, ODC1, HMGCR, TYMS, CYP2C19, CYP3A4, PTGS2, CYP17A1, TYMP, SULT1E1, ALOX5, HMOX1, XDH, HAO2, FDFT1, NQO1, GSTM2, GSTM1, NOS2, NOS3, EPHX2, GSS, GSR, D…	183	1541	8465	2.04118	4.27524e-07	2.25013e-08	9.66662e-09	8.81152
KEGG_PATHWAY	hsa04668:TNF signaling pathway	17	8.71795	2.21252e-09	JUN, PTGS2, MAPK14, SELE, TNF, MMP9, RELA, IL6, MAPK8, CASP8, IL1B, CASP3, CCL5, AKT2, MAPK1, MAP3K5, MAPK3	183	114	8465	6.89795	6.12868e-07	3.04108e-08	1.30646e-08	8.65511
KEGG_PATHWAY	hsa05163:Human cytomegalovirus infection	23	11.7949	2.30551e-09	GSK3B, ITGB3, ITPR1, PTGS2, MAPK14, TNF, RHOA, EGFR, MTOR, RELA, VEGFA, IL6, CASP8, CDK4, IL1B, CASP3, CCL5, AKT2, CXCR2, MDM2, MAPK1, TP53, MAPK3	183	225	8465	4.72848	6.38626e-07	3.04108e-08	1.30646e-08	8.63723
KEGG_PATHWAY	hsa05167:Kaposi sarcoma-associated herpesvirus infection	21	10.7692	5.22179e-09	GSK3B, JUN, STAT1, ITPR1, PTGS2, MAPK14, HIF1A, MTOR, PIK3CG, RELA, VEGFA, IL6, MAPK8, CASP8, CDK4, CASP3, AKT2, MAPK1, JAK2, TP53, MAPK3	183	194	8465	5.00718	1.44643e-06	6.57471e-08	2.82451e-08	8.28218
KEGG_PATHWAY	hsa04151:PI3K-Akt signaling pathway	28	14.359	7.61637e-09	GSK3B, FLT1, FLT3, ITGB3, RELA, EGFR, PIK3CG, AKT2, ERBB2, KDR, MAPK1, JAK2, MCL1, MAPK3, HSP90AA1, ITGA4, NOS3, INSR, IGF1, IL2, MTOR, VEGFA, IL6, CDK4, KIT, BCL2, MDM2, TP53	183	354	8465	3.65873	2.10973e-06	8.87065e-08	3.81086e-08	8.11825
KEGG_PATHWAY	hsa01523:Antifolate resistance	10	5.12821	7.81231e-09	DHFR, IL6, ABCC1, IL1B, FPGS, TYMS, TNF, RELA, SLC19A1, ABCG2	183	30	8465	15.4189	2.16401e-06	8.87065e-08	3.81086e-08	8.10722
KEGG_PATHWAY	hsa04936:Alcoholic liver disease	18	9.23077	8.21667e-09	GSK3B, CPT1A, ADH1C, ADH1B, ADH1A, MAPK14, TNF, RELA, FABP1, IL6, MAPK8, CASP8, IL1B, CASP3, AKT2, NOX4, PPARA, MAP3K5	183	142	8465	5.86354	2.27602e-06	8.87065e-08	3.81086e-08	8.0853
KEGG_PATHWAY	hsa04931:Insulin resistance	16	8.20513	8.32624e-09	PTPN1, GSK3B, CPT1A, NOS3, NR1H2, INSR, PRKCD, NR1H3, PYGL, TNF, MTOR, RELA, IL6, MAPK8, AKT2, PPARA	183	108	8465	6.85286	2.30637e-06	8.87065e-08	3.81086e-08	8.07955
KEGG_PATHWAY	hsa05219:Bladder cancer	11	5.64103	1.0375e-08	CDK4, MMP2, ERBB2, MDM2, MAPK1, TP53, MMP9, EGFR, TYMP, MAPK3, VEGFA	183	41	8465	12.4104	2.87388e-06	1.0644e-07	4.5727e-08	7.98401
KEGG_PATHWAY	hsa00983:Drug metabolism - other enzymes	14	7.17949	1.22536e-08	GSTM2, GSTM1, GSTO1, GSTP1, NME2, CYP3A4, MPO, TYMP, GSTA1, HPRT1, XDH, UGT2B7, CES2, CES1	183	80	8465	8.09495	3.39425e-06	1.21224e-07	5.2078e-08	7.91173
KEGG_PATHWAY	hsa05204:Chemical carcinogenesis - DNA adducts	13	6.66667	2.05719e-08	GSTK1, GSTM2, GSTM1, GSTO1, GSTP1, CYP3A4, PTGS2, CYP2C19, SULT1A1, CYP2C9, CYP2C8, GSTA1, UGT2B7	183	69	8465	8.71506	5.69839e-06	1.96497e-07	8.44156e-08	7.68673
KEGG_PATHWAY	hsa00480:Glutathione metabolism	12	6.15385	2.61964e-08	GSTK1, GSTM2, G6PD, GSTM1, GSTO1, ANPEP, GSTP1, GSS, GSR, ODC1, GSTA1, LAP3	183	57	8465	9.73828	7.25639e-06	2.4188e-07	1.03913e-07	7.58176
KEGG_PATHWAY	hsa04210:Apoptosis	17	8.71795	2.96974e-08	JUN, PARP1, ITPR1, TNF, RELA, ERN1, MAPK8, CASP8, CASP3, AKT2, BCL2, CASP2, MAPK1, TP53, MCL1, MAP3K5, MAPK3	183	136	8465	5.7821	8.22614e-06	2.61437e-07	1.12314e-07	7.52728
KEGG_PATHWAY	hsa05210:Colorectal cancer	14	7.17949	3.02426e-08	GSK3B, JUN, RHOA, EGFR, TGFBR1, MTOR, TGFBR2, MAPK8, CASP3, AKT2, BCL2, MAPK1, TP53, MAPK3	183	86	8465	7.53018	8.37717e-06	2.61437e-07	1.12314e-07	7.51938
KEGG_PATHWAY	hsa04932:Non-alcoholic fatty liver disease	18	9.23077	3.11459e-08	GSK3B, JUN, INSR, NR1H3, MAPK14, TNF, RELA, ERN1, CDC42, IL6, MAPK8, CASP8, IL1B, CASP3, AKT2, PPARG, PPARA, MAP3K5	183	155	8465	5.37176	8.62738e-06	2.61437e-07	1.12314e-07	7.5066
KEGG_PATHWAY	hsa05161:Hepatitis B	18	9.23077	6.0293e-08	JUN, STAT1, MAPK14, TNF, MMP9, TGFBR1, RELA, TGFBR2, IL6, MAPK8, CASP8, CASP3, AKT2, BCL2, MAPK1, JAK2, TP53, MAPK3	183	162	8465	5.13965	1.6701e-05	4.91211e-07	2.11025e-07	7.21973
KEGG_PATHWAY	hsa04926:Relaxin signaling pathway	16	8.20513	9.59075e-08	JUN, NOS2, NOS3, MMP2, MAPK14, MMP9, EGFR, TGFBR1, RELA, TGFBR2, VEGFA, MAPK8, EDNRB, AKT2, MAPK1, MAPK3	183	129	8465	5.73728	2.6566e-05	7.59039e-07	3.26085e-07	7.01815
KEGG_PATHWAY	hsa01521:EGFR tyrosine kinase inhibitor resistance	13	6.66667	9.91021e-08	GSK3B, IGF1, EGFR, MTOR, VEGFA, IL6, AKT2, ERBB2, KDR, BCL2, MAPK1, JAK2, MAPK3	183	79	8465	7.61188	2.74509e-05	7.61552e-07	3.27165e-07	7.00392
KEGG_PATHWAY	hsa05225:Hepatocellular carcinoma	18	9.23077	1.03677e-07	NQO1, GSK3B, GSTM2, GSTM1, GSTO1, GSTP1, EGFR, TGFBR1, MTOR, TGFBR2, TERT, CDK4, AKT2, GSTA1, HMOX1, MAPK1, TP53, MAPK3	183	168	8465	4.95609	2.8718e-05	7.61552e-07	3.27165e-07	6.98432
KEGG_PATHWAY	hsa05145:Toxoplasmosis	15	7.69231	1.04473e-07	NOS2, STAT1, MAPK14, TNF, PIK3CG, RELA, MAPK8, CASP8, CASP3, AKT2, ALOX5, BCL2, MAPK1, JAK2, MAPK3	183	112	8465	6.19511	2.89385e-05	7.61552e-07	3.27165e-07	6.981
KEGG_PATHWAY	hsa05230:Central carbon metabolism in cancer	12	6.15385	2.40974e-07	RET, G6PD, FLT3, AKT2, ERBB2, KIT, MAPK1, HIF1A, TP53, EGFR, MTOR, MAPK3	183	70	8465	7.92974	6.67476e-05	1.71153e-06	7.3528e-07	6.61803
KEGG_PATHWAY	hsa05133:Pertussis	12	6.15385	5.70195e-07	IL6, JUN, MAPK8, NOS2, IL1B, CASP3, MAPK1, MAPK14, TNF, RELA, RHOA, MAPK3	183	76	8465	7.30371	0.000157932	3.9486e-06	1.69633e-06	6.24398
KEGG_PATHWAY	hsa05140:Leishmaniasis	12	6.15385	6.52922e-07	JUN, NOS2, ITGA4, STAT1, IL1B, MAPK1, JAK2, MAPK14, PTGS2, TNF, RELA, MAPK3	183	77	8465	7.20886	0.000180843	4.41121e-06	1.89507e-06	6.18514
KEGG_PATHWAY	hsa05206:MicroRNAs in cancer	23	11.7949	7.36274e-07	ABCC1, DNMT1, ABCB1, ITGB3, CDC25C, PTGS2, MMP9, RHOA, EGFR, MTOR, CDC25B, VEGFA, PLAU, CASP3, ERBB2, MDM2, BCL2, DNMT3B, HMOX1, MAPK1, TP53, MCL1, MAPK3	183	310	8465	3.43196	0.000203927	4.806e-06	2.06467e-06	6.13296
KEGG_PATHWAY	hsa00980:Metabolism of xenobiotics by cytochrome P450	12	6.15385	7.46058e-07	GSTK1, CYP2C9, GSTM2, GSTM1, ADH1C, GSTO1, ADH1B, GSTP1, ADH1A, GSTA1, CYP3A4, UGT2B7	183	78	8465	7.11644	0.000206637	4.806e-06	2.06467e-06	6.12723
KEGG_PATHWAY	hsa05135:Yersinia infection	15	7.69231	1.28797e-06	GSK3B, JUN, ITGA4, MAPK14, TNF, RHOA, IL2, RELA, CDC42, IL6, MAPK8, IL1B, AKT2, MAPK1, MAPK3	183	137	8465	5.06462	0.000356705	8.10836e-06	3.48338e-06	5.89009
KEGG_PATHWAY	hsa05131:Shigellosis	20	10.2564	1.33577e-06	GSK3B, JUN, PRKCD, ITPR1, MAPK14, TNF, RHOA, EGFR, MTOR, RELA, CDC42, MAPK8, IL1B, CCL5, AKT2, MDM2, BCL2, MAPK1, TP53, MAPK3	183	247	8465	3.74549	0.00036994	8.2224e-06	3.53237e-06	5.87427
KEGG_PATHWAY	hsa05152:Tuberculosis	17	8.71795	1.45419e-06	NOS2, STAT1, VDR, MAPK14, TNF, RHOA, RELA, IL6, MAPK8, CASP8, IL1B, CASP3, AKT2, BCL2, MAPK1, JAK2, MAPK3	183	180	8465	4.3687	0.000402729	8.61624e-06	3.70156e-06	5.83738
KEGG_PATHWAY	hsa04722:Neurotrophin signaling pathway	14	7.17949	1.46196e-06	GSK3B, JUN, PRKCD, MAPK14, RHOA, RELA, CDC42, MAPK8, AKT2, BCL2, MAPK1, TP53, MAP3K5, MAPK3	183	119	8465	5.44198	0.000404881	8.61624e-06	3.70156e-06	5.83506
KEGG_PATHWAY	hsa05415:Diabetic cardiomyopathy	18	9.23077	1.55244e-06	GSK3B, G6PD, ACE, PARP1, NOS3, MMP2, INSR, PRKCD, GSR, MAPK14, MMP9, TGFBR1, MTOR, RELA, TGFBR2, MAPK8, AKT2, PPARA	183	203	8465	4.10159	0.000429934	8.95887e-06	3.84876e-06	5.80899
KEGG_PATHWAY	hsa04071:Sphingolipid signaling pathway	14	7.17949	1.76937e-06	ABCC1, NOS3, MAPK14, TNF, RHOA, RELA, MAPK8, ADORA3, AKT2, BCL2, MAPK1, TP53, MAP3K5, MAPK3	183	121	8465	5.35203	0.000489996	1.00024e-05	4.29704e-06	5.75218
KEGG_PATHWAY	hsa04660:T cell receptor signaling pathway	13	6.66667	2.09524e-06	GSK3B, JUN, MAPK14, TNF, RHOA, IL2, RELA, CDC42, MAPK8, CDK4, AKT2, MAPK1, MAPK3	183	104	8465	5.7821	0.000580214	1.138e-05	4.8889e-06	5.67877
KEGG_PATHWAY	hsa04620:Toll-like receptor signaling pathway	13	6.66667	2.09524e-06	JUN, STAT1, MAPK14, TNF, RELA, IL6, MAPK8, CASP8, IL1B, CCL5, AKT2, MAPK1, MAPK3	183	104	8465	5.7821	0.000580214	1.138e-05	4.8889e-06	5.67877
KEGG_PATHWAY	hsa04917:Prolactin signaling pathway	11	5.64103	2.13973e-06	GSK3B, MAPK8, STAT1, AKT2, MAPK1, JAK2, MAPK14, ESR1, RELA, CYP17A1, MAPK3	183	70	8465	7.26893	0.000592529	1.13982e-05	4.89668e-06	5.66964
KEGG_PATHWAY	hsa04621:NOD-like receptor signaling pathway	17	8.71795	2.24493e-06	JUN, HSP90AA1, STAT1, PRKCD, ITPR1, MAPK14, TNF, RHOA, RELA, IL6, MAPK8, CASP8, IL1B, CCL5, BCL2, MAPK1, MAPK3	183	186	8465	4.22777	0.000621654	1.1733e-05	5.04051e-06	5.6488
KEGG_PATHWAY	hsa05235:PD-L1 expression and PD-1 checkpoint pathway in cancer	12	6.15385	2.85254e-06	ALK, JUN, STAT1, AKT2, MAPK1, JAK2, MAPK14, HIF1A, RELA, EGFR, MTOR, MAPK3	183	89	8465	6.23688	0.000789842	1.46325e-05	6.28615e-06	5.54477
KEGG_PATHWAY	hsa04380:Osteoclast differentiation	14	7.17949	3.34809e-06	JUN, STAT1, ITGB3, MAPK14, TNF, TGFBR1, RELA, TGFBR2, MAPK8, IL1B, AKT2, MAPK1, PPARG, MAPK3	183	128	8465	5.05934	0.000926993	1.68622e-05	7.24405e-06	5.4752
KEGG_PATHWAY	hsa04068:FoxO signaling pathway	14	7.17949	4.34177e-06	INSR, IGF1, MAPK14, SOD2, EGFR, TGFBR1, TGFBR2, IL6, MAPK8, AKT2, CAT, MDM2, MAPK1, MAPK3	183	131	8465	4.94348	0.00120195	2.14763e-05	9.22626e-06	5.36233
KEGG_PATHWAY	hsa04218:Cellular senescence	15	7.69231	6.05711e-06	ITPR1, MAPK14, TGFBR1, MTOR, RELA, TGFBR2, IL6, CDK4, AKT2, CHEK1, MDM2, CDK1, MAPK1, TP53, MAPK3	183	156	8465	4.44777	0.00167642	2.94354e-05	1.26455e-05	5.21773
KEGG_PATHWAY	hsa04510:Focal adhesion	17	8.71795	7.01059e-06	GSK3B, JUN, FLT1, ITGA4, ITGB3, IGF1, RHOA, EGFR, VEGFA, CDC42, MAPK8, AKT2, ERBB2, KDR, BCL2, MAPK1, MAPK3	183	203	8465	3.87372	0.00194006	3.34816e-05	1.43838e-05	5.15425
KEGG_PATHWAY	hsa04915:Estrogen signaling pathway	14	7.17949	7.73768e-06	JUN, HSP90AA1, NOS3, MMP2, PRKCD, ITPR1, OPRM1, ESR1, MMP9, EGFR, AKT2, BCL2, MAPK1, MAPK3	183	138	8465	4.69272	0.00214105	3.63278e-05	1.56065e-05	5.11139
KEGG_PATHWAY	hsa05162:Measles	14	7.17949	8.37762e-06	GSK3B, JUN, STAT1, IL2, RELA, IL6, MAPK8, CASP8, CDK4, IL1B, CASP3, AKT2, BCL2, TP53	183	139	8465	4.65896	0.00231792	3.86767e-05	1.66156e-05	5.07688
KEGG_PATHWAY	hsa05160:Hepatitis C	14	7.17949	3.11793e-05	GSK3B, STAT1, NR1H3, TNF, EGFR, RELA, CASP8, CDK4, CASP3, AKT2, MAPK1, PPARA, TP53, MAPK3	183	157	8465	4.12481	0.00859961	0.000141585	6.08252e-05	4.50613
KEGG_PATHWAY	hsa04370:VEGF signaling pathway	9	4.61538	3.40191e-05	CDC42, NOS3, AKT2, KDR, MAPK1, MAPK14, PTGS2, MAPK3, VEGFA	183	59	8465	7.05613	0.00937919	0.000150494	6.46525e-05	4.46828
KEGG_PATHWAY	hsa04726:Serotonergic synapse	12	6.15385	3.42278e-05	CYP2C9, CYP2C8, MAOB, MAOA, ALOX5, CASP3, ITPR1, MAPK1, HTR2C, CYP2C19, PTGS2, MAPK3	183	115	8465	4.8268	0.00943646	0.000150494	6.46525e-05	4.46562
KEGG_PATHWAY	hsa05170:Human immunodeficiency virus 1 infection	16	8.20513	4.88688e-05	JUN, ITPR1, CDC25C, MAPK14, TNF, MTOR, RELA, MAPK8, CASP8, CASP3, AKT2, CHEK1, BCL2, CDK1, MAPK1, MAPK3	183	212	8465	3.49108	0.0134458	0.00021151	9.08655e-05	4.31097
KEGG_PATHWAY	hsa05224:Breast cancer	13	6.66667	7.2728e-05	GSK3B, JUN, IGF1, ESR1, EGFR, MTOR, CDK4, AKT2, KIT, ERBB2, MAPK1, TP53, MAPK3	183	147	8465	4.09074	0.0199448	0.000309933	0.000133148	4.1383
KEGG_PATHWAY	hsa05164:Influenza A	14	7.17949	7.58752e-05	STAT1, PLG, TNF, RELA, IL6, CASP8, CDK4, IL1B, CASP3, CCL5, AKT2, MAPK1, JAK2, MAPK3	183	171	8465	3.78711	0.0207989	0.000318446	0.000136805	4.1199
KEGG_PATHWAY	hsa05226:Gastric cancer	13	6.66667	8.29229e-05	GSK3B, ABCB1, EGFR, TGFBR1, MTOR, TGFBR2, TERT, AKT2, ERBB2, BCL2, MAPK1, TP53, MAPK3	183	149	8465	4.03583	0.0227088	0.00034283	0.000147281	4.08133
KEGG_PATHWAY	hsa05165:Human papillomavirus infection	20	10.2564	8.64246e-05	GSK3B, ITGA4, STAT1, ITGB3, PTGS2, TNF, EGFR, MTOR, RELA, VEGFA, CDC42, CASP8, TERT, CDK4, CASP3, AKT2, MDM2, MAPK1, TP53, MAPK3	183	331	8465	2.79497	0.0236564	0.000344013	0.000147789	4.06336
KEGG_PATHWAY	hsa05221:Acute myeloid leukemia	9	4.61538	8.64307e-05	FLT3, AKT2, KIT, MAPK1, MPO, RELA, MTOR, PPARD, MAPK3	183	67	8465	6.2136	0.023658	0.000344013	0.000147789	4.06333
KEGG_PATHWAY	hsa05132:Salmonella infection	17	8.71795	8.69347e-05	JUN, HSP90AA1, MAPK14, TNF, RHOA, PIK3CG, RELA, CDC42, IL6, MAPK8, CASP8, IL1B, CASP3, AKT2, BCL2, MAPK1, MAPK3	183	249	8465	3.1581	0.0237943	0.000344013	0.000147789	4.06081
KEGG_PATHWAY	hsa00350:Tyrosine metabolism	7	3.58974	0.0001036	MAOB, ADH1C, MAOA, ADH1B, ADH1A, MIF, COMT	183	36	8465	8.99438	0.0282907	0.000404185	0.000173639	3.98464
KEGG_PATHWAY	hsa04211:Longevity regulating pathway	10	5.12821	0.000116584	AKT2, EHMT2, INSR, CAT, PPARG, IGF1, SOD2, TP53, RELA, MTOR	183	89	8465	5.1974	0.0317798	0.000448526	0.000192688	3.93336
KEGG_PATHWAY	hsa05120:Epithelial cell signaling in Helicobacter pylori infection	9	4.61538	0.00011842	CDC42, JUN, MAPK8, CCL5, CASP3, CXCR2, MAPK14, RELA, EGFR	183	70	8465	5.94731	0.032272	0.000449347	0.000193041	3.92658
KEGG_PATHWAY	hsa05223:Non-small cell lung cancer	9	4.61538	0.00014475	RET, ALK, CDK4, AKT2, ERBB2, MAPK1, TP53, EGFR, MAPK3	183	72	8465	5.7821	0.0393053	0.000541833	0.000232773	3.83938
KEGG_PATHWAY	hsa04912:GnRH signaling pathway	10	5.12821	0.000163887	CDC42, JUN, MAPK8, MMP2, PRKCD, ITPR1, MAPK1, MAPK14, EGFR, MAPK3	183	93	8465	4.97385	0.0443853	0.000597326	0.000256613	3.78545
KEGG_PATHWAY	hsa04520:Adherens junction	10	5.12821	0.000163887	CDC42, PTPN1, INSR, ERBB2, MAPK1, RHOA, EGFR, TGFBR1, TGFBR2, MAPK3	183	93	8465	4.97385	0.0443853	0.000597326	0.000256613	3.78545
KEGG_PATHWAY	hsa04115:p53 signaling pathway	9	4.61538	0.000175729	CASP8, CDK4, CASP3, CHEK1, MDM2, BCL2, CDK1, IGF1, TP53	183	74	8465	5.62583	0.0475153	0.000632168	0.000271581	3.75516
KEGG_PATHWAY	hsa05214:Glioma	9	4.61538	0.000193151	CDK4, AKT2, MDM2, MAPK1, IGF1, TP53, EGFR, MTOR, MAPK3	183	75	8465	5.55082	0.0521016	0.000685933	0.000294679	3.7141
KEGG_PATHWAY	hsa05220:Chronic myeloid leukemia	9	4.61538	0.000211968	CDK4, AKT2, MDM2, MAPK1, TP53, RELA, TGFBR1, TGFBR2, MAPK3	183	76	8465	5.47778	0.0570304	0.000743228	0.000319293	3.67373
KEGG_PATHWAY	hsa04062:Chemokine signaling pathway	14	7.17949	0.000243901	GSK3B, STAT1, PRKCD, RHOA, PIK3CG, RELA, CDC42, CCL5, AKT2, CXCR2, MAPK1, JAK2, CCR2, MAPK3	183	192	8465	3.37289	0.0653367	0.000844508	0.000362803	3.61279
KEGG_PATHWAY	hsa04935:Growth hormone synthesis, secretion and action	11	5.64103	0.000247597	GSK3B, MAPK8, STAT1, AKT2, ITPR1, MAPK1, IGF1, JAK2, MAPK14, MTOR, MAPK3	183	120	8465	4.24021	0.0662931	0.000846719	0.000363753	3.60626
KEGG_PATHWAY	hsa05202:Transcriptional misregulation in cancer	14	7.17949	0.000256556	FLT1, FLT3, PLAT, IGF1, MPO, MMP9, RELA, TGFBR2, CDK9, IL6, PLAU, MDM2, PPARG, TP53	183	193	8465	3.35542	0.0686081	0.000866659	0.000372319	3.59082
KEGG_PATHWAY	hsa04919:Thyroid hormone signaling pathway	11	5.64103	0.000264954	GSK3B, STAT1, AKT2, ITGB3, MDM2, MAPK1, HIF1A, ESR1, TP53, MTOR, MAPK3	183	121	8465	4.20517	0.0707729	0.000884245	0.000379874	3.57683
KEGG_PATHWAY	hsa05166:Human T-cell leukemia virus 1 infection	15	7.69231	0.000294344	JUN, TNF, TGFBR1, IL2, RELA, TGFBR2, IL6, MAPK8, TERT, CDK4, AKT2, CHEK1, MAPK1, TP53, MAPK3	183	222	8465	3.12546	0.0783091	0.000970635	0.000416988	3.53114
KEGG_PATHWAY	hsa05130:Pathogenic Escherichia coli infection	14	7.17949	0.000315912	JUN, F2, MAPK14, TNF, RHOA, RELA, CDC42, IL6, MAPK8, CASP8, IL1B, CASP3, MAPK1, MAPK3	183	197	8465	3.28729	0.0838007	0.0010295	0.000442276	3.50043
KEGG_PATHWAY	hsa04611:Platelet activation	11	5.64103	0.000323262	TBXA2R, NOS3, AKT2, ITGB3, ITPR1, MAPK1, F2, MAPK14, RHOA, PIK3CG, MAPK3	183	124	8465	4.10343	0.0856647	0.0010412	0.000447304	3.49045
KEGG_PATHWAY	hsa04914:Progesterone-mediated oocyte maturation	10	5.12821	0.000330705	HSP90AA1, MAPK8, AKT2, CDK1, MAPK1, IGF1, CDC25C, MAPK14, CDC25B, MAPK3	183	102	8465	4.53498	0.0875487	0.00105294	0.000452344	3.48056
KEGG_PATHWAY	hsa05169:Epstein-Barr virus infection	14	7.17949	0.000399567	JUN, STAT1, MAPK14, TNF, RELA, IL6, MAPK8, CASP8, CDK4, CASP3, AKT2, MDM2, BCL2, TP53	183	202	8465	3.20592	0.104795	0.00125773	0.000540323	3.39841
KEGG_PATHWAY	hsa04930:Type II diabetes mellitus	7	3.58974	0.000416942	MAPK8, INSR, PRKCD, MAPK1, TNF, MTOR, MAPK3	183	46	8465	7.03908	0.109095	0.00129767	0.000557484	3.37992
KEGG_PATHWAY	hsa04012:ErbB signaling pathway	9	4.61538	0.000459062	GSK3B, JUN, MAPK8, AKT2, ERBB2, MAPK1, EGFR, MTOR, MAPK3	183	85	8465	4.89778	0.119433	0.00141289	0.000606982	3.33813
KEGG_PATHWAY	hsa05022:Pathways of neurodegeneration - multiple diseases	23	11.7949	0.000538612	GSK3B, NOS2, HSPA5, LRRK2, ITPR1, PTGS2, MAPK14, TNF, MTOR, RELA, ERN1, IL6, MAPK8, CASP8, IL1B, CASP3, CAT, BCL2, NOX4, MAPK1, MAPT, MAP3K5, MAPK3	183	476	8465	2.2351	0.138634	0.00163951	0.000704339	3.26872
KEGG_PATHWAY	hsa04014:Ras signaling pathway	15	7.69231	0.000549391	FLT1, FLT3, INSR, IGF1, RHOA, EGFR, RELA, VEGFA, CDC42, MAPK8, AKT2, KIT, KDR, MAPK1, MAPK3	183	236	8465	2.94005	0.141203	0.00165414	0.000710625	3.26012
KEGG_PATHWAY	hsa05010:Alzheimer disease	20	10.2564	0.000577763	GSK3B, NOS2, INSR, ITPR1, PTGS2, TNF, MTOR, RELA, ERN1, IL6, MAPK8, CASP8, IL1B, CASP3, AKT2, NOX4, MAPK1, MAPT, MAP3K5, MAPK3	183	384	8465	2.40921	0.14793	0.00170572	0.000732781	3.23825
KEGG_PATHWAY	hsa04015:Rap1 signaling pathway	14	7.17949	0.000578835	FLT1, ITGB3, INSR, IGF1, MAPK14, RHOA, EGFR, VEGFA, CDC42, AKT2, KIT, KDR, MAPK1, MAPK3	183	210	8465	3.08379	0.148183	0.00170572	0.000732781	3.23745
KEGG_PATHWAY	hsa00330:Arginine and proline metabolism	7	3.58974	0.000658821	MAOB, NOS2, MAOA, NOS3, ARG1, ODC1, LAP3	183	50	8465	6.47596	0.16686	0.00191382	0.000822183	3.18123
KEGG_PATHWAY	hsa04920:Adipocytokine signaling pathway	8	4.10256	0.000663274	CPT1A, MAPK8, AKT2, JAK2, PPARA, TNF, RELA, MTOR	183	69	8465	5.36311	0.167888	0.00191382	0.000822183	3.17831
KEGG_PATHWAY	hsa04658:Th1 and Th2 cell differentiation	9	4.61538	0.000781601	JUN, MAPK8, STAT1, MAPK1, JAK2, MAPK14, RELA, IL2, MAPK3	183	92	8465	4.52512	0.194738	0.00223199	0.000958871	3.10702
KEGG_PATHWAY	hsa05218:Melanoma	8	4.10256	0.00085799	CDK4, AKT2, MDM2, MAPK1, IGF1, TP53, EGFR, MAPK3	183	72	8465	5.13965	0.211612	0.00242514	0.00104185	3.06652
KEGG_PATHWAY	hsa04022:cGMP-PKG signaling pathway	12	6.15385	0.000922613	EDNRA, EDNRB, ADRB3, NOS3, AKT2, INSR, ADORA3, ITPR1, MAPK1, RHOA, PIK3CG, MAPK3	183	167	8465	3.32384	0.225612	0.00258145	0.001109	3.03498
KEGG_PATHWAY	hsa04020:Calcium signaling pathway	15	7.69231	0.00108376	RET, FLT1, NOS2, NOS3, TACR2, ITPR1, HTR2C, EGFR, VEGFA, EDNRA, EDNRB, ADRB3, TBXA2R, ERBB2, KDR	183	253	8465	2.7425	0.259451	0.00300201	0.00128967	2.96507
KEGG_PATHWAY	hsa04072:Phospholipase D signaling pathway	11	5.64103	0.00129504	AKT2, INSR, KIT, CXCR2, MAPK1, F2, RHOA, EGFR, MTOR, PIK3CG, MAPK3	183	148	8465	3.43801	0.301597	0.00355174	0.00152584	2.88772
KEGG_PATHWAY	hsa05213:Endometrial cancer	7	3.58974	0.00145622	GSK3B, AKT2, ERBB2, MAPK1, TP53, EGFR, MAPK3	183	58	8465	5.58272	0.332133	0.00389758	0.00167441	2.83677
KEGG_PATHWAY	hsa05171:Coronavirus disease - COVID-19	14	7.17949	0.00146213	JUN, ACE, STAT1, F2, MAPK14, TNF, EGFR, IL2, RELA, IL6, MAPK8, IL1B, MAPK1, MAPK3	183	232	8465	2.79136	0.333227	0.00389758	0.00167441	2.83501
KEGG_PATHWAY	hsa05203:Viral carcinogenesis	13	6.66667	0.00146335	JUN, RHOA, RELA, CDC42, CASP8, CDK4, CASP3, CHEK1, MDM2, CDK1, MAPK1, TP53, MAPK3	183	204	8465	2.94774	0.333454	0.00389758	0.00167441	2.83465
KEGG_PATHWAY	hsa04146:Peroxisome	8	4.10256	0.00184992	GSTK1, PRDX5, NOS2, EPHX2, CAT, SOD2, XDH, HAO2	183	82	8465	4.51286	0.401245	0.00488027	0.00209658	2.73285
KEGG_PATHWAY	hsa00590:Arachidonic acid metabolism	7	3.58974	0.00189442	CYP2C9, CYP2C8, ALOX5, EPHX2, CYP2C19, PTGS2, PTGES	183	61	8465	5.30816	0.408594	0.00495053	0.00212676	2.72252
KEGG_PATHWAY	hsa04217:Necroptosis	11	5.64103	0.00221384	HSP90AA1, MAPK8, CASP8, PARP1, STAT1, IL1B, BCL2, PYGL, JAK2, GLUL, TNF	183	159	8465	3.20016	0.458772	0.00573117	0.00246213	2.65485
KEGG_PATHWAY	hsa05321:Inflammatory bowel disease	7	3.58974	0.00262583	IL6, JUN, STAT1, IL1B, TNF, RELA, IL2	183	65	8465	4.9815	0.517277	0.00673478	0.00289328	2.58073
KEGG_PATHWAY	hsa04371:Apelin signaling pathway	10	5.12821	0.00300253	NOS2, NOS3, AKT2, ITPR1, MAPK1, PLAT, TGFBR1, MTOR, PIK3CG, MAPK3	183	139	8465	3.32783	0.565236	0.00763028	0.00327799	2.52251
KEGG_PATHWAY	hsa00830:Retinol metabolism	7	3.58974	0.00330014	CYP2C9, CYP2C8, ADH1C, ADH1B, ADH1A, CYP3A4, UGT2B7	183	68	8465	4.76173	0.599744	0.00817303	0.00351116	2.48147
KEGG_PATHWAY	hsa04664:Fc epsilon RI signaling pathway	7	3.58974	0.00330014	MAPK8, AKT2, ALOX5, MAPK1, MAPK14, TNF, MAPK3	183	68	8465	4.76173	0.599744	0.00817303	0.00351116	2.48147
KEGG_PATHWAY	hsa04140:Autophagy - animal	10	5.12821	0.00330462	ERN1, MAPK8, AKT2, PRKCD, BCL2, ITPR1, MAPK1, HIF1A, MTOR, MAPK3	183	141	8465	3.28063	0.600242	0.00817303	0.00351116	2.48088
KEGG_PATHWAY	hsa05211:Renal cell carcinoma	7	3.58974	0.00355127	CDC42, JUN, AKT2, MAPK1, HIF1A, MAPK3, VEGFA	183	69	8465	4.69272	0.62673	0.00865805	0.00371952	2.44962
KEGG_PATHWAY	hsa05222:Small cell lung cancer	8	4.10256	0.00356324	NOS2, CDK4, AKT2, CASP3, BCL2, PTGS2, TP53, RELA	183	92	8465	4.02233	0.62797	0.00865805	0.00371952	2.44815
KEGG_PATHWAY	hsa00360:Phenylalanine metabolism	4	2.05128	0.00445388	MAOB, MAOA, PAH, MIF	183	16	8465	11.5642	0.709595	0.0106594	0.00457932	2.35126
KEGG_PATHWAY	hsa04152:AMPK signaling pathway	9	4.61538	0.00446387	CPT1A, AKT2, HNF4A, INSR, PPARG, HMGCR, IGF1, CFTR, MTOR	183	121	8465	3.44059	0.710402	0.0106594	0.00457932	2.35029
KEGG_PATHWAY	hsa05231:Choline metabolism in cancer	8	4.10256	0.00505444	JUN, MAPK8, AKT2, MAPK1, HIF1A, EGFR, MTOR, MAPK3	183	98	8465	3.77607	0.754297	0.0119665	0.00514084	2.29633
KEGG_PATHWAY	hsa04640:Hematopoietic cell lineage	8	4.10256	0.00534271	IL6, ITGA4, FLT3, IL1B, ANPEP, ITGB3, KIT, TNF	183	99	8465	3.73793	0.773248	0.0124931	0.00536708	2.27224
KEGG_PATHWAY	hsa03320:PPAR signaling pathway	7	3.58974	0.00536708	FABP1, CPT1A, FABP4, NR1H3, PPARG, PPARA, PPARD	183	75	8465	4.3173	0.774782	0.0124931	0.00536708	2.27026
KEGG_PATHWAY	hsa01240:Biosynthesis of cofactors	10	5.12821	0.00565384	ALAD, DHFR, NQO1, FECH, GSS, FPGS, AKR1A1, NME2, UGT2B7, DHODH	183	153	8465	3.02332	0.792071	0.0130509	0.00565384	2.24766
KEGG_PATHWAY	hsa05134:Legionellosis	6	3.07692	0.0073771	IL6, CASP8, IL1B, CASP3, TNF, RELA	183	57	8465	4.86914	0.871398	0.0168881	0.0073771	2.13211
KEGG_PATHWAY	hsa05216:Thyroid cancer	5	2.5641	0.00784863	RET, MAPK1, PPARG, TP53, MAPK3	183	37	8465	6.25092	0.887257	0.0178202	0.00784863	2.10521
KEGG_PATHWAY	hsa04910:Insulin signaling pathway	9	4.61538	0.00928962	GSK3B, PTPN1, MAPK8, AKT2, INSR, MAPK1, PYGL, MTOR, MAPK3	183	137	8465	3.03877	0.924623	0.0209205	0.00928962	2.032
KEGG_PATHWAY	hsa01232:Nucleotide metabolism	7	3.58974	0.00978086	PNP, NME2, HPRT1, TYMS, XDH, ADA, TYMP	183	85	8465	3.80939	0.934299	0.0218492	0.00978086	2.00962
KEGG_PATHWAY	hsa04610:Complement and coagulation cascades	7	3.58974	0.0103319	SERPINA1, F9, PLAU, PLG, PLAT, F2, F3	183	86	8465	3.76509	0.943687	0.0228239	0.0103319	1.98582
KEGG_PATHWAY	hsa04213:Longevity regulating pathway - multiple species	6	3.07692	0.0104644	AKT2, INSR, CAT, IGF1, SOD2, MTOR	183	62	8465	4.47647	0.945737	0.0228239	0.0104644	1.98029
KEGG_PATHWAY	hsa00140:Steroid hormone biosynthesis	6	3.07692	0.0104644	SULT2B1, SULT1E1, COMT, CYP3A4, UGT2B7, CYP17A1	183	62	8465	4.47647	0.945737	0.0228239	0.0104644	1.98029
KEGG_PATHWAY	hsa04725:Cholinergic synapse	8	4.10256	0.0107997	ACHE, AKT2, BCL2, ITPR1, MAPK1, JAK2, PIK3CG, MAPK3	183	113	8465	3.27482	0.950599	0.0233712	0.0107997	1.96659
KEGG_PATHWAY	hsa00220:Arginine biosynthesis	4	2.05128	0.0111444	NOS2, NOS3, ARG1, GLUL	183	22	8465	8.41033	0.955146	0.0239303	0.0111444	1.95294
KEGG_PATHWAY	hsa04976:Bile secretion	7	3.58974	0.0121172	ABCB1, NR1H4, HMGCR, CYP3A4, UGT2B7, CFTR, ABCG2	183	89	8465	3.63818	0.965849	0.0258189	0.0121172	1.9166
KEGG_PATHWAY	hsa00860:Porphyrin metabolism	5	2.5641	0.013278	ALAD, FECH, BLVRB, HMOX1, UGT2B7	183	43	8465	5.3787	0.975342	0.0280764	0.013278	1.87687
KEGG_PATHWAY	hsa05020:Prion disease	13	6.66667	0.0146245	GSK3B, HSPA5, PRKCD, ITPR1, MAPK14, TNF, IL6, MAPK8, IL1B, CASP3, CCL5, MAPK1, MAPK3	183	273	8465	2.20271	0.983108	0.0306894	0.0146245	1.83492
KEGG_PATHWAY	hsa05323:Rheumatoid arthritis	7	3.58974	0.0148215	IL6, JUN, FLT1, CCL5, IL1B, TNF, VEGFA	183	93	8465	3.4817	0.984018	0.0308688	0.0148215	1.82911
KEGG_PATHWAY	hsa04921:Oxytocin signaling pathway	9	4.61538	0.0178602	JUN, NOS3, ITPR1, MAPK1, PTGS2, RHOA, EGFR, PIK3CG, MAPK3	183	154	8465	2.70332	0.993208	0.0368608	0.0178602	1.74811
KEGG_PATHWAY	hsa00620:Pyruvate metabolism	5	2.5641	0.0179647	ADH1C, ADH1B, GLO1, ADH1A, AKR1A1	183	47	8465	4.92094	0.993405	0.0368608	0.0179647	1.74558
KEGG_PATHWAY	hsa04750:Inflammatory mediator regulation of TRP channels	7	3.58974	0.0187589	MAPK8, IL1B, PRKCD, ITPR1, HTR2C, IGF1, MAPK14	183	98	8465	3.30406	0.994729	0.0382075	0.0187589	1.72679
KEGG_PATHWAY	hsa04150:mTOR signaling pathway	9	4.61538	0.0191513	GSK3B, AKT2, INSR, MAPK1, IGF1, TNF, RHOA, MTOR, MAPK3	183	156	8465	2.66866	0.995282	0.038722	0.0191513	1.7178
KEGG_PATHWAY	hsa04110:Cell cycle	9	4.61538	0.0198213	GSK3B, PRKDC, CDK4, CHEK1, MDM2, CDK1, CDC25C, TP53, CDC25B	183	157	8465	2.65167	0.996096	0.0397862	0.0198213	1.70287
KEGG_PATHWAY	hsa04623:Cytosolic DNA-sensing pathway	6	3.07692	0.0223591	IL6, CASP8, CCL5, IL1B, CASP3, RELA	183	75	8465	3.70055	0.998096	0.0442877	0.0223591	1.65054
KEGG_PATHWAY	hsa05146:Amoebiasis	7	3.58974	0.0223837	IL6, NOS2, ARG1, IL1B, CASP3, TNF, RELA	183	102	8465	3.17449	0.998109	0.0442877	0.0223837	1.65007
KEGG_PATHWAY	hsa04728:Dopaminergic synapse	8	4.10256	0.0235336	GSK3B, MAPK8, MAOB, MAOA, AKT2, ITPR1, COMT, MAPK14	183	132	8465	2.80344	0.998635	0.0459709	0.0235336	1.62831
KEGG_PATHWAY	hsa04913:Ovarian steroidogenesis	5	2.5641	0.0235663	ALOX5, INSR, IGF1, PTGS2, CYP17A1	183	51	8465	4.53498	0.998648	0.0459709	0.0235663	1.62771
KEGG_PATHWAY	hsa04064:NF-kappa B signaling pathway	7	3.58974	0.0243619	PARP1, PLAU, IL1B, BCL2, PTGS2, TNF, RELA	183	104	8465	3.11344	0.998921	0.0471906	0.0243619	1.61329
KEGG_PATHWAY	hsa00591:Linoleic acid metabolism	4	2.05128	0.0259296	CYP2C9, CYP2C8, CYP2C19, CYP3A4	183	30	8465	6.16758	0.999309	0.0498784	0.0259296	1.5862
KEGG_PATHWAY	hsa04928:Parathyroid hormone synthesis, secretion and action	7	3.58974	0.0264541	VDR, BCL2, ITPR1, MAPK1, RHOA, EGFR, MAPK3	183	106	8465	3.0547	0.999405	0.0504323	0.0264541	1.57751
KEGG_PATHWAY	hsa04630:JAK-STAT signaling pathway	9	4.61538	0.0265816	IL6, STAT1, AKT2, BCL2, JAK2, EGFR, IL2, MTOR, MCL1	183	166	8465	2.5079	0.999426	0.0504323	0.0265816	1.57542
KEGG_PATHWAY	hsa04215:Apoptosis - multiple species	4	2.05128	0.0307086	MAPK8, CASP8, CASP3, BCL2	183	32	8465	5.7821	0.999823	0.0578659	0.0307086	1.51274
KEGG_PATHWAY	hsa04662:B cell receptor signaling pathway	6	3.07692	0.0343355	GSK3B, JUN, AKT2, MAPK1, RELA, MAPK3	183	84	8465	3.30406	0.999937	0.0642631	0.0343355	1.46426
KEGG_PATHWAY	hsa04923:Regulation of lipolysis in adipocytes	5	2.5641	0.0356749	FABP4, ADRB3, AKT2, INSR, PTGS2	183	58	8465	3.98766	0.999957	0.0663219	0.0356749	1.44764
KEGG_PATHWAY	hsa04540:Gap junction	6	3.07692	0.0407256	CDK1, ITPR1, MAPK1, HTR2C, EGFR, MAPK3	183	88	8465	3.15387	0.99999	0.0752066	0.0407256	1.39013
KEGG_PATHWAY	hsa05410:Hypertrophic cardiomyopathy	6	3.07692	0.0441738	IL6, ACE, ITGA4, ITGB3, IGF1, TNF	183	90	8465	3.08379	0.999996	0.0806112	0.0441738	1.35483
KEGG_PATHWAY	hsa05143:African trypanosomiasis	4	2.05128	0.0445253	IL6, IL1B, SELE, TNF	183	37	8465	5.00074	0.999997	0.0806112	0.0445253	1.35139
KEGG_PATHWAY	hsa04960:Aldosterone-regulated sodium reabsorption	4	2.05128	0.0445253	INSR, MAPK1, IGF1, MAPK3	183	37	8465	5.00074	0.999997	0.0806112	0.0445253	1.35139
KEGG_PATHWAY	hsa04934:Cushing syndrome	8	4.10256	0.0495359	GSK3B, CDK4, ITPR1, MAPK1, AHR, EGFR, CYP17A1, MAPK3	183	155	8465	2.38745	0.999999	0.0891003	0.0495359	1.30508
KEGG_PATHWAY	hsa04024:cAMP signaling pathway	10	5.12821	0.0535159	EDNRA, JUN, MAPK8, AKT2, MAPK1, PPARA, RELA, RHOA, CFTR, MAPK3	183	225	8465	2.05586	1	0.095638	0.0535159
KEGG_PATHWAY	hsa05012:Parkinson disease	11	5.64103	0.0607749	ERN1, MAPK8, MAOB, HSPA5, MAOA, CASP3, LRRK2, ITPR1, MAPT, TP53, MAP3K5	183	266	8465	1.91288	1	0.106796	0.0607749
KEGG_PATHWAY	hsa05332:Graft-versus-host disease	4	2.05128	0.0609162	IL6, IL1B, TNF, IL2	183	42	8465	4.40541	1	0.106796	0.0609162
KEGG_PATHWAY	hsa00380:Tryptophan metabolism	4	2.05128	0.0609162	MAOB, MAOA, CAT, KYAT1	183	42	8465	4.40541	1	0.106796	0.0609162
KEGG_PATHWAY	hsa04114:Oocyte meiosis	7	3.58974	0.0629705	CDK1, ITPR1, MAPK1, IGF1, CDC25C, MAPK14, MAPK3	183	131	8465	2.47174	1	0.109703	0.0629705
KEGG_PATHWAY	hsa04061:Viral protein interaction with cytokine and cytokine receptor	6	3.07692	0.0639784	IL6, CCL5, CXCR2, TNF, IL2, CCR2	183	100	8465	2.77541	1	0.110763	0.0639784
KEGG_PATHWAY	hsa00071:Fatty acid degradation	4	2.05128	0.064489	CPT1A, ADH1C, ADH1B, ADH1A	183	43	8465	4.30296	1	0.110953	0.064489
KEGG_PATHWAY	hsa04622:RIG-I-like receptor signaling pathway	5	2.5641	0.066144	MAPK8, CASP8, MAPK14, TNF, RELA	183	71	8465	3.25752	1	0.113098	0.066144
KEGG_PATHWAY	hsa04137:Mitophagy - animal	5	2.5641	0.0689128	JUN, MAPK8, HIF1A, TP53, RELA	183	72	8465	3.21228	1	0.11711	0.0689128
KEGG_PATHWAY	hsa04530:Tight junction	8	4.10256	0.0718953	CDC42, JUN, MAPK8, CDK4, ERBB2, RHOA, CFTR, MAP3K5	183	169	8465	2.18967	1	0.120733	0.0718953
KEGG_PATHWAY	hsa02010:ABC transporters	4	2.05128	0.071917	ABCC1, ABCB1, CFTR, ABCG2	183	45	8465	4.11172	1	0.120733	0.071917
KEGG_PATHWAY	hsa04918:Thyroid hormone synthesis	5	2.5641	0.0775719	TTR, HSPA5, ALB, GSR, ITPR1	183	75	8465	3.08379	1	0.129442	0.0775719
KEGG_PATHWAY	hsa04350:TGF-beta signaling pathway	6	3.07692	0.0828876	MAPK1, TNF, RHOA, TGFBR1, TGFBR2, MAPK3	183	108	8465	2.56982	1	0.137484	0.0828876
KEGG_PATHWAY	hsa04550:Signaling pathways regulating pluripotency of stem cells	7	3.58974	0.0876571	GSK3B, AKT2, MAPK1, IGF1, JAK2, MAPK14, MAPK3	183	143	8465	2.26432	1	0.143996	0.0876571
KEGG_PATHWAY	hsa05030:Cocaine addiction	4	2.05128	0.0878533	JUN, MAOB, MAOA, RELA	183	49	8465	3.77607	1	0.143996	0.0878533
KEGG_PATHWAY	hsa05144:Malaria	4	2.05128	0.0920518	IL6, IL1B, SELE, TNF	183	50	8465	3.70055	1	0.14999	0.0920518
KEGG_PATHWAY	hsa04670:Leukocyte transendothelial migration	6	3.07692	0.0988093	CDC42, ITGA4, MMP2, MAPK14, MMP9, RHOA	183	114	8465	2.43457	1	0.160059	0.0988093
