# Supplementary figures and images for: Potential Hepatoprotective Effects of Chamaecyparis lawsoniana against Methotrexate-Induced Liver Injury: Integrated Phytochemical Profiling, Target Network Analysis, and Experimental Validation
Source: MDPI journal article supplement (doi:10.3390/antiox12122118), 2023-12-14

**Figure S2.** CLAE compounds-DILI targets network.

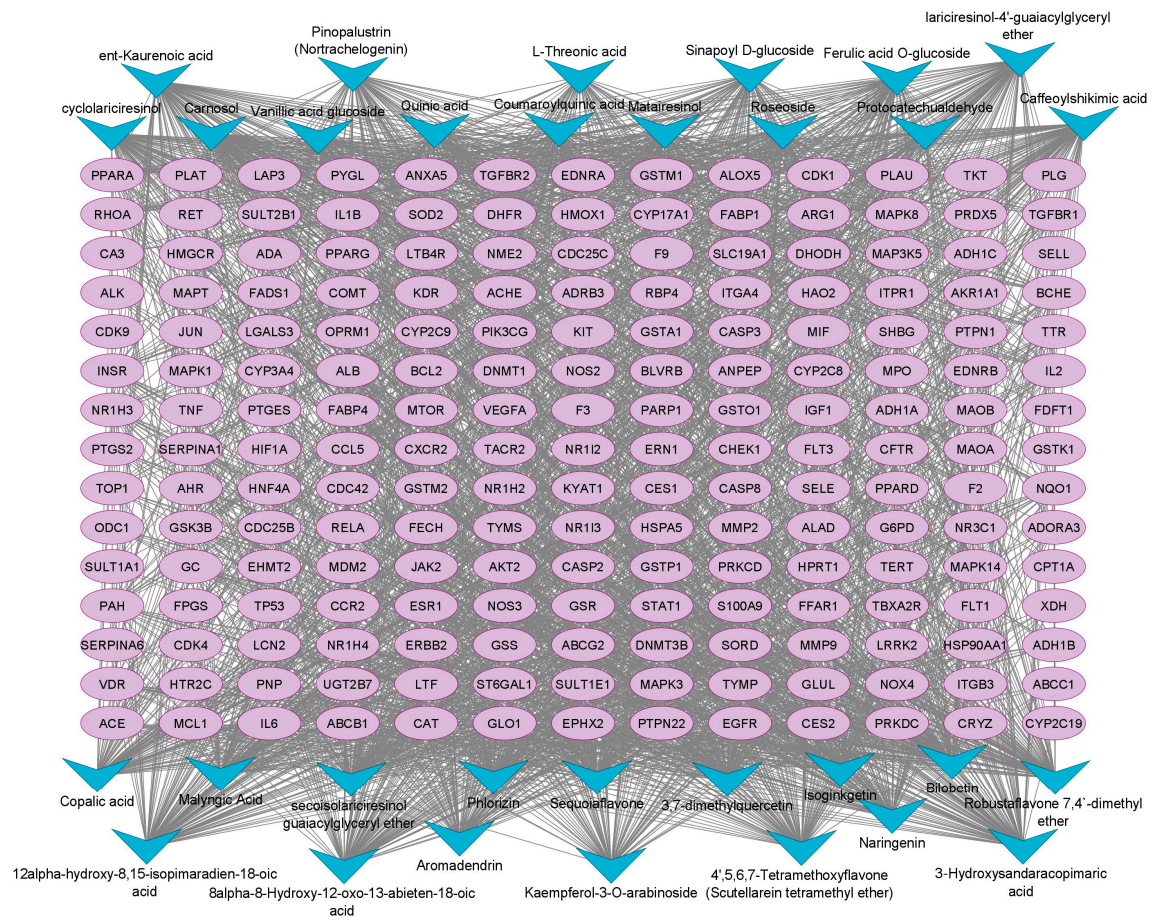

Supplement: s1 [file s1]

**Figure S1.** UPLC-ESI-MS/MS total ion chromatograms of CLAE in negative ion mode.

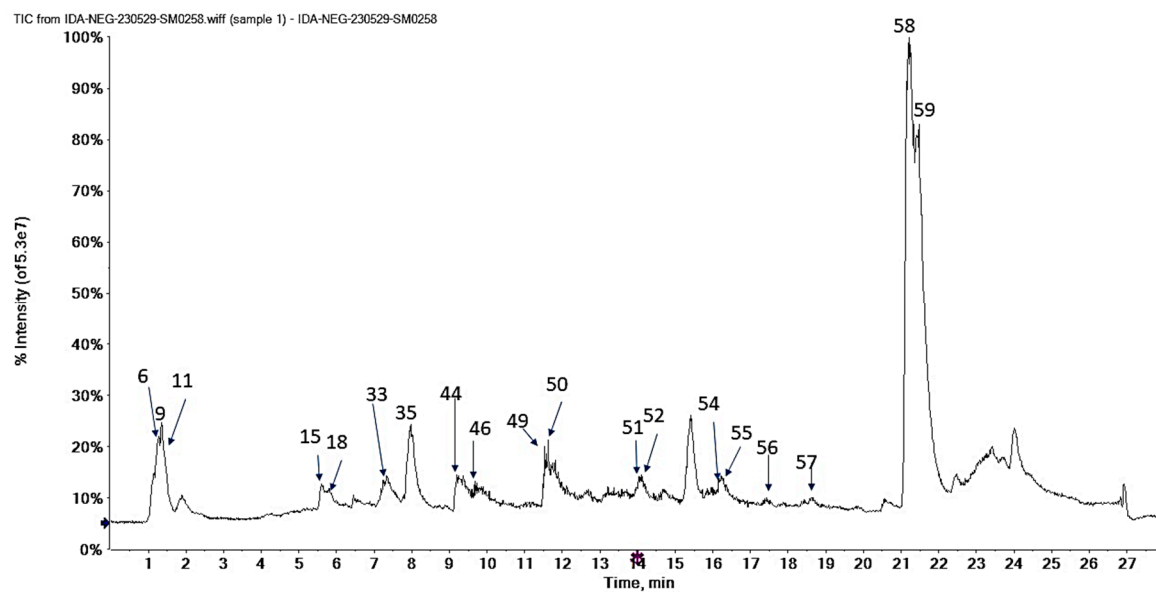

Supplement: s1 [file s1]
